# Supplementary material for: Biocatalytic approaches for a more sustainable synthesis of sandalwood fragrances
Source: Royal Society of Chemistry journal article supplement (doi:10.1039/d4gc00746h), 2024-01-01
Supplement: d4gc00746h1.pdf [file d4gc00746h1.pdf]

## **Biocatalytic approaches for a more sustainable synthesis of sandalwood fragrances**

Maria C. Cancellieri,<sup>a</sup> Davide Maggioni,<sup>a</sup> Lorenzo Di Maio,<sup>a</sup> Daniele Fiorito,<sup>a</sup>  
Elisabetta Brenna,<sup>a,b</sup> Fabio Parmeggiani<sup>a</sup> and Francesco G. Gatti<sup>a,\*</sup>

- a) Department of Chemistry, Materials and Chemical Engineering “Giulio Natta”,  
Politecnico di Milano, P. zza L. da Vinci 32, Milano, 20133, Italy
- b) Istituto di Scienze e Tecnologie Chimiche “Giulio Natta” - Consiglio Nazionale  
delle Ricerche (SCITEC-CNR), via Mancinelli 7, Milano, 20131, Italy

\* Corresponding author

Telephone: +39 02 23993070-72, Fax: +39 02 23993080

E-mail: francesco.gatti@polimi.it

## Table of Contents

|                                                                                                                                                                                |    |
|--------------------------------------------------------------------------------------------------------------------------------------------------------------------------------|----|
| General Information .....                                                                                                                                                      | 5  |
| Enzymes and strains .....                                                                                                                                                      | 5  |
| Synthesis of campholenic aldehyde from $\alpha$ -pinene (2 and 3) .....                                                                                                        | 6  |
| Scheme S1 Reaction conditions .....                                                                                                                                            | 6  |
| Screening of epoxidations methods for synthesis of $\alpha$ -pinene oxide (3) .....                                                                                            | 6  |
| Table S1 Screening of different epoxidation methods .....                                                                                                                      | 6  |
| Procedures (A-G) .....                                                                                                                                                         | 6  |
| A) NHPI catalyzed epoxidation with O <sub>2</sub> /CH <sub>3</sub> CHO .....                                                                                                   | 6  |
| B) Epoxidation with MCPBA .....                                                                                                                                                | 6  |
| C) Payne epoxidation with CCl <sub>3</sub> CN .....                                                                                                                            | 7  |
| D) Payne epoxidation with MeCN in MeOH .....                                                                                                                                   | 7  |
| E) Payne epoxidation with MeCN .....                                                                                                                                           | 7  |
| F) Payne epoxidation with PhCN .....                                                                                                                                           | 7  |
| G) Payne epoxidation with CCl <sub>3</sub> CN with <i>in situ</i> H <sub>2</sub> O <sub>2</sub> generation .....                                                               | 7  |
| Recovery of CCl <sub>3</sub> CN from CCl <sub>3</sub> CONH <sub>2</sub> .....                                                                                                  | 7  |
| Campholenic aldehyde (2) .....                                                                                                                                                 | 8  |
| Synthesis of $\alpha,\beta$ -unsaturated carbonyl compounds for bioreductions (4a-c and 6) .....                                                                               | 9  |
| Scheme S2 Reaction conditions .....                                                                                                                                            | 9  |
| ( <i>R,E</i> )-2-methyl-4-(2,2,3-trimethylcyclopent-3-en-1-yl)but-2-enal (4a) .....                                                                                            | 9  |
| ( <i>R,E</i> )-3-methyl-5-(2,2,3-trimethylcyclopent-3-en-1-yl)pent-3-en-2-one (4c, Sandex®) .....                                                                              | 9  |
| General procedure for the synthesis of ( <i>S</i> ) or ( <i>R</i> ) enantiomer of ( <i>E</i> )-5-(2,2,3-trimethylcyclopent-3-en-1-yl)pent-3-en-2-one (6) .....                 | 10 |
| ( <i>S</i> )-2-(2,2,3-trimethylcyclopent-3-en-1-yl)acrylaldehyde (10) .....                                                                                                    | 10 |
| Methyl ( <i>R,E</i> )-2-methyl-4-(2,2,3-trimethylcyclopent-3-en-1-yl)penta-2,4-dienoate (11) .....                                                                             | 11 |
| ( <i>R,E</i> )-2-methyl-4-(2,2,3-trimethylcyclopent-3-en-1-yl)penta-2,4-dien-1-ol (12) .....                                                                                   | 11 |
| ( <i>R,E</i> )-2-methyl-4-(2,2,3-trimethylcyclopent-3-en-1-yl)penta-2,4-dienal (4b) .....                                                                                      | 11 |
| Synthesis of $\alpha$ -methylene carbonyl substrates for bioreductions (5a-d) .....                                                                                            | 12 |
| Scheme S3 Reaction conditions .....                                                                                                                                            | 12 |
| Methyl ( <i>S,E</i> )-4-(2,2,3-trimethylcyclopent-3-en-1-yl)but-2-enoate (13) .....                                                                                            | 13 |
| Methyl ( <i>S</i> )-4-(2,2,3-trimethylcyclopent-3-en-1-yl)butanoate (14) .....                                                                                                 | 13 |
| ( <i>S</i> )-4-(2,2,3-trimethylcyclopent-3-en-1-yl)butan-1-ol (15) .....                                                                                                       | 13 |
| ( <i>S</i> )-4-(2,2,3-trimethylcyclopent-3-en-1-yl)butanal (16) .....                                                                                                          | 14 |
| ( <i>S</i> )-2-methylene-4-(2,2,3-trimethylcyclopent-3-en-1-yl)butanal (5a) .....                                                                                              | 14 |
| ( <i>S</i> )-2-(2,2,3-trimethylcyclopent-3-en-1-yl)prop-2-en-1-ol (17) .....                                                                                                   | 14 |
| ( <i>S</i> )-1,5,5-trimethyl-4-(3-(vinylloxy)prop-1-en-2-yl)cyclopent-1-ene (18) .....                                                                                         | 14 |
| ( <i>R</i> )-4-(2,2,3-trimethylcyclopent-3-en-1-yl)pent-4-enal (19) .....                                                                                                      | 15 |
| ( <i>R</i> )-2-methylene-4-(2,2,3-trimethylcyclopent-3-en-1-yl)pent-4-enal (5b) .....                                                                                          | 15 |
| ( <i>R</i> )-2-(2,2,3-trimethylcyclopent-3-en-1-yl)ethan-1-ol (20) .....                                                                                                       | 15 |
| ( <i>R</i> )-4-(2-bromoethyl)-1,5,5-trimethylcyclopent-1-ene (21) .....                                                                                                        | 16 |
| ( <i>S</i> )-3-(2-(2,2,3-trimethylcyclopent-3-en-1-yl)ethyl)pentane-2,4-dione (22) and ( <i>R</i> )-4-(2-(2,2,3-trimethylcyclopent-3-en-1-yl)ethoxy)pent-3-en-2-one (23) ..... | 16 |
| ( <i>S</i> )-5-(2,2,3-trimethylcyclopent-3-en-1-yl)pentan-2-one (8) .....                                                                                                      | 17 |
| Table S2 Reduction of ( <i>S</i> )-6 with different methodologies .....                                                                                                        | 17 |
| Procedures (A-G) .....                                                                                                                                                         | 17 |
| A) OYE2 catalysed reduction .....                                                                                                                                              | 17 |

|                                                                                                                                                                   |           |
|-------------------------------------------------------------------------------------------------------------------------------------------------------------------|-----------|
| B) Reduction catalysed by Pd/C in presence of NH <sub>4</sub> HCO <sub>2</sub> .....                                                                              | 17        |
| C) Reduction catalysed by Pd/C in presence of NH <sub>4</sub> HCO <sub>2</sub> .....                                                                              | 18        |
| D) Reduction with Mg/MeOH .....                                                                                                                                   | 18        |
| E) Hydrogenation catalyzed by Lindlar catalyst .....                                                                                                              | 18        |
| F) Hydrogenation catalyzed by Wilkinson catalyst .....                                                                                                            | 18        |
| G) Reduction with NiCl <sub>2</sub> /NaBH <sub>4</sub> .....                                                                                                      | 18        |
| (S)-3-methylene-5-(2,2,3-trimethylcyclopent-3-en-1-yl)pentan-2-one ( <b>5c</b> ) .....                                                                            | 18        |
| Route A: Deacylation/methylenation of <b>22</b> .....                                                                                                             | 18        |
| Route B: Mannich of <b>8</b> .....                                                                                                                                | 18        |
| (S,E,Z)-5-(2,2,3-trimethylcyclopent-3-en-1-yl)pent-4-en-2-one ( <b>24</b> ) .....                                                                                 | 18        |
| (S,Z)-3-methylene-5-(2,2,3-trimethylcyclopent-3-en-1-yl)pent-4-en-2-one ( <b>5d</b> ) .....                                                                       | 19        |
| <b>Evaluation of ER stereoselectivity from the diastereomeric excess by mass balance</b> .....                                                                    | <b>20</b> |
| <b>Figure S1</b> Example of GC chromatogram of a mixture of two diastereoisomers. ....                                                                            | 20        |
| <b>General procedure for the screening of the ER catalyzed reduction of 4c and 5c</b> .....                                                                       | <b>21</b> |
| <b>Table S3</b> Reduction of <b>4c</b> .....                                                                                                                      | 21        |
| <b>Table S4</b> Reduction of <b>5c</b> .....                                                                                                                      | 21        |
| <b>Bioreductions at preparative scale</b> .....                                                                                                                   | <b>22</b> |
| <b>Table S5</b> OYE2 stereoselectivity .....                                                                                                                      | 22        |
| (S)-2-methyl-4-((S)-2,2,3-trimethylcyclopent-3-en-1-yl)butan-1-ol ( <b>2S,S'-1a</b> ) .....                                                                       | 22        |
| (R)-2-methyl-4-((S)-2,2,3-trimethylcyclopent-3-en-1-yl)butan-1-ol ( <b>2R,S'-1a</b> ) .....                                                                       | 22        |
| (S)-2-methyl-4-((R)-2,2,3-trimethylcyclopent-3-en-1-yl)pent-4-en-1-ol ( <b>2S,R'-1b</b> ) .....                                                                   | 23        |
| (R)-2-methyl-4-((R)-2,2,3-trimethylcyclopent-3-en-1-yl)pent-4-en-1-ol ( <b>2R,R'-1b</b> ) .....                                                                   | 23        |
| (2R,3S)-3-methyl-5-((S)-2,2,3-trimethylcyclopent-3-en-1-yl)pentan-2-ol ( <b>2R,3S,S'-1c</b> ) .....                                                               | 23        |
| (2S,3S)-3-methyl-5-((S)-2,2,3-trimethylcyclopent-3-en-1-yl)pentan-2-ol ( <b>2S,3S,S'-1c</b> ) .....                                                               | 23        |
| (2S,3R)-3-methyl-5-((S)-2,2,3-trimethylcyclopent-3-en-1-yl)pentan-2-ol ( <b>2S,3R,S'-1c</b> ) .....                                                               | 24        |
| (2R,3R)-3-methyl-5-((S)-2,2,3-trimethylcyclopent-3-en-1-yl)pentan-2-ol ( <b>2R,3R,S'-1c</b> ) .....                                                               | 24        |
| (2S,3R,Z)-3-methyl-5-((S)-2,2,3-trimethylcyclopent-3-en-1-yl)pent-4-en-2-ol ( <b>Z,2S,3R,S'-1d</b> ) .....                                                        | 24        |
| <b>General procedure for bioreduction with OYE2 at preparative scale</b> .....                                                                                    | <b>25</b> |
| (R)-3-methyl-5-((S)-2,2,3-trimethylcyclopent-3-en-1-yl)pentan-2-one ( <b>3R,S'-7c</b> ) .....                                                                     | 25        |
| (R,Z)-3-methyl-5-((S)-2,2,3-trimethylcyclopent-3-en-1-yl)pent-4-en-2-one ( <b>Z,3R,S'-7d</b> ) .....                                                              | 25        |
| <b>Characterization of commercial sandalwood fragrances</b> .....                                                                                                 | <b>26</b> |
| <b>1a</b> , Brahmanol® .....                                                                                                                                      | 26        |
| <b>1b</b> , Firsantol® .....                                                                                                                                      | 26        |
| <b>1c</b> , Sandalore® .....                                                                                                                                      | 26        |
| <b>1d</b> , Ebanol® .....                                                                                                                                         | 27        |
| <b>Stacked <sup>13</sup>C-NMR spectra of sandalwood fragrances</b> .....                                                                                          | <b>28</b> |
| <b>Figure S2</b> <sup>13</sup> C NMR spectra, C1 signal expanded regions: <b>A</b> ) Brahamnol® isomers; <b>B</b> ) Firsantol® isomers. ....                      | 28        |
| <b>Figure S3</b> <sup>13</sup> C NMR spectra expanded regions: <b>A</b> ) C(3)-Me signal for Ebanol® isomers; <b>B</b> ) C(3) signal for Sandalore® isomers. .... | 28        |
| <b>General procure for the preparation of the Mosher's esters of 1c</b> .....                                                                                     | <b>29</b> |
| (R)-MTPA-Evo440 .....                                                                                                                                             | 29        |
| (R)-MTPA-Evo270 .....                                                                                                                                             | 29        |
| (S)-MTPA-Evo440 .....                                                                                                                                             | 29        |

---

|                                                                                                                                                                              |           |
|------------------------------------------------------------------------------------------------------------------------------------------------------------------------------|-----------|
| (S)-MTPA-Evo270 .....                                                                                                                                                        | 30        |
| <b>Assignment of absolute stereochemical configuration of C(2) stereogenic center of Sandalore® alcohols through analysis of NMR chemical shift of Mosher's esters .....</b> | <b>31</b> |
| <b>Figure S4</b> Mosher's esters conformation and NMR spectra .....                                                                                                          | 31        |
| <b>Assignment of absolute stereochemical configuration of C(2) stereogenic center of ketone 7d through 2D NOESY experiment and DFT computation .....</b>                     | <b>32</b> |
| NOESY experiment .....                                                                                                                                                       | 32        |
| DFT calculations .....                                                                                                                                                       | 32        |
| <b>Table S6</b> Energies and geometric parameters of conformers. ....                                                                                                        | 32        |
| Coordinates .....                                                                                                                                                            | 33        |
| <b>Table S7</b> Olfactory evaluation .....                                                                                                                                   | 35        |
| <b>Copies of <math>\alpha</math>-pinene chiral GC chromatograms .....</b>                                                                                                    | <b>36</b> |
| <b>Table S8</b> Simplified Environmental factor (sEF) analysis.....                                                                                                          | <b>37</b> |
| <b>Table S9</b> Complete Environmental factor (cEF) analysis.....                                                                                                            | <b>37</b> |
| <b>Table S10</b> Semi-quantitative ECOScale analysis .....                                                                                                                   | <b>38</b> |
| <b>Copies of <math>^1\text{H}</math>, <math>^{13}\text{C}</math> and <math>^{19}\text{F}</math> NMR spectra .....</b>                                                        | <b>39</b> |
| <b>References and notes.....</b>                                                                                                                                             | <b>92</b> |

## General information

Chemicals and solvents were purchased from suppliers and used without further purification, while, where required, the solvents were dried over molecular sieves (4 Å).  $^1\text{H}$ ,  $^{13}\text{C}$  and  $^{19}\text{F}$  NMR spectra were recorded on a 400 MHz spectrometer at 302 K in  $\text{CDCl}_3$ ; chemical shifts ( $\delta$ ) are expressed in ppm relative to the TMS reference signal or to the signal of residual  $\text{CHCl}_3$  (signal = 7.26 ppm for  $^1\text{H}$  and signal = 77.16 ppm for  $^{13}\text{C}$ ) or to the signal of internal standard reference ppm for  $^{19}\text{F}$  ( $\text{C}_6\text{H}_5\text{F}$ , signal = -112.96). The concentration of  $\text{H}_2\text{O}_2$  was measured in a coaxial tube (5 mm),  $\text{D}_2\text{O}$  was used as external lock, and the chemical shift calibration was done on the HDO residual (signal = 4.71 ppm). The GC-MS analyses of all compounds were performed on a column with a low polarity stationary phase (30 m x 0.25 mm x 0.25  $\mu\text{m}$ ). Program temperature: 60 °C (1 min)/6 °C  $\text{min}^{-1}$ /150 °C (1 min)/12 °C  $\text{min}^{-1}$ /280 °C (5 min). For compounds **7c-d** was used a slightly modified program temperature: 60 °C (0 min)/2.5 °C  $\text{min}^{-1}$ /120 °C (9 min)/90 °C  $\text{min}^{-1}$ /280 °C (3 min). TLC analyses were performed on precoated silica gel 60  $\text{F}_{254}$  plates, and spots were visualized either by UV light (254 nm) or by spraying with phosphomolybdic acid reagent. All chromatographic separations were carried out on silica gel columns (230-400 mesh). The distillations were performed on a bulb-to-bulb Kugelrohr like apparatus. Photoisomerization was carried out on a Rayonet photoreactor equipped with UV lamps (80 W). Before use, XAD-1180 resins were pre-conditioned in water until reaching a neutral pH, then washed with acetone. Optical rotations  $[\alpha_D]$  were determined on a digital automatic polarimeter at 589 nm (sodium D line) and are given at 20 °C in  $^\circ \text{cm}^3 \text{g}^{-1} \text{dm}^{-1}$ . Chiral GC analyses were performed on a CP7502 Chirasil-DEX CB column (25 m x 0.25 mm x 0.25  $\mu\text{m}$ ). Program temperature: 80 °C (1 min)/5 °C  $\text{min}^{-1}$ /150 °C (1 min)/60 °C  $\text{min}^{-1}$ /200 °C (2 min).

## Enzymes and strains

OYE1 (UniProtKB accession number Q02899) from *Saccharomyces pastorianus*, OYE2 (UniProtKB accession number Q03558) from *Saccharomyces cerevisiae*, OYE3 (UniProtKB accession number P41816) from *Saccharomyces cerevisiae*, NemaA (UniProtKB accession number P77258) from *E. coli*, YqjM (UniProtKB accession number P54550) from *Bacillus subtilis*. GDH from *Bacillus megaterium*<sup>1</sup> (UniProtKB accession D5DB49) harboring a specific plasmid, according to standard molecular biology techniques.<sup>2</sup> Protein concentrations were determined according to the Bradford test, using Bovine Serum Albumin (BSA) as a standard. Evo270, Evo440 from an unspecified source were purchased from evovx GmbH in the form of freeze-dried powder and used without further purifications. For Evo270 the activity was 15u/mg, test carried out on acetophenone as standard substrate. For Evo440 the activity was 1 u/mg, test carried out on cyclohexanone as standard substrate. Glucose Oxidase (GOX) from *Aspergillus niger* was purchased from Sigma-Aldrich in the form of lyophilized powder (Type II, 19'290 units/g solid) and used without further purifications.

## Synthesis of campholenic aldehyde from $\alpha$ -pinene (2 and 3)

Campholenic aldehyde **2** was prepared from commercially available  $\alpha$ -pinene by a two-step sequence: *i*) Payne epoxidation, followed by *ii*) the  $\text{ZnBr}_2$  catalysed Meinwald rearrangement (Scheme S1). Payne epoxidation proved to be the most performing procedure among a series of tested methodologies (Table S1). Both overall yield (85%) and chemoselectivity were more than satisfactory. After work-up, the pinene epoxide had a sufficiently high purity (89%) to be directly used in the subsequent steps, rendering additional purification procedures unnecessary.

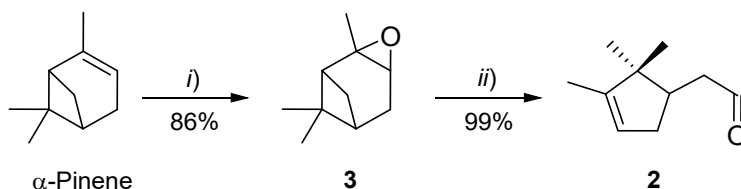

**Scheme S1** Reaction conditions: *i*)  $\text{H}_2\text{O}_2$ ,  $\text{CCl}_3\text{CN}$ ,  $\text{K}_2\text{HPO}_4$  buffer,  $\text{CH}_2\text{Cl}_2$ ; *ii*) cat.  $\text{ZnBr}_2$ , toluene.

## Screening of epoxidations methods for synthesis of $\alpha$ -pinene oxide (3)

Different oxidation protocols were tested, in the following we report the procedures according to Table S1.

**Table S1** Screening of different epoxidation methods

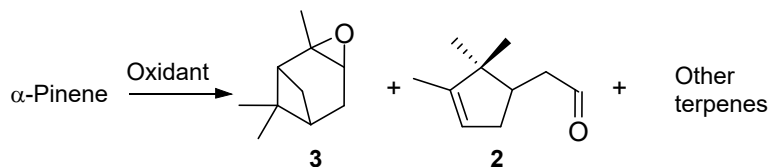

| Reaction conditions                                                                                                                                               | Conv. [%] <sup>a</sup> | Prod. Distribution [%] <sup>a</sup> |          |             |
|-------------------------------------------------------------------------------------------------------------------------------------------------------------------|------------------------|-------------------------------------|----------|-------------|
|                                                                                                                                                                   |                        | <b>3</b>                            | <b>2</b> | Other terps |
| <b>A)</b> $\text{O}_2$ , <sup>b</sup> 3 eq $\text{CH}_3\text{CHO}$ , 0.1 eq NHPI, MeCN, 60 °C                                                                     | 62                     | 55                                  | 17       | 28          |
| <b>B)</b> 1.3 eq MCPBA, 1.0 eq $\text{NaHCO}_3$ , $\text{CH}_2\text{Cl}_2$ , 5-10 °C                                                                              | 91 (91) <sup>c</sup>   | 82                                  | 8        | 10          |
| <b>C)</b> 1.2 eq $\text{H}_2\text{O}_2$ , <sup>d</sup> 1.2 eq $\text{CCl}_3\text{CN}$ , KPi (pH=7), $\text{CH}_2\text{Cl}_2$ , rt                                 | >99 (99) <sup>c</sup>  | 86                                  | 5        | 9           |
| <b>D)</b> 1.1 eq $\text{H}_2\text{O}_2$ , <sup>d</sup> 1.8 eq MeCN, MeOH, $\text{KHCO}_3$ buffer (pH=9), rt                                                       | -                      | -                                   | -        | -           |
| <b>E)</b> 1.1 eq $\text{H}_2\text{O}_2$ , <sup>d</sup> 13.3 eq MeCN, KPi (pH=7), 60 °C                                                                            | 18                     | 64                                  | 7        | 29          |
| <b>F)</b> 1.5 eq $\text{H}_2\text{O}_2$ , <sup>d</sup> 6.6 eq PhCN, KPi (pH=7), 60 °C                                                                             | -                      | -                                   | -        | -           |
| <b>G)</b> <i>i</i> ) $\text{O}_2$ , <sup>b</sup> GOX, 3 eq glucose, KPi (pH=7), 30 °C; <i>ii</i> ) 1.5 eq $\text{CCl}_3\text{CN}$ , $\text{CH}_2\text{Cl}_2$ , rt | 65                     | 68                                  | 17       | 15          |

a) Not isolated yield, by GC-MS; b) Bubbling; c) Yield of not isolated product; d) Concentration 30% w/v.

## Procedures

### A) NHPI catalyzed epoxidation with $\text{O}_2/\text{CH}_3\text{CHO}$

This procedure was slightly modified with respect to that reported in the literature.<sup>3</sup> To a solution of NHPI (163 mg) in MeCN (7 mL) heated at 60 °C was added acetaldehyde (1.32 g) and  $\alpha$ -pinene (1.36 g). Then, pure  $\text{O}_2$  was gently bubbled into the reaction solution for 2 hours. Product not isolated.

### B) Epoxidation with MCPBA

This procedure was slightly modified with respect to that reported in the literature.<sup>4</sup> To an ice-cooled and mechanically stirred suspension of MCPBA (77% w/w, 22.0 g) and  $\text{NaHCO}_3$  (11.0 g) in  $\text{CH}_2\text{Cl}_2$  (250 mL) was added dropwise a solution of  $\alpha$ -pinene (13.6 g) in  $\text{CH}_2\text{Cl}_2$  (20 mL) at a rate such that the temperature was kept between 5-10 °C (usually over 30 minutes). After 2 hours the reaction mixture was quenched with an aq. solution of  $\text{NaHSO}_3$  (1.0 M, 50 mL) and left to stir (30 minutes) at room temperature, then it was filtered. The white solid was washed with  $\text{CH}_2\text{Cl}_2$  (2 x 25 mL). The organic phase was first washed with  $\text{H}_2\text{O}$  (50 mL) and then with an aq. solution of  $\text{NaHCO}_3$  (sat., 100 mL). The combined aqueous phase was washed with  $\text{CH}_2\text{Cl}_2$  (2 x 25 mL). Then, the combined organic phase was dried over anhydrous  $\text{Na}_2\text{SO}_4$

and concentrated under *vacuum* affording **3** as a pale-yellow liquid. Yield 91% (14.0 g); *tr*= 9.2 min, 82% purity by GC-MS.

### C) Payne epoxidation with CCl<sub>3</sub>CN

The following oxidation was adapted from Payne's seminal paper.<sup>5</sup> To a solution of  $\alpha$ -pinene (20.4 g) in CH<sub>2</sub>Cl<sub>2</sub> (350 mL) were added CCl<sub>3</sub>CN (26.0 g) and an aq. solution of K<sub>2</sub>HPO<sub>4</sub>·3H<sub>2</sub>O (1.3 M, 40 mL). Then, to the ice-cooled biphasic mixture was added dropwise (rate = 1 mL/min) a solution of H<sub>2</sub>O<sub>2</sub> (30% w/v, 20.4 mL). After 1 hour the reaction mixture was left to stir for 12 hours at room temperature. Then, the organic phase was separated and washed with brine (sat., 50 mL). The combined aqueous phase was washed with CH<sub>2</sub>Cl<sub>2</sub> (2 x 30 mL). The combined organic phase was dried over anhydrous Na<sub>2</sub>SO<sub>4</sub> and concentrated under *vacuum*. The mixture was diluted in *n*-hexane (150 mL), filtered and the cake was washed with *n*-hexane (3 x 20 mL). The by-product CCl<sub>3</sub>CONH<sub>2</sub> was isolated as white solid (24.1 g). Then, the organic solution was concentrated under *vacuum* affording **3** of sufficient purity to be used in the next step.

Yield 99% (22.5 g) as a pale-yellow oil; *tr*= 9.2 min, 86% purity by GC-MS. <sup>1</sup>H-NMR (CDCl<sub>3</sub>, 400 MHz):  $\delta$  3.05 (dd, *J* = 4.2 and 1.5 Hz, 1H), 2.04-1.84 (m, 4H), 1.71 (m, 1H), 1.61 (d, *J* = 9.4 Hz, 1H), 1.33 (s, 3H), 1.28 (s, 3H), 0.93 (s, 3H); <sup>13</sup>C{<sup>1</sup>H}-NMR (CDCl<sub>3</sub>, 101 MHz):  $\delta$  60.4, 57.0, 45.3, 40.7, 39.9, 27.8, 26.9, 26.0, 22.5, 20.3; GC-MS: *m/z* (%): 152 (M<sup>+</sup>, 2), 137 (45), 109 (65), 67 (100). For oxidation of (-)- $\alpha$ -pinene (*ee* 82%, by chiral GC) [ $\alpha$ ]<sub>D</sub> = -78.7 (CHCl<sub>3</sub>, *c* = 1.3) vs litt. -103.9 (CHCl<sub>3</sub>, *c* = 4.1),<sup>6</sup> for (+) enantiomer (*ee* 92%, by chiral GC) [ $\alpha$ ]<sub>D</sub> = +80.7 (CHCl<sub>3</sub>, *c* = 1.1) vs litt. +55 (CHCl<sub>3</sub>, *c* = 0.2).<sup>7</sup>

### D) Payne epoxidation with MeCN in MeOH

The procedure C was applied with the following exceptions: MeCN (14 mL) instead of CCl<sub>3</sub>CN, KHCO<sub>3</sub> (2.6 g) instead of K<sub>2</sub>HPO<sub>4</sub> solution, MeOH (80 mL) instead of CH<sub>2</sub>Cl<sub>2</sub>. Product not isolated.

### E) Payne epoxidation with MeCN

The procedure C was applied with the following exceptions: MeCN (104 mL) instead of CCl<sub>3</sub>CN and MeOH, T=60 °C. product not isolated.

### F) Payne epoxidation with PhCN

The procedure C was applied with the following exceptions: PhCN (103 mL) instead of CCl<sub>3</sub>CN and MeOH, T=60 °C. Product not isolated.

### G) Payne epoxidation with CCl<sub>3</sub>CN with *in situ* H<sub>2</sub>O<sub>2</sub> generation

To an aqueous solution of anhydrous  $\alpha$ -D-glucose (270 mg) and GOX (60 mg) in a phosphate buffer (pH=7, 50 mM, 3 mL) at 30 °C was gently bubbled pure O<sub>2</sub> for 12 hours. The formation of H<sub>2</sub>O<sub>2</sub> was monitored by <sup>13</sup>C{<sup>1</sup>H}-NMR of the crude material in a coaxial tube with capillary filled with D<sub>2</sub>O, the H<sub>2</sub>O<sub>2</sub> concentration was evaluated 1.2% w/v (see NMR spectra). Then, the solution was used in the Payne oxidation of  $\alpha$ -pinene with CCl<sub>3</sub>CN (C procedure). Product not isolated.

### Recovery of CCl<sub>3</sub>CN from CCl<sub>3</sub>CONH<sub>2</sub>

The amide CCl<sub>3</sub>CONH<sub>2</sub> (24.1 g) was mechanically mixed with P<sub>4</sub>O<sub>10</sub> (42.0 g). Then, xylene (20 mL) was added, and the mixture was refluxed.<sup>8</sup> After 12 hours, the resulting mixture was distilled (Claisen type head distillation equipped with a 10 cm Vigreux column) affording crude CCl<sub>3</sub>CN (b.p. 85-86 °C, 17.5 g). To obtain a higher purity, a rectification was required. Yield 65% (13.9 g); 96% purity by <sup>13</sup>C{<sup>1</sup>H}-NMR (CDCl<sub>3</sub>, 101 MHz):  $\delta$ =113.1, 70.2.<sup>9</sup>

**Campholenic aldehyde (2)**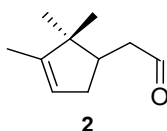

To a solution of **3** (22.5 g) in dry toluene (150 mL) was added anhydrous  $\text{ZnBr}_2$  (1.7 g). The mixture was stirred at room temperature under an inert atmosphere ( $\text{N}_2$ ). After 12 hours, the reaction mixture was quenched with an aq. solution of  $\text{CH}_3\text{CO}_2\text{H}$  (10% v/v, 30 mL) and left to stir at room temperature (10 min). The organic phase was washed with  $\text{H}_2\text{O}$  (50 mL) and then with a aq. solution of  $\text{NaHCO}_3$  (sat., 50 mL). The organic phase was dried over anhydrous  $\text{Na}_2\text{SO}_4$  and concentrated under *vacuum* affording **2**.<sup>10</sup>

Yield 99% (22.3 g) as a pale-yellow oil;  $t_r$  = 9.9 min, 89% purity by GC-MS;  $^1\text{H-NMR}$  ( $\text{CDCl}_3$ , 400 MHz):  $\delta$  9.79 (t,  $J$ =2.3 Hz, 1H), 5.23 (m, 1H), 2.52 (ddd,  $J$ =15.5, 4.3 and 2.0 Hz, 1H), 2.43-2.33 (m, 2H), 2.27 (m, 1H), 1.88 (ddt,  $J$ =15.5, 8.7 and 2.4 Hz, 1H), 1.61 (dt, 2.8 and 1.6 Hz, 3H), 0.99 (s, 3H), 0.78 (s, 3H);  $^{13}\text{C}\{^1\text{H}\}\text{-NMR}$  ( $\text{CDCl}_3$ , 101 MHz):  $\delta$  203.0, 148.1, 121.7, 47.1, 45.2, 44.4, 35.7, 25.8, 20.1, 12.7; GC-MS:  $m/z$  (%): 152 ( $\text{M}^+$ , 1), 108 (100), 95 (40), 93 (80). For rearrangement of (-)- $\alpha$ -pinene oxide (*ee* 82%) was obtained the (*R*)-campholenic aldehyde:  $[\alpha]_D = +3.8$  ( $\text{CHCl}_3$ ,  $c = 1.1$ ) vs litt. +3.0 ( $\text{CHCl}_3$ ,  $c = 1.06$ );<sup>11</sup> for rearrangement of (+)- $\alpha$ -pinene oxide (*ee* 92%) was obtained the (*S*)-campholenic aldehyde:  $[\alpha]_D = -4.1$  ( $\text{CHCl}_3$ ,  $c = 1.1$ ) vs litt. -3.7 (neat).<sup>12</sup>



### Synthesis of $\alpha,\beta$ -unsaturated carbonyl compounds for bioreductions (**4a-c** and **6**)

Substrates **4a-c** and **6** were prepared following procedures reported in patent literature (Scheme S2). Yields and diastereoselectivity were consistent with those reported in the patents.

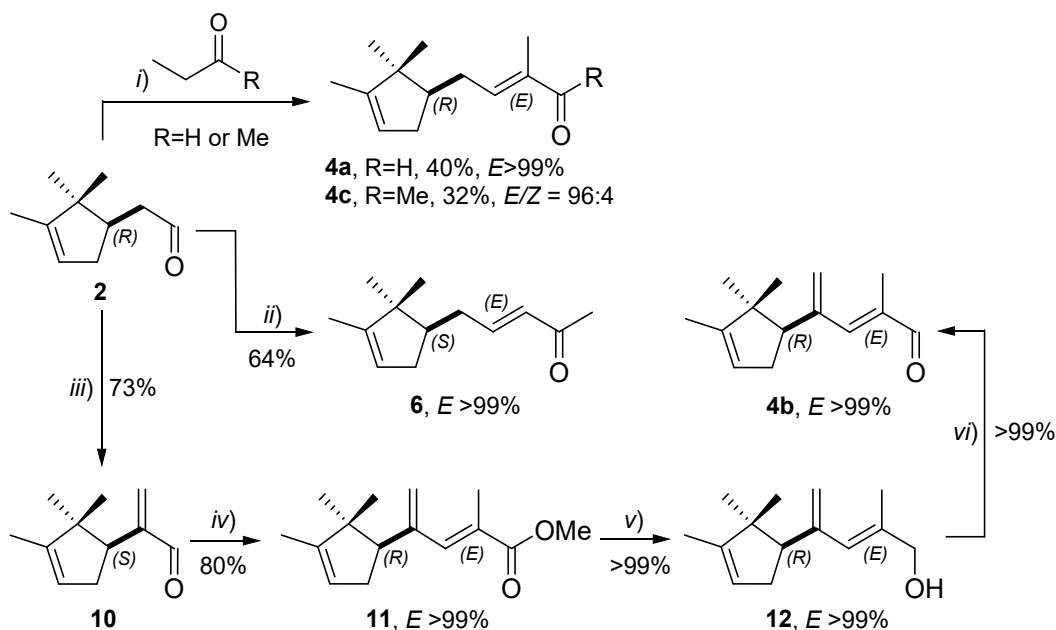

**Scheme S2** Reaction conditions: *i*) with propanal, cat. MeONa, MeOH, with butan-2-one, cat. NaOH<sub>(aq)</sub>, MeOH; *ii*) Ph<sub>3</sub>P=CHCOCH<sub>3</sub>, reflux. CH<sub>2</sub>Cl<sub>2</sub>; *iii*) CH<sub>2</sub>O<sub>(aq)</sub>, cat. pyrrolidine, cat. CH<sub>3</sub>CH<sub>2</sub>CO<sub>2</sub>H, *i*-PrOH, 45 °C; *iv*) Ph<sub>3</sub>P=C(CH<sub>3</sub>)CO<sub>2</sub>Me, reflux. CH<sub>2</sub>Cl<sub>2</sub>; *v*) LiAlH<sub>4</sub>, THF; *vi*) MnO<sub>2</sub>, reflux. CHCl<sub>3</sub>.

#### (*R,E*)-2-methyl-4-(2,2,3-trimethylcyclopent-3-en-1-yl)but-2-enal (**4a**)

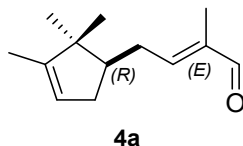

To an ice-cooled and well stirred solution of MeONa (129 mg) in MeOH (5 mL) was added dropwise a mixture of (+)-**2** (3.0 g, 19.7 mmol) and propionaldehyde (3.8 g) at a rate such that the temperature was kept between 5-10 °C (usually over half an hour). After 4 hours the reaction was quenched with acetic acid until neutral pH. Then, Et<sub>2</sub>O (50 mL) was added to the mixture, which was washed in sequence with an aq. solution of NaHCO<sub>3</sub> (sat., 50 mL), HCl (1 M, 50 mL) and brine (sat., 50 mL). The organic layer was dried over anhydrous Na<sub>2</sub>SO<sub>4</sub> and concentrated under *vacuum* affording **4a** as pale-yellow liquid, which was purified by bulb-to-bulb distillation (105 °C, 0.2-0.3 mbar).<sup>13</sup>

Yield 40% (1.5 g) as a colourless oil; *tr* = 17.4 min, 91% purity ( $E > 99\%$ ) by GC-MS; <sup>1</sup>H-NMR (CDCl<sub>3</sub>, 400 MHz):  $\delta$  9.39 (s, 1H), 6.53 (td,  $J = 7.5$  and 1.5 Hz, 1H), 5.22 (m, 1H), 2.46 (m, 1H), 2.39-2.23 (m, 2H), 1.94-1.92 (m, 2H), 1.76 (m, 3H), 1.61 (m, 3H), 1.01 (s, 3H), 0.83 (s, 3H); <sup>13</sup>C{<sup>1</sup>H}-NMR (CDCl<sub>3</sub>, 101 MHz):  $\delta$  195.4, 154.8, 148.5, 139.6, 121.6, 49.7, 47.1, 35.6, 30.0, 26.0, 19.9, 12.7, 9.4; GC-MS: *m/z* (%): 192 (M<sup>+</sup>, 6), 121 (32), 108 (100), 93 (56); [ $\alpha$ ]<sub>D</sub> = +3.6 (CHCl<sub>3</sub>, *c* = 0.5).

#### (*R,E*)-3-methyl-5-(2,2,3-trimethylcyclopent-3-en-1-yl)pent-3-en-2-one (**4c**, Sandex®)

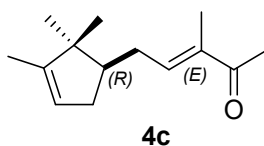

To an ice-cooled and well stirred solution of butan-2-one (15.0 g) in MeOH (25 mL) was added an aq. solution of NaOH (12 M, 5 mL). Then, (+)-**2** (8.0 g) was added dropwise (rate = 0.5 mL/min) to the mixture. After 3 hours, the mixture was left to reach room temperature and then an aq. solution of HCl (1 M) was added dropwise until acidic pH was reached. The reaction mixture was kept under stirring overnight, and then diluted with CH<sub>2</sub>Cl<sub>2</sub> (100 mL). The organic phase was

separated, and the aqueous phase was washed with  $\text{CH}_2\text{Cl}_2$  (3 x 20 mL). The combined organic phase was washed with brine (sat., 40 mL), dried over anhydrous  $\text{Na}_2\text{SO}_4$  and concentrated under *vacuum* to give the crude product, which was isolated by column chromatography in *n*-hexane/EtOAc (97:3) and by *vacuum* distillation (90 °C, 0.2-0.3 mbar), affording **4c**.<sup>14</sup>

Yield 32% (3.5 g) as an almost colourless liquid;  $t_r=18.9$  min, 96% purity (*E/Z*= 96:4) by GC-MS; <sup>1</sup>H-NMR ( $\text{CDCl}_3$ , 400 MHz):  $\delta$  6.68 (tq,  $J = 7.3, 1.4$  Hz, 1H), 5.23 (m, 1H), 2.37 (m, 1H), 2.30 (s, 3H), 2.23 (m, 1H), 1.98-1.81 (m, 2H), 1.79 (q,  $J = 1.1$  Hz, 3H), 1.62 (m, 3H), 1.57 (s, 1H), 1.02 (s, 3H), 0.83 (s, 3H); <sup>13</sup>C{<sup>1</sup>H}-NMR (101 MHz,  $\text{CDCl}_3$ ):  $\delta$  199.9, 148.6, 143.6, 137.8, 121.6, 49.9, 47.1, 35.7, 30.1, 26.0, 25.5, 19.9, 12.7, 11.3; GC-MS:  $m/z$  (%): 206 ( $M^+$ , 12), 136 (64), 109 (72), 98 (100);  $[\alpha]_D = +0.4$  ( $\text{CHCl}_3$ ,  $c = 1.0$ ).

### General procedure for the synthesis of (*S*) or (*R*) enantiomer of (*E*)-5-(2,2,3-trimethylcyclopent-3-en-1-yl)pent-3-en-2-one (**6**)

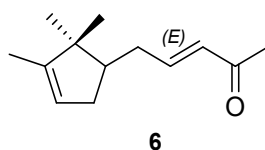

To a refluxing and well stirred solution of  $\text{Ph}_3\text{P}=\text{CHCOCH}_3$  (25.0 g, 79 mmol) in  $\text{CH}_2\text{Cl}_2$  (30 mL) was added the campholenic aldehyde (8.0 g). After 20 hours the reaction mixture was concentrated under *vacuum*, then the crude solid was triturated with a solvent mixture of *n*-hexane/ $\text{Et}_2\text{O}$  (9:1, 100 mL) and filtrated. The organic phase was concentrated under *vacuum* to give the crude product, which was purified by distillation under *vacuum* (110 °C, 0.2-0.3 mbar), affording **6**.<sup>15</sup>

Yield 64% (6.5 g) as an almost colourless liquid;  $t_r=17.6$  min, 92% purity by GC-MS;  $E > 99\%$  by <sup>1</sup>H-NMR; <sup>1</sup>H-NMR ( $\text{CDCl}_3$ , 400 MHz):  $\delta$  6.81 (dt,  $J = 15.9, 7.3$  Hz, 1H), 6.11 (dt,  $J = 15.9, 1.4$  Hz, 1H), 5.22 (m, 1H), 2.38 (m, 1H), 2.24 (s, 3H), 2.17 (m, 1H), 1.96-1.82 (m, 2H), 1.61 (m, 3H), 1.58 (s, 1H), 1.00 (s, 3H), 0.81 (s, 3H); <sup>13</sup>C{<sup>1</sup>H}-NMR (101 MHz,  $\text{CDCl}_3$ ):  $\delta$  198.5, 148.39, 148.36, 131.8, 121.5, 49.4, 47.0, 35.5, 33.6, 26.9, 25.9, 19.8, 12.6; GC-MS:  $m/z$  (%): 192 ( $M^+$ , 3), 159 (35), 108 (100), 93 (87); for (*S*)-**6** (from (–)-pinene, *ee* 82%)  $[\alpha]_D = -2.9$  ( $\text{CHCl}_3$ ,  $c = 1.1$ ); for (*R*)-**6** (from (+)-pinene, *ee* 92% of pinene)  $[\alpha]_D = +3.8$  ( $\text{CHCl}_3$ ,  $c = 1.2$ ).

### (*S*)-2-(2,2,3-trimethylcyclopent-3-en-1-yl)acrylaldehyde (**10**)

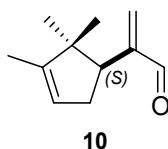

To a stirred solution of (+)-**2** (7.0 g) in *i*-PrOH (7 mL) at 45 °C was added an aqueous solution of formaldehyde (37% w/w, 6.8 mL), pyrrolidine (0.64 g), and propanoic acid (0.67 g). After 4 hours,  $\text{Et}_2\text{O}$  (100 mL) was added to the mixture, which was washed in sequence with an aq. solution of  $\text{NaHCO}_3$  (sat., 50 mL), HCl (1 M, 50 mL) and brine (sat., 50 mL). The organic phase was dried over anhydrous  $\text{Na}_2\text{SO}_4$  and concentrated under *vacuum* affording **10** as a yellow liquid, which was purified by bulb-to-bulb-distillation (90 °C, 0.2-0.3 mbar).<sup>16</sup>

Yield 73% (5.5 g) as a colourless oil;  $t_r = 11.3$  min, 95% purity by GC-MS; <sup>1</sup>H-NMR ( $\text{CDCl}_3$ , 400 MHz):  $\delta$  9.55 (s, 1H), 6.32 (s, 1H), 6.09 (s, 1H), 5.27 (m, 1H), 3.18 (tt,  $J = 8.2$  and 0.9 Hz, 1H), 2.35-2.26 (m, 2H), 1.58 (m, 3H), 1.01 (s, 3H), 0.66 (s, 3H); <sup>13</sup>C{<sup>1</sup>H}-NMR ( $\text{CDCl}_3$ , 101 MHz):  $\delta$  195.2, 151.4, 147.4, 135.5, 121.5, 48.2, 46.6, 34.7, 26.6, 21.7, 12.8; GC-MS:  $m/z$  (%): 164 ( $M^+$ , 43), 149 (100), 107 (93), 93 (86);  $[\alpha]_D = -124.0$  ( $\text{CHCl}_3$ ,  $c = 1.0$ ) vs litt.  $-103.6$  (neat).<sup>17b</sup>

**Methyl (*R,E*)-2-methyl-4-(2,2,3-trimethylcyclopent-3-en-1-yl)penta-2,4-dienoate (**11**)**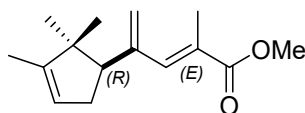**11**

To a refluxing and well stirred solution of **10** (4.0 g) in  $\text{CH}_2\text{Cl}_2$  (50 mL) was added  $\text{Ph}_3\text{P}=\text{C}(\text{CH}_3)\text{CO}_2\text{Me}$  (17.0 g). After 8 hours the reaction mixture was concentrated under *vacuum*, then the crude solid was triturated with a solvent mixture of *n*-hexane/ $\text{Et}_2\text{O}$  (9:1, 50 mL) and filtrated. The organic phase was concentrated under *vacuum* affording **11** as a yellow liquid, which was purified by bulb-to-bulb distillation (120 °C, 0.2-0.3 mbar).

Yield 80% (4.5 g) as a colourless oil;  $t_r = 19.9$  min, 97% purity ( $E > 99\%$ ) by GC-MS;  $^1\text{H-NMR}$  ( $\text{CDCl}_3$ , 400 MHz):  $\delta$  7.15 (t,  $J = 1.6$  Hz, 1H), 5.29 (t,  $J = 1.6$  Hz, 1H), 5.26 (m, 1H), 5.08 (t,  $J = 1.6$  Hz, 1H), 3.75 (s, 3H), 2.63 (tt,  $J = 8.5$  Hz and 0.9 Hz, 1H), 2.32-2.30 (m, 2H), 2.00 (d,  $J = 1.6$  Hz, 3H), 1.58 (m, 3H), 1.02 (s, 3H), 0.71 (s, 3H);  $^{13}\text{C}\{^1\text{H}\}\text{-NMR}$  ( $\text{CDCl}_3$ , 101 MHz):  $\delta$  169.2, 147.7, 145.2, 141.7, 127.5, 121.3, 117.6, 57.0, 51.9, 48.1, 33.4, 26.5, 20.8, 14.4, 12.8; GC-MS:  $m/z$  (%): 234 ( $\text{M}^+$ , 11), 164 (57), 159 (100), 132 (45);  $[\alpha]_D = +65.9$  ( $\text{CHCl}_3$ ,  $c = 1.0$ ).

**(*R,E*)-2-methyl-4-(2,2,3-trimethylcyclopent-3-en-1-yl)penta-2,4-dien-1-ol (**12**)**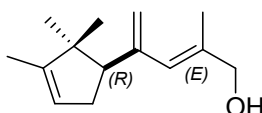**12**

To an ice-cooled and well stirred solution of **11** (4.0 g) in dry THF (30 mL) was portion wise added  $\text{LiAlH}_4$  (325 mg), usually over 30 minutes. Then, the mixture was left to reach room temperature and after 1 hours the reaction was ice-cooled and quenched with a Seignette solution (sat., 30 mL) and left to stir over 1 hour. Then, the mixture was washed with  $\text{EtOAc}$  (3 x 30 mL). The combined organic phase was washed with brine (sat., 30 mL), dried over anhydrous  $\text{Na}_2\text{SO}_4$  and concentrated under *vacuum* affording **12** as a yellow liquid, the product was of sufficient purity to be used in the next step.

Yield > 99% (3.5 g) as a pale-yellow oil;  $t_r = 18.9$  min, 96% purity ( $E > 99\%$ ) by GC-MS;  $^1\text{H-NMR}$  ( $\text{CDCl}_3$ , 400 MHz):  $\delta$  5.92 (m, 1H), 5.25 (m, 1H), 5.12 (m, 1H), 4.95 (t,  $J = 1.6$  Hz, 1H), 4.07 (s, 2H), 2.57 (t,  $J = 8.5$  Hz, 1H), 2.33 (m, 1H), 2.21 (m, 1H), 1.83 (m, 3H), 1.59 (m, 3H), 1.43 (bs, 1H), 1.03 (s, 3H), 0.72 (s, 3H);  $^{13}\text{C}\{^1\text{H}\}\text{-NMR}$  ( $\text{CDCl}_3$ , 101 MHz):  $\delta$  147.7, 145.7, 136.1, 127.8, 121.5, 114.9, 69.2, 57.3, 48.1, 33.6, 26.7, 20.9, 15.7, 12.9; GC-MS:  $m/z$  (%): 206 ( $\text{M}^+$ , 18), 175 (80), 105 (100), 91 (92);  $[\alpha]_D = +40.5$  ( $\text{CHCl}_3$ ,  $c = 0.8$ ).

**(*R,E*)-2-methyl-4-(2,2,3-trimethylcyclopent-3-en-1-yl)penta-2,4-dienal (**4b**)**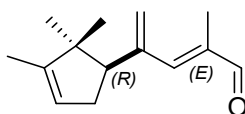**4b**

To a refluxing and well stirred solution of **12** (3.4 g) in  $\text{CHCl}_3$  (30 mL) was added  $\text{MnO}_2$  (17.0 g). After 8 hours the reaction mixture was filtered on a celite pad, which washed with  $\text{CHCl}_3$  (3 x 30 mL). The organic phase was dried over anhydrous  $\text{Na}_2\text{SO}_4$  and concentrated under *vacuum* affording **4b** as a yellow liquid, which was purified by bulb-to-bulb distillation (110 °C, 0.2-0.3 mbar).

Yield > 99% (3.4 g) as a colourless oil;  $t_r = 18.5$ , >99% purity ( $E > 99\%$ ) by GC-MS;  $^1\text{H-NMR}$  ( $\text{CDCl}_3$ , 400 MHz):  $\delta$  9.44 (s, 1H), 6.78 (m, 1H), 5.40 (t,  $J = 1.3$  Hz, 1H), 5.26 (m, 1H), 5.23 (t,  $J = 1.3$  Hz, 1H), 2.69 (td,  $J = 8.2$  and 1.1 Hz, 1H), 2.34-2.31 (m, 2H), 1.89 (d,  $J = 1.5$  Hz, 3H), 1.58 (m, 3H), 1.02 (s, 3H), 0.70 (s, 3H);  $^{13}\text{C}\{^1\text{H}\}\text{-NMR}$  ( $\text{CDCl}_3$ , 101 MHz):  $\delta$  195.7, 151.9, 147.6, 144.7, 138.5, 121.3, 119.3, 57.0, 48.2, 33.6, 26.7, 20.9, 12.7, 11.3; GC-MS:  $m/z$  (%): 204 ( $\text{M}^+$ , 14), 134 (72), 108 (100), 91 (88);  $[\alpha]_D = +112.0$  ( $\text{CHCl}_3$ ,  $c = 1.1$ ).

### Synthesis of $\alpha$ -methylene carbonyl substrates for bioreductions (5a-d)

Unlike to the  $\alpha,\beta$ -unsaturated substrates **4a-c** and **6**, the preparation of  $\alpha$ -methylene carbonyl compounds **5a-d** required a completely new synthetic route (Scheme S3). Our strategy was based on introducing the  $\alpha$  methylene group in the last stage of the synthesis *via* Mannich homologation. The carbon skeleton of Mannich precursors, *i.e.* aldehydes and ketones **16**, **19**, **9** and **23**, was build-up from campholenic aldehyde **2** by Wittig reaction or Claisen rearrangement, followed by standard functional group transformations. This synthetic strategy demonstrated robustness, generality, and in most cases high yields. In contrast, attempts to synthesize the vinyl ketone **5c** by reacting the 1,3-diketone **22** with formaldehyde resulted in unsatisfactory yield, selectivity, and purity.

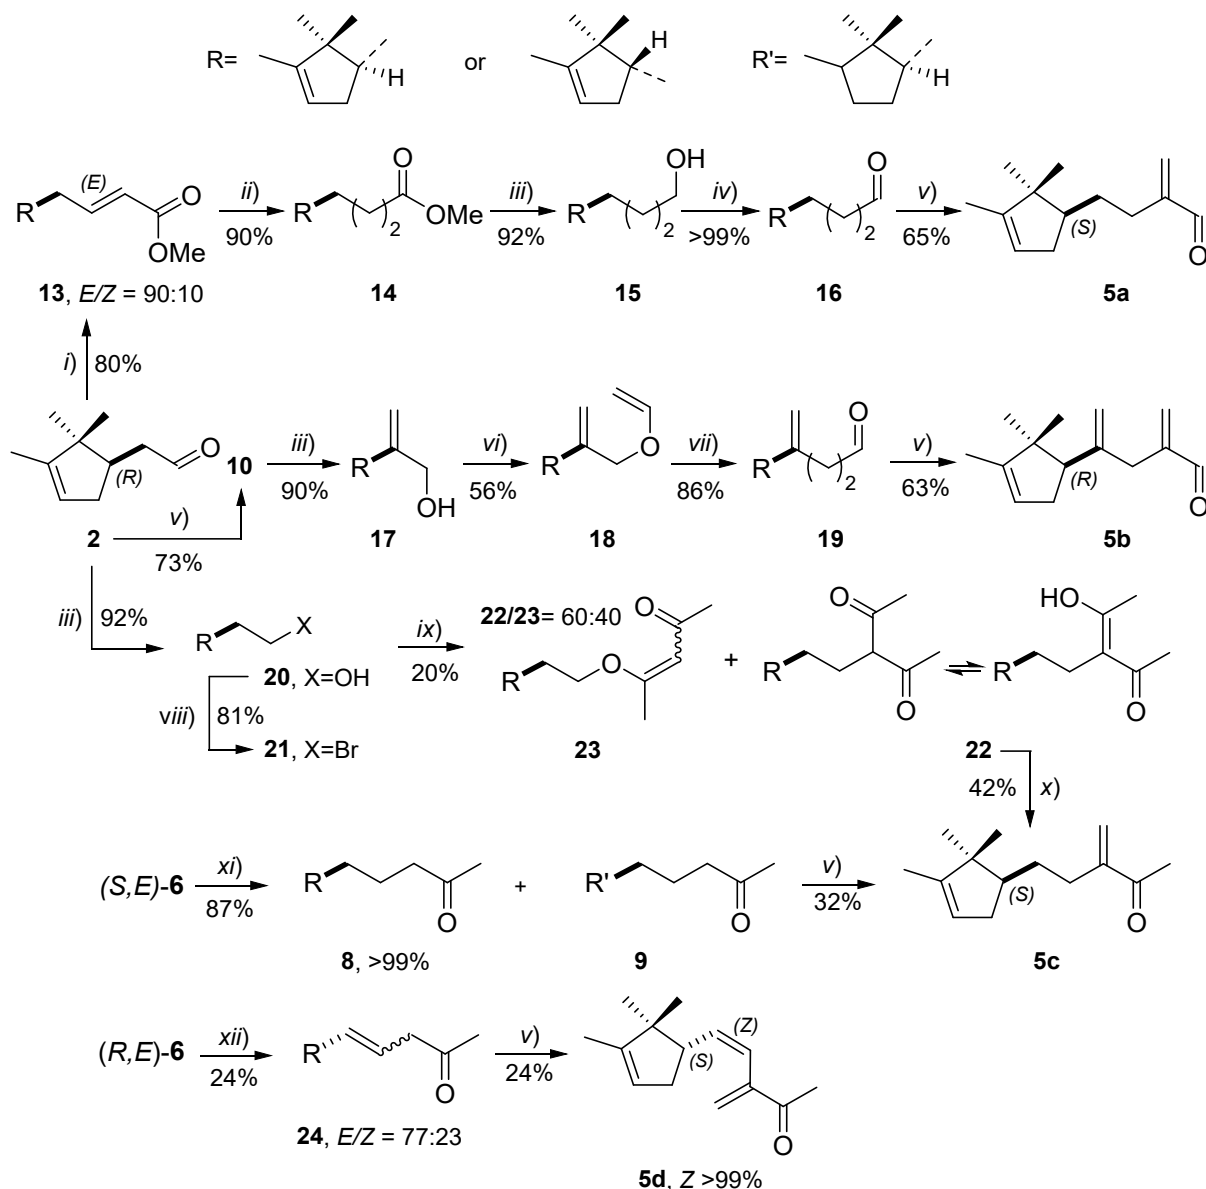

**Scheme S3** Reaction conditions: i)  $\text{Ph}_3\text{P}=\text{CHCO}_2\text{Me}$ ,  $\text{CH}_2\text{Cl}_2$ ; ii) Mg, MeOH; iii)  $\text{LiAlH}_4$ , THF; iv) DMP,  $\text{CH}_2\text{Cl}_2$ ; v)  $\text{CH}_2\text{O}_{(\text{aq})}$ , pyrrolidine,  $\text{CH}_3\text{CH}_2\text{CO}_2\text{H}$ , *i*-PrOH, 45 °C; vi)  $\text{C}_2\text{H}_5\text{OCH}=\text{CH}_2$ , cat.  $\text{Hg}(\text{OAc})_2$ ; vii) 160 °C; viii)  $\text{PPh}_3$ ,  $\text{CBr}_4$ ,  $\text{CH}_2\text{Cl}_2$ ; ix) 2,4-pentandione, cat. TBAI,  $\text{K}_2\text{CO}_3$ , acetone; x)  $\text{CH}_2\text{O}_{(\text{aq})}$ ,  $\text{K}_2\text{CO}_3$ ,  $\text{H}_2\text{O}$ , 35 °C; xi) Different methods were tested (Table S2), the best chemoselectivity was achieved with: OYE2, GDH, glucose, NADPH, KPI buffer, 30 °C; xii) UV irradiation ( $\lambda = 350$  nm), acetone.

**Methyl (*S,E*)-4-(2,2,3-trimethylcyclopent-3-en-1-yl)but-2-enoate (**13**)**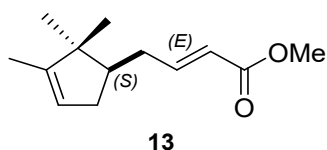

To a well stirred solution of (+)-**2** (4.0 g, 26.3 mmol) in CH<sub>2</sub>Cl<sub>2</sub> (50 mL) was added Ph<sub>3</sub>P=CHCO<sub>2</sub>Me (17.6 g, 52.6 mmol), the mixture was left to stir at room temperature. After 8 hours the reaction mixture was concentrated under *vacuum*, then the crude solid was triturated with a solvent mixture of *n*-hexane/Et<sub>2</sub>O (9:1, 50 mL) and filtrated. The organic phase was concentrated under *vacuum* affording **13** as a yellow liquid, which was purified by bulb-to-bulb distillation (120 °C, 0.2-0.3 mbar).

Yield 80% (4.3 g) as a colourless oil; tr= 18.3 min, 87% purity (*E/Z*= 90:10) by GC-MS; <sup>1</sup>H-NMR (CDCl<sub>3</sub>, 400 MHz): δ 6.98 (dt, *J* = 15.1 and 7.8 Hz, 1H), 5.83 (dt, *J* = 15.1 and 1.6 Hz, 1H), 5.20 (m, 1H), 3.71 (s, 3H), 2.38-2.21 (m, 2H), 2.13 (m, 1H), 1.93-1.79 (m, 2H), 1.59 (m, 3H), 0.98 (s, 3H), 0.78 (s, 3H); <sup>13</sup>C{<sup>1</sup>H}-NMR (CDCl<sub>3</sub>, 101 MHz): δ 167.2, 149.6, 121.6, 121.4, 119.5, 51.4, 49.3, 47.1, 35.6, 33.4, 25.9, 19.9, 12.7; GC-MS: m/z (%): 208 (M<sup>+</sup>, 16), 161 (67), 133 (100), 109 (77); [α]<sub>D</sub> = -0.6 (CHCl<sub>3</sub>, c= 1.0).

**Methyl (*S*)-4-(2,2,3-trimethylcyclopent-3-en-1-yl)butanoate (**14**)**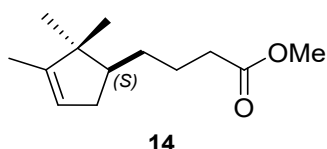

To an ice-cooled and well stirred solution of **13** (3.8 g) in dry MeOH (40 mL) were added magnesium cuttings (2.2 g), after the evolution of H<sub>2</sub> (10 min) the mixture was left to stir at room temperature. After 8 hours the reaction was ice-cooled and quenched with an aq. solution of HCl (3 N, 40 mL), then the mixture was washed with CH<sub>2</sub>Cl<sub>2</sub> (3 x 40 mL). The combined organic phase was washed in sequence with an aq. solution of NH<sub>4</sub>Cl (sat., 50 mL) and brine (sat., 50 mL). The organic layer was dried over anhydrous Na<sub>2</sub>SO<sub>4</sub> and concentrated under *vacuum* affording **14** as pale-yellow oil, which was purified through silica gel column chromatography with *n*-hexane/EtOAc (95:5).<sup>18</sup>

Yield 90% (3.4 g) as pale yellow oil; tr= 17.1 min, 93% purity by GC-MS; <sup>1</sup>H-NMR (CDCl<sub>3</sub>, 400 MHz): δ 5.20 (m, 1H), 3.64 (s, 3H), 2.33-2.29 (m, 2H), 1.76-1.74 (m, 2H), 1.70-1.67 (m, 2H), 1.57 (m, 3H), 1.41 (m, 1H), 1.26-1.24 (m, 2H), 0.94 (s, 3H), 0.72 (s, 3H); <sup>13</sup>C{<sup>1</sup>H}-NMR (CDCl<sub>3</sub>, 101 MHz): δ 174.3, 148.7, 121.7, 51.5, 50.2, 46.9, 35.7, 34.6, 29.7, 25.9, 24.4, 19.8, 12.7; GC-MS: m/z (%): 210 (M<sup>+</sup>, 11), 195 (100), 163 (55), 121 (88); [α]<sub>D</sub> = +9.25 (CHCl<sub>3</sub>, c= 0.8).

**(*S*)-4-(2,2,3-trimethylcyclopent-3-en-1-yl)butan-1-ol (**15**)**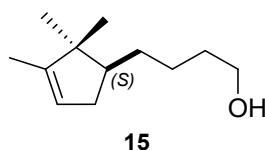

The same procedure used for the synthesis of **12** was adapted for the reduction of **14** (3.4 g).

Yield 92% (2.5 g) as a pale-yellow oil; tr= 14.6 min, 97% purity by GC-MS; <sup>1</sup>H-NMR (CDCl<sub>3</sub>, 400 MHz): δ 5.22 (m, 1H), 3.65 (t, *J* = 6.6 Hz, 2H), 2.30 (m, 1H), 1.84-1.68 (m, 3H), 1.60 (m, 3H), 1.48-1.39 (m, 2H), 1.34-1.23 (m, 3H), 0.97 (s, 3H), 0.75 (s, 3H); <sup>13</sup>C{<sup>1</sup>H}-NMR (CDCl<sub>3</sub>, 101 MHz): δ 148.90, 121.8, 63.2, 50.6, 46.9, 35.8, 33.4, 29.9, 26.0, 25.1, 19.8, 12.7; GC-MS: m/z (%): 182 (M<sup>+</sup>, 13), 180 (33), 147 (100), 121 (88); [α]<sub>D</sub> = +8.5 (CHCl<sub>3</sub>, c= 0.9).

**(S)-4-(2,2,3-trimethylcyclopent-3-en-1-yl)butanal (16)**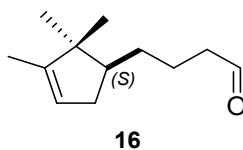

To an ice-cooled and well stirred solution of **15** (2.5 g) in CH<sub>2</sub>Cl<sub>2</sub> (30 mL) was added Dess-Martin reagent (DMP, 6.4 g), then the reaction mixture was left to reach room temperature. After 1 hours the mixture was filtered on a celite pad, which washed with CH<sub>2</sub>Cl<sub>2</sub> (3 X 30 mL). The organic phase was dried over anhydrous Na<sub>2</sub>SO<sub>4</sub> and concentrated under *vacuum* affording **16** as a yellow liquid, the product was of sufficient purity to be used in the next step.

Yield > 99% (2.4 g) as a pale-yellow oil; tr= 15.1, 96% purity by GC-MS; <sup>1</sup>H-NMR (CDCl<sub>3</sub>, 400 MHz): δ 9.77 (t, *J* = 1.8 Hz, 1H), 5.22 (m, 1H), 2.50-2.38 (m, 2H), 2.29 (m, 1H), 1.84-1.66 (m, 3H), 1.61-1.55 (m, 3H+1H), 1.43 (m, 1H), 1.28 (m, 1H), 0.96 (s, 3H), 0.74 (s, 3H); <sup>13</sup>C{<sup>1</sup>H}-NMR (CDCl<sub>3</sub>, 101 MHz): δ 202.8, 148.8, 121.7, 50.4, 46.9, 44.4, 35.7, 29.8, 25.9, 21.5, 19.8, 12.7; GC-MS: m/z (%): 180 (M<sup>+</sup>, 24), 147 (68), 121 (100), 91 (39); [α]<sub>D</sub> = +5.5 (CHCl<sub>3</sub>, c= 0.7).

**(S)-2-methylene-4-(2,2,3-trimethylcyclopent-3-en-1-yl)butanal (5a)**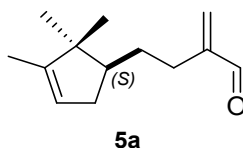

The same procedure used for the synthesis of **10** was adapted for the Mannich homologation of **16** (2.0 g), but the product was purified by silica gel column chromatography purification with *n*-hexane/EtOAc (95:5).

Yield 65% (1.4) as a pale-yellow oil; tr= 16.4, 97% purity by GC-MS; <sup>1</sup>H-NMR (CDCl<sub>3</sub>, 400 MHz): δ 9.54 (s, 1H), 6.27 (td, *J* = 1.4 and 0.9 Hz, 1H), 5.99 (td, *J* = 1.4 and 0.9 Hz, 1H), 5.22 (m, 1H), 2.34-2.31 (m, 2H), 2.18 (m, 1H), 1.89-1.68 (m, 1H+2H), 1.59 (dt, *J* = 2.7 and 1.6 Hz, 3H), 1.40 (m, 1H), 0.96 (s, 3H), 0.75 (s, 3H); <sup>13</sup>C{<sup>1</sup>H}-NMR (CDCl<sub>3</sub>, 101 MHz): δ 194.9, 150.9, 148.8, 133.9, 121.7, 50.1, 46.9, 35.6, 28.4, 27.1, 25.9, 19.9, 12.7; GC-MS: m/z (%): 192 (M<sup>+</sup>, 18), 159 (36), 121 (100), 109 (54); [α]<sub>D</sub> = +10.1 (CHCl<sub>3</sub>, c= 0.8).

**(S)-2-(2,2,3-trimethylcyclopent-3-en-1-yl)prop-2-en-1-ol (17)**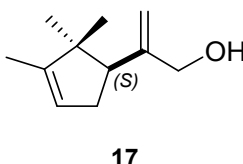

The same procedure used for the synthesis of **12** was adapted for the reduction of **10** (3.3 g).

Yield 90% (3.0 g) as a pale-yellow oil; tr= 13.2 min, 98% purity by GC-MS; <sup>1</sup>H-NMR (CDCl<sub>3</sub>, 400 MHz): δ 5.28 (m, 1H), 5.22 (q, *J* = 1.6 Hz, 1H), 5.00 (quint, *J* = 1.2 Hz, 1H), 4.20-4.02 (m, 2H), 2.59 (t, *J* = 8.7 Hz, 1H), 2.34 (m, 1H), 2.26 (m, 1H), 1.60 (m, 3H), 1.07 (s, 3H), 0.76 (s, 3H); <sup>13</sup>C{<sup>1</sup>H}-NMR (CDCl<sub>3</sub>, 101 MHz): δ 149.7, 147.6, 121.7, 110.7, 66.4, 53.9, 47.9, 34.0, 26.9, 21.1, 12.9; GC-MS: m/z (%): 166 (M<sup>+</sup>, 30), 133 (100), 105 (80), 91 (60); [α]<sub>D</sub> = -78.5 (CHCl<sub>3</sub>, c= 0.8) vs litt. -68.0 (neat).<sup>17a</sup>

**(S)-1,5,5-trimethyl-4-(3-(vinyloxy)prop-1-en-2-yl)cyclopent-1-ene (18)**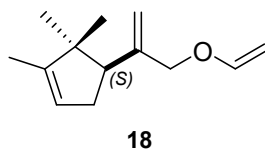

To a well stirred solution of **17** (2.2 g) in ethyl vinyl ether (19.1 mL) was added Hg(AcO)<sub>2</sub> (758 mg), the mixture was left to stir at room temperature. After 4 hours, a solvent mixture of *n*-hexane/Et<sub>2</sub>O (1:1, 20 mL) was added to the reaction, which was washed with H<sub>2</sub>O (3 x 20 mL). The organic phase was dried over anhydrous Na<sub>2</sub>SO<sub>4</sub> and concentrated under

*vacuum* affording **18** as a yellow liquid, which was purified through silica gel column chromatography with *n*-hexane/EtOAc (9:1).<sup>17a</sup>

Yield 56% (1.4 g) as a pale-yellow oil; *tr*= 13.3 min, 98% purity by GC-MS; <sup>1</sup>H-NMR (CDCl<sub>3</sub>, 400 MHz): δ 6.47 (dd, *J* = 14.3 and 6.7 Hz, 1H), 5.29 (m, 1H), 5.25 (qd, *J* = 1.6 and 0.3 Hz, 1H), 5.07 (quint, *J* = 1.6 Hz 1H), 4.23 (dd, *J* = 14.3 and 2.0 Hz, 1H), 4.19 (m, 2H), 4.02 (dd, *J* = 6.7 and 2.0 Hz, 1H), 2.64 (m, 1H), 2.42-2.21 (m, 2H), 1.60 (m, 3H), 1.08 (s, 3H), 0.79 (s, 3H); <sup>13</sup>C{<sup>1</sup>H}-NMR (CDCl<sub>3</sub>, 101 MHz): δ 151.8, 147.5, 145.0, 121.7, 113.5, 87.2, 71.7, 53.8, 47.8, 33.9, 26.9, 21.1, 12.9; GC-MS: *m/z* (%): 192 (M<sup>+</sup>, 8), 133 (92), 105 (86), 93 (100); [α]<sub>D</sub> = -67.2 (CHCl<sub>3</sub>, *c* = 0.8).

#### (*R*)-4-(2,2,3-trimethylcyclopent-3-en-1-yl)pent-4-enal (**19**)

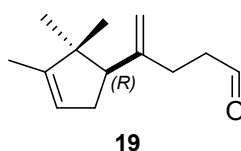

Neat vinyl ether **18** (1.4 g) was left at 160 °C for 2 hours under to an inert atmosphere of Argon. After cooling, the crude product was purified through silica gel column chromatography with *n*-hexane/EtOAc (95:5).<sup>17a</sup>

Yield 86% (1.2 g) as a pale-yellow oil; *tr*= 16.2 min, 98% purity by GC-MS; <sup>1</sup>H-NMR (CDCl<sub>3</sub>, 400 MHz): δ 9.77 (m, 1H), 5.26 (m, 1H), 4.89 (m, 1H), 4.83 (m, 1H), 2.61-2.59 (m, 2H), 2.54 (m, 1H), 2.48-2.33 (m, 2H), 2.31-2.16 (m, 2H), 1.59 (m, 3H), 1.07 (s, 3H), 0.75 (s, 3H); <sup>13</sup>C{<sup>1</sup>H}-NMR (CDCl<sub>3</sub>, 101 MHz): δ 202.3, 148.2, 147.4, 121.6, 111.2, 56.7, 48.1, 42.5, 34.0, 28.7, 27.0, 21.0, 12.9; GC-MS: *m/z* (%): 192 (M<sup>+</sup>, 61), 133 (96), 105 (100), 91 (86); [α]<sub>D</sub> = -76.0 (CHCl<sub>3</sub>, *c* = 0.9).

#### (*R*)-2-methylene-4-(2,2,3-trimethylcyclopent-3-en-1-yl)pent-4-enal (**5b**)

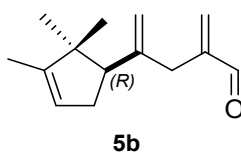

The same procedure used for the synthesis of **10** was adapted for the Mannich homologation of **19** (1.2 g), the product was purified by silica gel column chromatography with *n*-hexane/EtOAc (95:5).

Yield 63% (800 mg) as a pale-yellow oil; *tr*= 17.2 min, 85% purity by GC-MS; <sup>1</sup>H-NMR (CDCl<sub>3</sub>, 400 MHz): δ 9.59 (s, 1H), 6.27 (m, 1H), 6.11 (m, 1H), 5.25 (m, 1H), 4.98 (m, 1H), 4.83 (m, 1H), 3.05-2.98 (m, 2H), 2.53 (m, 1H), 2.28 (m, 1H), 2.18 (m, 1H), 1.58 (m, 3H), 1.08 (s, 3H), 0.81 (s, 3H); <sup>13</sup>C{<sup>1</sup>H}-NMR (CDCl<sub>3</sub>, 101 MHz): δ 194.2, 148.7, 147.5, 146.4, 135.5, 121.5, 113.7, 56.2, 48.1, 35.0, 34.4, 27.0, 21.2, 12.9; GC-MS: *m/z* (%): 204 (M<sup>+</sup>, 50), 189 (83), 105 (77), 91 (100); [α]<sub>D</sub> = -37.8 (CHCl<sub>3</sub>, *c* = 0.6).

#### (*R*)-2-(2,2,3-trimethylcyclopent-3-en-1-yl)ethan-1-ol (**20**)

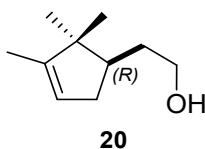

To a refluxing and stirred mixture of LiAlH<sub>4</sub> (760 mg) in dry Et<sub>2</sub>O (140 mL), was added dropwise (rate = 0.5 mL/min) a solution of (+)-**2** (6.0 g) in Et<sub>2</sub>O (40 mL). After completion of the addition, stirring was continued at room temperature for 1 hour. The reaction was ice-cooled and quenched with a Seignette solution (sat., 30 mL) and left to stir over 1 hour. Then, the mixture was washed with EtOAc (3 x 50 mL). The combined organic phase was washed with brine (sat., 50 mL), dried over anhydrous Na<sub>2</sub>SO<sub>4</sub> and concentrated under *vacuum* to get a crude product, which was purified through distillation (145 °C, 10 mbar) affording **20**.

Yield 92% (5.6 g) as a colourless oil; *tr*=11.6 min, 98% purity by GC-MS; <sup>1</sup>H-NMR (CDCl<sub>3</sub>, 400 MHz): δ=5.22 (m, 1H), 3.73 (m, 1H), 3.64 (m, 1H), 2.29 (m, 1H), 1.90-1.69 (m, 1H+2H), 1.61 (m, 3H), 1.52 (m, 1H), 1.34 (m, 1H), 0.98 (s, 3H), 0.78 (s, 3H); <sup>13</sup>C{<sup>1</sup>H}-NMR (CDCl<sub>3</sub>, 101 MHz): δ=148.8, 121.7, 62.8, 47.0, 46.9, 35.7, 33.5, 25.9, 19.9, 12.7; GC-MS: *m/z* (%): 154 (M<sup>+</sup>, 5), 139 (10), 121 (25), 95 (100); [α]<sub>D</sub> = +1.34 (CHCl<sub>3</sub>, *c*=1.1) vs litt. +5.4 (CHCl<sub>3</sub>, *c* = 2.06).<sup>19</sup>

**(R)-4-(2-bromoethyl)-1,5,5-trimethylcyclopent-1-ene (21)**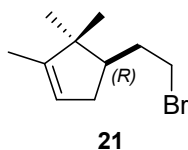

To an ice-cooled stirred solution of  $\text{PPh}_3$  (22.4 g) in  $\text{CH}_2\text{Cl}_2$  (200 mL) were added  $\text{CBr}_4$  (28.4 g) and **20** (6.6 g). The reaction mixture was stirred at the same temperature under an inert atmosphere ( $\text{N}_2$ ) for 30 min. The cooling bath was removed, the mixture was allowed to reach the room temperature and the stirring continued for 20 h. Then the crude solid was triturated with a solvent mixture of *n*-hexane/ $\text{Et}_2\text{O}$  (9:1, 100 mL) and filtrated. The organic phase was concentrated under *vacuum* to get the crude product, which was purified through silica gel column chromatography with *n*-hexane affording **21**.

Yield 81% (7.5 g) as a pale-yellow oil;  $\text{tr}=13.2$  min, 83% purity by GC-MS;  $^1\text{H-NMR}$  ( $\text{CDCl}_3$ , 400 MHz):  $\delta=5.23$  (m, 1H), 3.50 (ddd,  $J = 9.6, 8.6$  and  $4.7$  Hz, 1H), 3.35 (dt,  $J = 9.6$  and  $7.9$  Hz, 1H), 2.32 (m, 1H), 2.05-1.79 (m, 2H+2H), 1.61 (m, 3H), 1.00 (s, 3H), 0.78 (s, 3H);  $^{13}\text{C}\{^1\text{H}\}\text{-NMR}$  ( $\text{CDCl}_3$ , 101 MHz):  $\delta= 148.8, 121.7, 62.8, 47.0, 46.9, 35.7, 33.5, 25.9, 19.9, 12.7$ ; GC-MS:  $m/z$  (%): 217 ( $\text{M}^+$ , 2), 203 (98), 201 (100), 121 (15);  $[\alpha]_D = +13.4$  ( $\text{CHCl}_3$ ,  $c=1.2$ ) vs litt.  $+24$  ( $\text{CHCl}_3$ ,  $c=0.69$ ).<sup>20</sup>

**(S)-3-(2-(2,2,3-trimethylcyclopent-3-en-1-yl)ethyl)pentane-2,4-dione (22) and (R)-4-(2-(2,2,3-trimethylcyclopent-3-en-1-yl)ethoxy)pent-3-en-2-one (23)**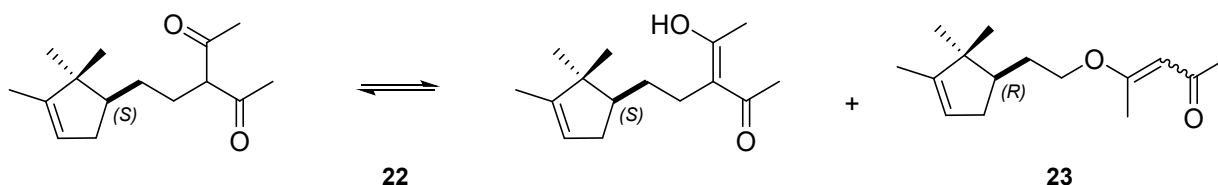

To a stirred mixture of **21** (2.0 g), TBAI (1.03 g), and  $\text{K}_2\text{CO}_3$  (1.9 g) in acetone (20 mL) was added acetylacetone (0.92 g, 9.2 mmol). After 22 hours, the reaction mixture was diluted with brine (sat., 100 mL) and ice cooled. An aq. solution of HCl (1 M) was added until 5 to 6 pH was reached. The mixture was washed with  $\text{EtOAc}$  (3 x 20 mL), and the combined organic phase was washed with brine (sat., 20 mL). The organic phase was dried over anhydrous  $\text{Na}_2\text{SO}_4$  and concentrated under *vacuum* to get a crude product which was purified through silica gel column chromatography with *n*-hexane/ $\text{EtOAc}$  (95:5) affording **22** as a mixture of enol and diketone.<sup>21</sup>

Compound **22**. Yield 20% (440 mg) as a pale-yellow oil;  $\text{tr}=20.4$  min, 68% purity by GC-MS;  $^1\text{H-NMR}$  ( $\text{CDCl}_3$ , 400 MHz):  $\delta$  16.64 (s, enol, 0.5H), 5.24 (m, diketone, 0.55H), 5.22 (m, enol, 0.45H), 3.62 (t,  $J = 7.2$  Hz, diketone, 0.5H), 2.44-2.19 (m, diketone+enol, 2H), 2.18 (d,  $J = 2.0$  Hz, enol, 2.7H), 2.14 (s, diketone, 3.3H), 1.97-1.66 (m, diketone+enol, 1H+2H), 1.62-1.58 (m, diketone+enol 3H), 1.40-1.13 (m, diketone+enol, 2H), 0.98 (s, diketone, 1.65H), 0.95 (s, enol, 1.35H), 0.76 (s, diketone, 1.65H), 0.72 (s, enol, 1.35H);  $^{13}\text{C}\{^1\text{H}\}\text{-NMR}$  ( $\text{CDCl}_3$ , 101 MHz):  $\delta$  204.6 (CO enol), 191.0 (CO diketone), 148.9, 148.8, 121.6, 121.5, 111.0 ( $\text{C}_q$  enol), 69.6 (COCHCO diketone), 50.9, 50.4, 47.03 ( $\text{C}_q$ ), 46.96 ( $\text{C}_q$ ), 35.8, 35.6, 31.4, 29.2, 29.1, 28.1, 27.8, 27.3, 26.1, 26.0, 23.0, 19.82, 19.80, 12.72, 12.70. GC-MS:  $m/z$  (%): 218 ( $[\text{M}-18]^+$ , 1), 175 (29), 134 (100), 121 (51).

Compound **23**. Yield 16% (348 mg) as a pale-yellow oil;  $\text{tr}= 21.8$  min, 43% purity by GC-MS. Due to the low purity of **23** we report only  $^{13}\text{C}\{^1\text{H}\}\text{-NMR}$  ( $\text{CDCl}_3$ , 101 MHz):  $\delta$  197.2, 172.4, 148.7, 121.6, 99.9, 68.0, 47.2, 47.1, 35.6, 32.0, 29.3, 25.8, 19.8, 12.7; GC-MS:  $m/z$  (%): 236 ( $\text{M}^+$ , 1), 121 (58), 108 (100), 93 (67).



**(S)-5-(2,2,3-trimethylcyclopent-3-en-1-yl)pentan-2-one (8)**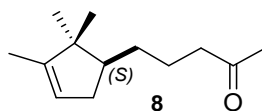

Different reductive methodologies were tested, in the following we report the procedures according to Table S2. The most performing procedure in terms of chemoselectivity resulted the OYE2 catalyzed bioreduction.

**Table S2** Reduction of (S)-6 with different methodologies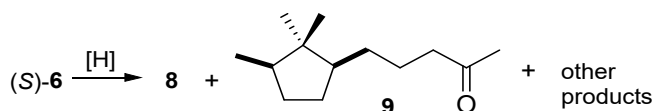

| Reaction conditions <sup>a</sup>                                                                           | Conv.<br>[%] <sup>b</sup> | Prod. Distribution<br>[%] <sup>b</sup> |    |                          |
|------------------------------------------------------------------------------------------------------------|---------------------------|----------------------------------------|----|--------------------------|
|                                                                                                            |                           | 8                                      | 9  | Other prod. <sup>c</sup> |
| <b>A)</b> OYE2, GDH, 0.009 eq NADP <sup>+</sup> , 3.9 eq glucose, pH 7.0 KPi/ <i>i</i> -PrOH (99:1), 30 °C | 96 (87) <sup>d</sup>      | >99                                    | -  | -                        |
| <b>B)</b> 0.15 eq Pd/C, <sup>e</sup> NH <sub>4</sub> HCO <sub>2</sub> , MeOH, 30 °C                        | >99 (67) <sup>d</sup>     | 95                                     | 4  | 1                        |
| <b>C)</b> 0.2 eq Raney <sup>®</sup> -Ni, pyridine, EtOH, rt                                                | 90                        | 28                                     | 72 | -                        |
| <b>D)</b> 5 eq Mg, MeOH, rt                                                                                | - <sup>f</sup>            | -                                      | -  | -                        |
| <b>E)</b> 0.25 eq Lindlar cat., H <sub>2</sub> , <sup>g</sup> MeOH, 50 °C                                  | 15                        | 84                                     | -  | 16                       |
| <b>F)</b> 0.1 eq Wilkinson cat., H <sub>2</sub> , <sup>g</sup> CH <sub>2</sub> Cl <sub>2</sub> , 36 °C     | -                         | -                                      | -  | -                        |
| <b>G)</b> 3 eq NaBH <sub>4</sub> , 5 eq NiCl <sub>2</sub> ·6H <sub>2</sub> O, MeOH/H <sub>2</sub> O, rt    | 93                        | 97                                     | 2  | 1                        |

<sup>a</sup> Catalyst/substrate ratio is in weight/weight. <sup>b</sup> Not isolated yield, by GC-MS. <sup>c</sup> By GC-MS. <sup>c</sup> Other products are allylic alcohol, saturated alcohol, positional isomers. <sup>d</sup> Isolated yield without column chromatography. <sup>e</sup> 5% w/w. <sup>f</sup> Decomposition. <sup>g</sup> Pressure 1 atm.

**Procedures****A) OYE2 catalysed reduction**

A solution of (S)-6 (576 mg) in *i*-PrOH (0.8 mL) was added to a KPi buffer solution (pH 7.0, 50 mM, 15 mL) containing OYE2 (≈3 mg/mL, 5 mL), GDH (200 U), glucose (2.1 g), NADP<sup>+</sup> (20 mg). The mixture was incubated for 10-12 hours in an orbital shaker (150 rpm, 30 °C). The reaction was monitored by TLC until complete conversion, eventually, more enzymes were added to increase the conversion. Then, XAD-1180 resins (5.0 g) were added to the reaction mixture and left to shaker for 30 minutes. The mixture was filtered into a porous filter (porosity 0) and the resins were washed several times with EtOAc (15 mL x 4). The combined organic phase was washed with water (10 mL), dried over anhydrous Na<sub>2</sub>SO<sub>4</sub>, and the solvent was removed under reduced pressure. The crude material was submitted to bulb-to-bulb distillation affording **8** (90 °C, 0.2-0.3 mbar).

Yield 87% (512 mg) as a colourless oil; tr=16.4 min, 96% purity by GC-MS; <sup>1</sup>H-NMR (CDCl<sub>3</sub>, 400 MHz): δ=5.16 (m, 1H), 2.40 (m, 2H), 2.24 (m, 1H), 2.08 (s, 3H), 1.80-1.57 (m, 1H+2H), 1.54 (m, 3H), 1.50-1.30 (m, 2H), 1.18 (m, 1H), 0.91 (s, 3H), 0.68 (s, 3H); <sup>13</sup>C{<sup>1</sup>H}-NMR (CDCl<sub>3</sub>, 101 MHz): δ=209.0, 148.6, 121.7, 50.3, 46.8, 44.1, 35.6, 29.8, 29.6, 25.9, 23.1, 19.7, 12.6; GC-MS: m/z (%): 194 (M<sup>+</sup>, 17), 161 (43), 121 (100), 109 (50); [α]<sub>D</sub> = +6.6 (CHCl<sub>3</sub>, c=0.9).

**B) Reduction catalysed by Pd/C in presence of NH<sub>4</sub>HCO<sub>2</sub>**

To a stirred mixture of (S)-6 (5.5 g) and NH<sub>4</sub>HCO<sub>2</sub> (10 g) in MeOH (200 mL) was added Pd/C (5% w/w, 890 mg). The reaction mixture was stirred at 30 °C for 4 hours. Then, the reaction mixture was filtered on a celite pad and washed with MeOH (5 x 10 mL). The solvent was removed under *vacuum* and the crude material was diluted with *n*-hexane (100 mL) and filtered. The organic solution was washed with brine (sat., 20 mL), dried over anhydrous Na<sub>2</sub>SO<sub>4</sub>, and the solvent

was removed under reduced pressure. Finally, the crude material was submitted to bulb-to-bulb distillation affording **8** (90 °C, 0.2-0.3 mbar).<sup>22</sup>

Yield 67% (3.7 g) as colourless oil; tr=16.4 min, 91% purity by GC-MS.

### C) Reduction catalysed by Pd/C in presence of NH<sub>4</sub>HCO<sub>2</sub>

To a stirred mixture of Raney<sup>®</sup>-Ni (40 mg) and pyridine (47.4 mg) in EtOH (5 mL) was added a solution of (*S*)-**6** (192 mg) in EtOH (5 mL). The reaction mixture was stirred at room temperature for 5 hours. Product not isolated.

### D) Reduction with Mg/MeOH

The same procedure used for the synthesis of **14** was adapted for the reduction of (*S*)-**6** (192 mg). Product not isolated.

### E) Hydrogenation catalyzed by Lindlar catalyst

To a stirred solution of (*S*)-**6** (100 mg) in MeOH (5 mL) was added the Lindlar catalyst (25 mg), the reaction was left under an H<sub>2</sub> atmosphere (1 atm) at 50 °C for 24 hours. Product not isolated.

### F) Hydrogenation catalyzed by Wilkinson catalyst

To a stirred mixture of Wilkinson catalyst (10 mg) in dry CH<sub>2</sub>Cl<sub>2</sub> (2 mL), under H<sub>2</sub> atmosphere (1 atm), was added a solution of (*S*)-**6** (100 mg) in CH<sub>2</sub>Cl<sub>2</sub> (3 mL). The reaction mixture was stirred at 36 °C for 24 hours. Product not isolated.<sup>23</sup>

### G) Reduction with NiCl<sub>2</sub>/NaBH<sub>4</sub>

To a stirred mixture of (*S*)-**6** (100 mg), NiCl<sub>2</sub>·6H<sub>2</sub>O (600 mg), H<sub>2</sub>O (1 mL) in MeOH (6 mL) was added NaBH<sub>4</sub> (60 mg). The reaction mixture was stirred at room temperature for 5 hours. Product not isolated.<sup>24</sup>

## (*S*)-3-methylene-5-(2,2,3-trimethylcyclopent-3-en-1-yl)pentan-2-one (**5c**)

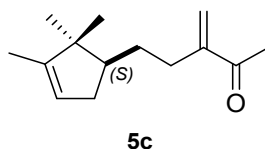

### Route A: Deacylation/methylenation of **22**

To a stirred mixture of **22** (440 mg) and K<sub>2</sub>CO<sub>3</sub> (700 mg) in H<sub>2</sub>O (0.2 mL) was added an aq. of formaldehyde (37% w/w, 0.5 mL) at 35 °C, and left to stir for 18 hours. Then, it was quenched with an aq. solution of HCl (1 M) until pH 7. The mixture was washed with EtOAc (3 x 10 mL) and the combined organic phase was washed with brine (sat., 10 mL), dried over anhydrous Na<sub>2</sub>SO<sub>4</sub> and concentrated under *vacuum* to get a crude product. The latter was purified through silica gel column chromatography with *n*-hexane/EtOAc (95:5) affording **5c**.<sup>25</sup>

Yield 42% (160 mg) as a pale-yellow oil; tr=17.7 min, 96% purity by GC-MS.

### Route B: Mannich of **8**

To a stirred solution of **8** (4.9 g) in *i*-PrOH (9 mL) were added an aqueous solution of formaldehyde (37% w/w, 10.3 mL), pyrrolidine (1.6 g) and propanoic acid (2.0 g) at 45 °C. After 24 hours, *n*-hexane (50 mL) was added to the mixture, which was washed in sequence with aq. solution of HCl (1 M, 30 mL), an aq. solution of NaHCO<sub>3</sub> (sat., 30 mL) and brine (sat., 30 mL). The organic phase was dried over anhydrous Na<sub>2</sub>SO<sub>4</sub> and concentrated under *vacuum* affording **5c** as a yellow liquid, which was purified through silica gel column chromatography with *n*-hexane/EtOAc (98:2).

Yield 32% (1.65 g) as a colourless oil; tr=17.7 min, 98% purity by GC-MS; <sup>1</sup>H-NMR (CDCl<sub>3</sub>, 400 MHz): δ=5.95 (s, 1H), 5.73 (s, 1H), 5.17 (m, 1H), 2.29 (m, 1+3H), 2.14 (m, 1H), 1.79 (m, 1H), 1.68 (m, 1H), 1.55 (m, 3H), 1.53-1.46 (m, 1H), 1.49 (m, 2H), 0.92 (s, 3H), 0.71 (s, 3H); <sup>13</sup>C{<sup>1</sup>H}-NMR (CDCl<sub>3</sub>, 101 MHz): δ=199.7, 149.7, 148.6, 124.5, 121.7, 50.1, 46.8, 35.6, 29.8, 29.0, 26.0, 25.9, 19.7, 12.6; GC-MS: m/z (%): 206 (M<sup>+</sup>, 30), 173 (40), 122 (100), 107 (75); [α]<sub>D</sub> = +14.0 (CHCl<sub>3</sub>, c=1.1).

## (*S,E,Z*)-5-(2,2,3-trimethylcyclopent-3-en-1-yl)pent-4-en-2-one (**24**)

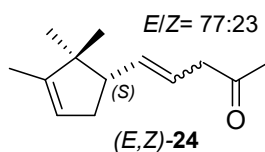

The O<sub>2</sub> of a solution of (*R*)-**6** (250 mg) in acetone (100 mL) in a quartz tube was purged by bubbling N<sub>2</sub> (5 min). Then, the solution was irradiated in a Rayonet photoreactor (λ = 350 nm) for 18 hours. The solution was concentrated under *vacuum* to get the crude product, which was purified through silica gel column chromatography with *n*-hexane/EtOAc (9:1) affording **24**.<sup>26</sup>

Yield 24% (60 mg) as a pale-yellow liquid;  $t_r$ =16.0 min, 82% purity by GC-MS;  $E/Z$ = 77:23 by  $^{13}\text{C}$ -NMR;  $^1\text{H-NMR}$  ( $\text{CDCl}_3$ , 400 MHz):  $\delta$ =5.69-5.48 (m,  $E+Z$ , 2H), 5.21 (m,  $E+Z$ , 1H), 3.29-3.3.11 (m,  $E+Z$ , 2H), 2.68 (q,  $J$  = 8.8 Hz, Z, 0.23H), 2.40 (dd,  $J$  = 9.4 and 7.6 Hz,  $E$ , 0.77H), 2.30-1.96 (m,  $E+Z$ , 2H+3H), 1.59 (m,  $E+Z$ , 3H), 0.95 (s,  $E$ , 2.31H), 0.94 (s, Z, 0.69H), 0.80 (s, Z, 0.69H), 0.74 (s,  $E$ , 2.31H);  $^{13}\text{C}\{^1\text{H}\}$ -NMR ( $\text{CDCl}_3$ , 101 MHz) ( $E$ )-**24**:  $\delta$ =207.5, 148.1, 136.3, 122.6, 121.5, 54.2, 48.8, 48.0, 35.4, 31.4, 25.5, 20.6, 12.8; ( $Z$ )-**24**:  $\delta$ =207.0, 148.2, 135.0, 121.7, 121.6, 50.5, 48.4, 48.3, 36.1, 31.4, 26.0, 20.4, 12.7; GC-MS:  $m/z$  (%): 192 ( $M^+$ , 33), 134 (100), 119 (92), 93 (58);  $[\alpha]_D = +58.3$  ( $\text{CHCl}_3$ ,  $c=0.9$ ).

**(*S,Z*)-3-methylene-5-(2,2,3-trimethylcyclopent-3-en-1-yl)pent-4-en-2-one (5d)**

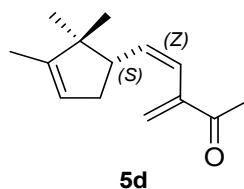

To a stirred solution of **23** (1.60 g, 8.3 mmol) in *i*-PrOH (3 mL) were added an aqueous solution of formaldehyde (37% w/w, 3.4 mL, 45.6 mmol), pyrrolidine (540 mg, 7.6 mmol) and propanoic acid (700 mg, 9.5 mmol) at 45 °C. After 6 hours, *n*-hexane (20 mL) was added to the mixture, which was washed in sequence with HCl (1 M, 10 mL), an aqueous solution of  $\text{NaHCO}_3$  (sat., 10 mL) and brine (sat., 10 mL). The organic phase was dried over anhydrous  $\text{Na}_2\text{SO}_4$  and concentrated under *vacuum* affording **5d** as a yellow liquid, which was purified through silica gel column chromatography with *n*-hexane/EtOAc (98:2).<sup>16</sup>

Yield 24% (400 mg) as a pale-yellow liquid;  $t_r$ =17.4 min, 47% purity by GC-MS;  $Z>99\%$  by  $^1\text{H}$ -NMR;  $^1\text{H-NMR}$  ( $\text{CDCl}_3$ , 400 MHz):  $\delta$  6.21 (dt,  $J$  = 11.4 and 1.1 Hz, 1H), 6.08 (m, 1H), 5.80 (t,  $J$  = 11.4 Hz, 1H), 5.75 (m, 1H), 5.22 (m, 1H), 2.81 (dt,  $J$  = 11.1 and 8.3 Hz, 1H), 2.34 (s, 3H), 1.60 (m, 2H+3H), 0.90 (s, 3H), 0.85 (s, 3H);  $^{13}\text{C}\{^1\text{H}\}$ -NMR ( $\text{CDCl}_3$ , 101 MHz):  $\delta$  199.7, 148.3, 144.8, 136.3, 125.5, 125.4, 121.5, 48.9, 48.7, 36.5, 26.6, 26.0, 20.6, 12.6; GC-MS:  $m/z$  (%): 204 ( $M^+$ , 21), 161 (50), 108 (100), 91 (67);  $[\alpha]_D = +24.0$  ( $\text{CHCl}_3$ ,  $c=0.9$ ).

### Evaluation of ER stereoselectivity from the diastereomeric excess by mass balance

To quantify the ER stereoselectivity (enantioselectivity, *Sel*) from the diastereomeric ratio of products, determined either by means of <sup>13</sup>C-NMR spectroscopy (Brahmanol<sup>®</sup> and Firsantol<sup>®</sup> and Ebanol<sup>®</sup>) or of GC-MS (Sandalore<sup>®</sup>), a mass balance analysis was carried out (Fig. S1). The reduction of the C=C double bond of enantiomerically enriched substrates like **4a-c** or **5a-d** leads always to the formation of a couple of diastereoisomers. However, if the reduction occurs with complete enantioselectivity (100%), the proportion between the product diastereoisomers must be equal to the initial proportion between the enantiomers. If the initial enantiomeric excess of pinene (*ee*<sub>pinene</sub>) is retained during all synthesis, and that ER selectivity is not influenced by stereochemistry of precursor, it is possible to establish a relationship between the area of peaks (%*Pk*<sub>1</sub> or %*Pk*<sub>2</sub>) and the ER enantioselectivity (*Sel*). The following demonstration outlines such relationship.

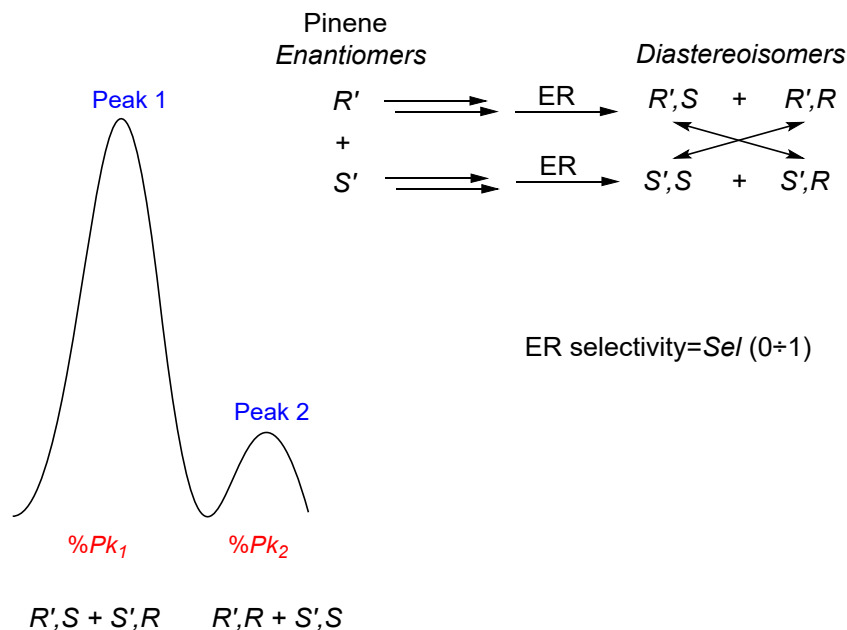

**Figure S1** Example of GC chromatogram of a mixture of two diastereoisomers.

$$\%Pk_1 = \frac{[R',S] + [S',R]}{[R',S] + [S',R] + [R',R] + [S',S]} \cdot 100 = \frac{\%R' \cdot Sel + \%S'(1 - Sel)}{\%R' \cdot Sel + \%S'(1 - Sel) + \%R'(1 - Sel) + \%S' \cdot Sel} \cdot 100$$

Where %*R'* and %*S'* represent the molar percentages of (*R'*)- $\alpha$ -pinene and (*S'*)- $\alpha$ -pinene in the starting  $\alpha$ -pinene. Given that %*R'* + %*S'* = 100 and after some manipulation of the above eq., *Sel* can be determined from the following equation:

$$Sel = \frac{\%Pk_1 - 100 + \%R'}{2 \cdot \%R' - 100}$$

Considering that *ee*<sub>pinene</sub> = %*R'* - %*S'*, and that %*R'* = 0.5 (*ee*<sub>pinene</sub> + 100), *Sel* can be expressed as:

$$Sel = \frac{2 \cdot \%Pk_1 + ee_{pinene} - 100}{2 \cdot ee_{pinene}}$$

**General procedure for the screening of the ER catalyzed reduction of 4c and 5c**

To a solution of substrate (**4c** or **5c**) in DMSO (10  $\mu$ L, 500 mM) in KPi buffer solution (1.0 mL, 50 mM, pH 7.0) containing glucose (3.6 mg, 20  $\mu$ mol), NADP<sup>+</sup> (0.1  $\mu$ mol), GDH (4 U), was added an ene-reductase (80-120  $\mu$ g mL<sup>-1</sup>) according to Table S3 and S4. The mixture was incubated for 24 h in an orbital shaker (150 rpm, 30 °C). The solution was extracted with EtOAc (2x250  $\mu$ L), centrifuging after each extraction (15000 *g*, 1.5 min), and the combined organic solutions were dried over Na<sub>2</sub>SO<sub>4</sub>, and submitted to GC-MS analysis. Conversion and selectivity are summarized in Table S3 and S4.

**Table S3** Reduction of **4c**

| Enzyme | I° Peak<br>31.4 min<br>(%) | II° Peak<br>31.6 min<br>(%) | Sel <i>pro-S</i> vs <i>pro-R</i> | Conversion<br>(%) |
|--------|----------------------------|-----------------------------|----------------------------------|-------------------|
| OYE 1  | 83                         | 17                          | 90:10                            | 91                |
| OYE 2  | 86                         | 14                          | 94:6                             | 100               |
| OYE 3  | 85                         | 15                          | 93:7                             | 92                |
| YqjM   | 57                         | 43                          | 58:42                            | 85                |
| NemA   | 18                         | 82                          | 11:89                            | 47                |

**Table S4** Reduction of **5c**

| Enzyme | I° Peak<br>31.4 min<br>(%) | II° Peak<br>31.6 min<br>(%) | Sel <i>pro-S</i> vs <i>pro-R</i> | Conversion<br>(%) |
|--------|----------------------------|-----------------------------|----------------------------------|-------------------|
| OYE 1  | 15                         | 85                          | 7:93                             | 84                |
| OYE 2  | 14                         | 86                          | 6:94                             | 100               |
| OYE 3  | 10                         | 90                          | 1:99                             | 72                |
| YqjM   | 9                          | 91                          | 1:99                             | 45                |
| NemA   | 19                         | 81                          | 12:88                            | 53                |

## Bioreductions at preparative scale

## General procedure for the enzymatic cascade reduction

A solution of substrate (3.0 mmol) in *i*-PrOH (0.8 mL) was added to a KPi buffer solution (pH 7.0, 50 mM, 15 mL) containing OYE2 ( $\approx$ 3 mg/mL, 5 mL), GDH (200 U), glucose (4.2 g), NADP<sup>+</sup> (20 mg). The mixture was incubated for 10-12 hours in an orbital shaker (150 rpm, 30 °C). The reaction was monitored by TLC until complete conversion. Eventually, more enzymes were added to increase the conversion. After 10-12 hours ADH (Evo270 or Evo440, 30-40 mg) and NADP<sup>+</sup> (10 mg) were added to the reaction mixture. After 10-12 hours XAD-1180 resins (5.0 g) were added to the reaction mixture and left to shaker for 30 minutes. The mixture was filtered into a porous filter (porosity 0) and the resins were washed several times with EtOAc (15 mL x 4). The combined organic phase was washed with water (10 mL), dried over Na<sub>2</sub>SO<sub>4</sub>, and the solvent was removed under reduced pressure. The crude material was submitted to silica gel column chromatography purification and then distilled by bulb-to-bulb apparatus affording alcohol **1**. In Table S5 are reported diastereomeric ratio (*dr*) and OYE2 selectivity.

Table S5 OYE2 stereoselectivity

| Substrate | $\alpha$ -Pinene<br>%S':%R' or<br><i>ee</i> (%) | Product                                         | <i>dr</i>          | Selectivity OYE2             |
|-----------|-------------------------------------------------|-------------------------------------------------|--------------------|------------------------------|
| <b>4a</b> |                                                 | (2 <i>S</i> , <i>S'</i> )- <b>1a</b>            | 90:10 <sup>a</sup> | 99( <i>S</i> ):1( <i>R</i> ) |
| <b>5a</b> |                                                 | (2 <i>R</i> , <i>S'</i> )- <b>1a</b>            | 87:13 <sup>a</sup> | 95( <i>R</i> ):5( <i>S</i> ) |
| <b>4b</b> | 91( <i>S'</i> ):9( <i>R'</i> )                  | (2 <i>S</i> , <i>R'</i> )- <b>1b</b>            | 92:8 <sup>a</sup>  | >99( <i>S</i> )              |
| <b>5b</b> | 82                                              | (2 <i>R</i> , <i>R'</i> )- <b>1b</b>            | 91:9 <sup>a</sup>  | >99( <i>R</i> )              |
| <b>4c</b> |                                                 | (3 <i>S</i> , <i>S'</i> )- <b>7c</b>            | 86:14 <sup>b</sup> | 94( <i>S</i> ):6( <i>R</i> ) |
| <b>5c</b> |                                                 | (3 <i>R</i> , <i>S'</i> )- <b>7c</b>            | 86:14 <sup>b</sup> | 94( <i>R</i> ):6( <i>S</i> ) |
| <b>5d</b> | 4( <i>S'</i> ):96( <i>R'</i> )<br>92            | (3 <i>R</i> , <i>S'</i> , <i>Z</i> )- <b>7d</b> | 96:4 <sup>c</sup>  | >99( <i>R</i> )              |

<sup>a</sup> By ratio of <sup>13</sup>C-NMR signal integrations C(1) for **1a-b**. <sup>b</sup> By GC-MS. <sup>c</sup> By <sup>13</sup>C-NMR signal integration CH<sub>2</sub>.

**(S)-2-methyl-4-((S)-2,2,3-trimethylcyclopent-3-en-1-yl)butan-1-ol (2*S*,*S'*-1a)**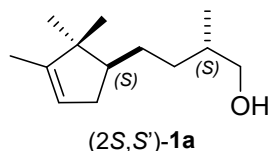

Yield 84% (494 mg) as a colourless oil; *tr*= 17.3 min, >99% purity by GC-MS; *dr*= 90:10 by <sup>13</sup>C-NMR; <sup>1</sup>H-NMR (CDCl<sub>3</sub>, 400 MHz):  $\delta$  5.21 (m, 1H), 3.52 (dd, *J* = 10.4 and 5.6, 1H), 3.41 (dd, *J* = 10.4 and 6.6 Hz, 1H), 2.28 (m, 1H), 1.80 (m, 1H), 1.72-1.63 (m, 2H), 1.59 (m, 3H), 1.54-1.42 (m, 2H), 1.18 (m, 1H), 1.05 (m, 1H), 0.96 (s, 3H), 0.93 (d, *J* = 6.7 Hz, 3H), 0.75 (s, 3H); <sup>13</sup>C{<sup>1</sup>H}-NMR (CDCl<sub>3</sub>, 101 MHz):  $\delta$  148.7, 121.8, 68.5, 50.6, 46.8, 36.1, 35.7, 32.3, 27.3, 25.9, 19.8, 16.6, 12.6; GC-MS: *m/z* (%): 196 (M<sup>+</sup>, 21), 181 (100), 107 (79), 95 (42); [ $\alpha$ ]<sub>D</sub> = +2.5 (CHCl<sub>3</sub>, *c* = 0.65)

**(R)-2-methyl-4-((S)-2,2,3-trimethylcyclopent-3-en-1-yl)butan-1-ol (2*R*,*S'*-1a)**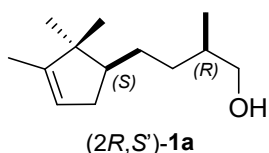

Yield 82% (482 mg) as a colourless oil; *tr*= 17.3 min, >99% purity by GC-MS; *dr*= 87:13 by <sup>13</sup>C-NMR; <sup>1</sup>H-NMR (CDCl<sub>3</sub>, 400 MHz):  $\delta$  5.22 (m, 1H), 3.51 (dd, *J* = 10.4 and 5.9 Hz, 1H), 3.43 (dd, *J* = 10.4 and 6.4 Hz, 1H), 2.27 (m, 1H), 1.82-1.63 (m, 1H + 2H), 1.60 (m, 3H), 1.53-1.38 (m, 2H), 1.28 (m, 1H), 1.16 (m, 1H), 0.97 (s, 3H), 0.92 (d, *J* = 6.8 Hz, 3H), 0.75 (s, 3H); <sup>13</sup>C{<sup>1</sup>H}-NMR (CDCl<sub>3</sub>, 101 MHz):  $\delta$  148.7, 121.7, 68.4, 50.5, 46.8, 36.1, 35.7, 32.2, 27.3, 25.9, 19.7, 16.5, 12.6; GC-MS: *m/z* (%): 196 (M<sup>+</sup>, 16), 181 (100), 107 (75), 95 (41); [ $\alpha$ ]<sub>D</sub> = +17.0 (CHCl<sub>3</sub>, *c* = 0.8)

**(S)-2-methyl-4-((R)-2,2,3-trimethylcyclopent-3-en-1-yl)pent-4-en-1-ol (2S,R'-1b)**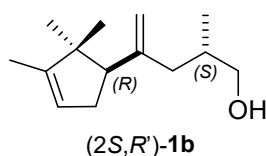

Yield 81% (505 mg) as a colourless oil;  $t_r$  = 18.5 min, 92% purity by GC-MS;  $d_r$  = 92:8 by  $^{13}\text{C}$ -NMR;  $^1\text{H-NMR}$  ( $\text{CDCl}_3$ , 400 MHz):  $\delta$  5.28 (m, 1H), 4.91 (m, 2H), 3.53 (dd,  $J$  = 10.5 and 5.6 Hz, 1H), 3.47 (dd,  $J$  = 10.5 and 5.9 Hz, 1H), 2.53 (m, 1H), 2.39-2.12 (m, 3H), 1.98-1.79 (m, 2H), 1.60 (m, 3H), 1.10 (s, 3H), 0.88 (d,  $J$  = 6.3 Hz, 3H), 0.76 (s, 3H);  $^{13}\text{C}\{^1\text{H}\}$ -NMR ( $\text{CDCl}_3$ , 101 MHz):  $\delta$  148.07, 147.55, 121.71, 112.28, 68.74, 55.30, 47.89, 41.53, 34.41, 34.35, 27.19, 21.15, 16.48, 12.96; GC-MS:  $m/z$  (%): 208 ( $M^+$ , 63), 135 (100), 107 (95), 91 (82);  $[\alpha]_D = -79.3$  ( $\text{CHCl}_3$ ,  $c$  = 1.1) vs litt.  $-73.1$  ( $\text{CCl}_4$ ,  $c$  = 0.6).<sup>17a</sup>

**(R)-2-methyl-4-((R)-2,2,3-trimethylcyclopent-3-en-1-yl)pent-4-en-1-ol (2R,R'-1b)**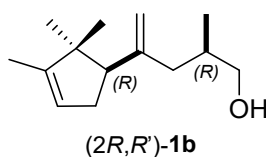

Yield 80% (500 mg) as a colourless oil;  $t_r$  = 18.4 min, 91% purity by GC-MS;  $d_r$  = 91:9 by  $^{13}\text{C}$ -NMR;  $^1\text{H-NMR}$  ( $\text{CDCl}_3$ , 400 MHz):  $\delta$  5.27 (m, 1H), 4.93 (m, 1H), 4.91 (m, 1H), 3.53 (dd,  $J$  = 10.7 and 5.4 Hz, 1H), 3.42 (dd,  $J$  = 10.7 and 5.9 Hz, 1H), 2.56 (m, 1H), 2.34 (m, 1H), 2.25-2.09 (m, 2H), 2.01-1.84 (m, 2H), 1.59 (m, 3H), 1.09 (s, 3H), 0.95 (d,  $J$  = 6.5 Hz, 3H), 0.75 (s, 3H);  $^{13}\text{C}\{^1\text{H}\}$ -NMR ( $\text{CDCl}_3$ , 101 MHz):  $\delta$  148.8, 147.5, 121.7, 112.1, 68.3, 55.7, 47.9, 42.0, 34.3, 34.3, 27.1, 21.1, 17.5, 12.9; GC-MS:  $m/z$  (%): 208 ( $M^+$ , 60), 135 (100), 107 (82), 91 (57);  $[\alpha]_D = -57.6$  ( $\text{CHCl}_3$ ,  $c$  = 1.1) vs litt.  $-60.8$  ( $\text{CCl}_4$ ,  $c$  = 0.9).<sup>17a</sup>

**(2R,3S)-3-methyl-5-((S)-2,2,3-trimethylcyclopent-3-en-1-yl)pentan-2-ol (2R,3S,S'-1c)**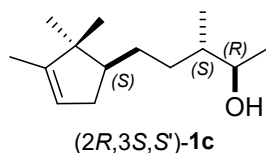

A sample of reaction mixture was analyzed by GC-MS before ADH reduction:  $t_r$  = 31.4 min ( $3S,S'$ ) and 31.6 min ( $3R,S'$ );  $d_r$  = 86:14. Yield 73% (460 mg) as a colourless oil;  $t_r$  = 18.1 min, 98% purity by GC-MS;  $d_r$  = 91:5:4 by  $^{13}\text{C}$ -NMR;  $^1\text{H-NMR}$  ( $\text{CDCl}_3$ , 400 MHz):  $\delta$  5.23 (m, 1H), 3.69 (quint,  $J$  = 6.3 Hz, 1H), 2.31 (m, 1H), 1.80 (m, 1H), 1.69 (m, 1H), 1.60 (m, 3H), 1.57-1.47 (m, 1H + 2H), 1.31 (m, 1H), 1.18 (m, 1H), 1.13 (d,  $J$  = 6.3 Hz, 3H), 1.05 (m, 1H), 0.98 (s, 3H), 0.90 (d,  $J$  = 6.7 Hz, 3H), 0.76 (s, 3H);  $^{13}\text{C}\{^1\text{H}\}$ -NMR ( $\text{CDCl}_3$ , 101 MHz):  $\delta$  148.9, 121.8, 71.7, 51.1, 46.9, 40.8, 36.0, 32.1, 27.9, 26.1, 19.8, 19.3, 14.8, 12.7; GC-MS:  $m/z$  (%): 210 ( $M^+$ , 17), 177 (78), 121 (72), 107 (100);  $[\alpha]_D = -4.4$  ( $\text{CHCl}_3$ ,  $c$  = 1.0).

**(2S,3S)-3-methyl-5-((S)-2,2,3-trimethylcyclopent-3-en-1-yl)pentan-2-ol (2S,3S,S'-1c)**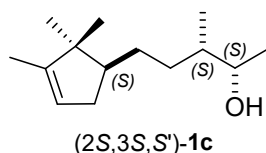

A sample of reaction mixture was analyzed by GC-MS before ADH reduction:  $t_r$  = 31.4 min ( $3S,S'$ ) and 31.6 min ( $3R,S'$ );  $d_r$  = 86:14. Yield 71% (447 mg) as a colourless oil;  $t_r$  = 18.1 min, 98% purity by GC-MS;  $d_r$  = 82:10:8 by  $^{13}\text{C}$ -NMR;  $^1\text{H-NMR}$  ( $\text{CDCl}_3$ , 400 MHz):  $\delta$  5.22 (m, 1H), 3.71 (qd,  $J$  = 6.3 and 4.2 Hz, 1H), 2.29 (m, 1H), 1.81 (m, 1H), 1.68 (m, 1H), 1.60 (m, 3H), 1.54-1.39 (m, 1H + 2H), 1.36-1.18 (m, 2H), 1.13 (d,  $J$  = 6.4 Hz, 3H), 1.05 (m, 1H), 0.98 (s, 3H), 0.90 (d,  $J$  = 6.7 Hz, 3H), 0.76 (s, 3H);  $^{13}\text{C}\{^1\text{H}\}$ -NMR ( $\text{CDCl}_3$ , 101 MHz):  $\delta$  148.6, 121.8, 71.1, 51.0, 46.8, 40.4, 35.9, 32.0, 27.9, 26.0, 20.3, 19.7, 14.4, 12.6; GC-MS:  $m/z$  (%): 210 ( $M^+$ , 15), 177 (70), 121 (70), 107 (100);  $[\alpha]_D = -3.0$  ( $\text{CHCl}_3$ ,  $c$  = 1.0).

**(2S,3R)-3-methyl-5-((S)-2,2,3-trimethylcyclopent-3-en-1-yl)pentan-2-ol (2S,3R,S'-1c)**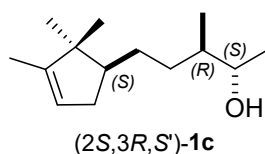

A sample of reaction mixture was analyzed by GC-MS before ADH reduction:  $t_r$  = 31.6 min (3R,S') and 31.4 min (3S,S');  $d_r$  = 86:14. Yield 72% (454 mg) as a colourless oil;  $t_r$  = 18.2 min, >99% purity by GC-MS;  $d_r$  = 91:9 by  $^{13}\text{C}$ -NMR;  $^1\text{H-NMR}$  ( $\text{CDCl}_3$ , 400 MHz):  $\delta$  5.23 (m, 1H), 3.67 (quint,  $J$  = 6.2 Hz, 1H), 2.29 (m, 1H), 1.82-1.68 (m, 2H), 1.60 (m, 3H), 1.56 (m, 1H), 1.48-1.25 (m, 1H + 2H + 2H), 1.14 (d,  $J$  = 6.3 Hz, 3H), 0.97 (s, 3H), 0.89 (d,  $J$  = 6.7 Hz, 3H), 0.76 (s, 3H);  $^{13}\text{C}\{^1\text{H}\}$ -NMR ( $\text{CDCl}_3$ , 101 MHz):  $\delta$  148.9, 121.9, 72.1, 50.6, 46.9, 40.5, 35.8, 31.5, 27.6, 26.0, 29.9, 19.7, 14.8, 12.8; GC-MS:  $m/z$  (%): 210 ( $\text{M}^+$ , 19), 177 (80), 121 (67), 107 (100);  $[\alpha]_D = +30.3$  ( $\text{CHCl}_3$ ,  $c$  = 0.9).

**(2R,3R)-3-methyl-5-((S)-2,2,3-trimethylcyclopent-3-en-1-yl)pentan-2-ol (2R,3R,S'-1c)**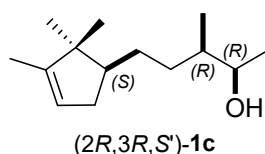

A sample of reaction mixture was analyzed by GC-MS before ADH reduction:  $t_r$  = 31.6 min (3R,S') and 31.4 min (3S,S');  $d_r$  = 86:14. Yield 70% (441 mg) as a colourless oil;  $t_r$  = 18.2 min, >99% purity by GC-MS;  $d_r$  = 87:13 by  $^{13}\text{C}$ -NMR;  $^1\text{H-NMR}$  ( $\text{CDCl}_3$ , 400 MHz):  $\delta$  5.23 (m, 1H), 3.71 (bm, 1H), 2.29 (m, 1H), 1.79 (m, 1H), 1.69 (m, 1H), 1.60 (m, 3H), 1.58 (s, 1H), 1.52-1.22 (m, 1H + 2H + 2H), 1.16 (d,  $J$  = 6.4 Hz, 3H), 0.97 (s, 3H), 0.90 (d,  $J$  = 6.7 Hz, 3H), 0.76 (s, 3H);  $^{13}\text{C}\{^1\text{H}\}$ -NMR ( $\text{CDCl}_3$ , 101 MHz):  $\delta$  148.9, 121.8, 71.8, 50.6, 46.9, 40.2, 35.8, 31.8, 27.7, 26.0, 20.5, 19.9, 14.3, 12.8; GC-MS:  $m/z$  (%): 210 ( $\text{M}^+$ , 17), 177 (78), 121 (72), 107 (100);  $[\alpha]_D = +27.0$  ( $\text{CHCl}_3$ ,  $c$  = 1.1).

**(2S,3R,Z)-3-methyl-5-((S)-2,2,3-trimethylcyclopent-3-en-1-yl)pent-4-en-2-ol (Z,2S,3R,S'-1d)**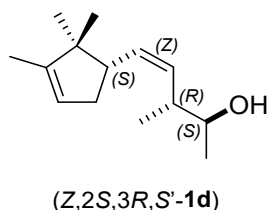

Yield 49% (306 mg) as a colourless oil;  $t_r$  = 16.8 min, 96% purity by GC-MS;  $Z$  >99% by  $^{13}\text{C}$ -NMR,  $d_r$  = 96:4 by  $^{13}\text{C}$ -NMR;  $^1\text{H-NMR}$  ( $\text{CDCl}_3$ , 400 MHz):  $\delta$  5.61 (dd,  $J$  = 10.8 and 1.0 Hz, 1H), 5.33 (ddd,  $J$  = 10.8, 9.8 and 0.9 Hz, 1H), 5.22 (m, 1H), 3.56 (quint,  $J$  = 6.3 Hz, 1H), 2.77 (dt,  $J$  = 10.5 and 8.5 Hz, 1H), 2.48 (m, 1H), 2.24 (dddd,  $J$  = 15.7, 7.9, 3.2 and 1.6 Hz, 1H), 2.00 (m, 1H), 1.63 (bs, 1H), 1.60 (m, 3H), 1.18 (d,  $J$  = 6.2 Hz, 3H), 0.98 (s, 3H), 0.94 (d,  $J$  = 6.9 Hz, 3H), 0.83 (s, 3H);  $^{13}\text{C}\{^1\text{H}\}$ -NMR ( $\text{CDCl}_3$ , 101 MHz):  $\delta$  148.4, 133.4, 132.5, 121.6, 71.7, 48.7, 48.3, 40.1, 36.8, 26.1, 20.7, 20.3, 17.7, 12.8; GC-MS:  $m/z$  (%): 208 ( $\text{M}^+$ , 17), 149 (83), 121 (100), 107 (83);  $[\alpha]_D = +106.0$  ( $\text{CHCl}_3$ ,  $c$  = 0.8).



### General procedure for bioreduction with OYE2 at preparative scale

According to Scheme 4 of the article, the same procedure used for the synthesis of **8** was adapted for the reduction of **5c** (634 mg) and **5d** (79 mg). The crude material was submitted to silica gel column chromatography purification affording **7c** and **7d**.

#### (*R*)-3-methyl-5-((*S*)-2,2,3-trimethylcyclopent-3-en-1-yl)pentan-2-one (**3*R,S'***-**7c**)

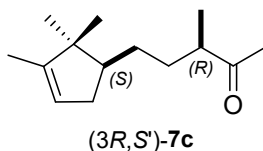

Yield 89% (570 mg) as a pale-yellow oil;  $t_r = 31.6$  min (**3*R,S'***) and 31.4 min (**3*S,S'***),  $dr = 86:14$ , 97% purity by GC-MS; **<sup>1</sup>H-NMR** ( $\text{CDCl}_3$ , 400 MHz):  $\delta$  5.16 (m, 1H), 2.47 (m, 1H), 2.24 (m, 1H), 2.09 (s, 3H), 1.79-1.56 (m, 1H+2H), 1.60 (m, 3H), 1.41-1.28 (m, 2H), 1.18 (m, 1H), 1.04 (d,  $J = 7.0$  Hz, 3H), 0.91 (s, 3H), 0.69 (s, 3H); **<sup>13</sup>C{<sup>1</sup>H}-NMR** ( $\text{CDCl}_3$ , 101 MHz):  $\delta$  212.7, 148.7, 121.6, 50.4, 47.5, 46.8, 35.6, 32.0, 28.0, 27.5, 25.9, 19.7, 16.1, 12.6; GC-MS:  $m/z$  (%): 208 ( $M^+$ , 10), 121 (100), 109 (42), 93 (23);  $[\alpha]_D = -3.3$  ( $\text{CHCl}_3$ ,  $c = 1.1$ ).

#### (*R,Z*)-3-methyl-5-((*S*)-2,2,3-trimethylcyclopent-3-en-1-yl)pent-4-en-2-one (**Z,3*R,S'***-**7d**)

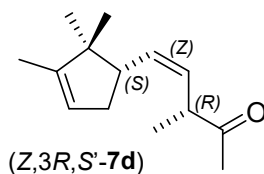

Yield 81% (65 mg) as a pale-yellow oil;  $t_r = 16.5$  min, 88% purity by GC-MS;  $Z > 99\%$  by <sup>13</sup>C-NMR,  $dr = 96:4$  by <sup>13</sup>C-NMR; **<sup>1</sup>H-NMR** ( $\text{CDCl}_3$ , 400 MHz):  $\delta$  5.60 (dd,  $J = 10.8$  and 1.0 Hz, 1H), 5.40 (ddd,  $J = 10.8$ , 9.8 and 0.9 Hz, 1H), 5.22 (m, 1H), 3.48 (dq,  $J = 10.0$  and 6.9 Hz, 1H), 2.76 (dt,  $J = 10.8$  and 8.5 Hz, 1H), 2.23 (dddt,  $J = 15.7$ , 7.8, 3.2 and 1.6 Hz, 1H), 2.13 (s, 3H), 2.00 (m, 1H), 1.60 (m, 3H), 1.11 (d,  $J = 6.9$  Hz, 3H), 0.96 (s, 3H), 0.82 (s, 3H); **<sup>13</sup>C{<sup>1</sup>H}-NMR** ( $\text{CDCl}_3$ , 101 MHz):  $\delta$  210.3, 148.2, 133.5, 129.5, 121.6, 48.7, 48.6, 46.4, 36.5, 28.1, 26.2, 20.6, 17.6, 12.7; GC-MS:  $m/z$  (%): 206 ( $M^+$ , 33), 134 (67), 107 (100), 93 (72);  $[\alpha]_D = -116.8$  ( $\text{CHCl}_3$ ,  $c = 1.1$ ).

## Characterization of commercial sandalwood fragrances

## 1a, Brahmanol®

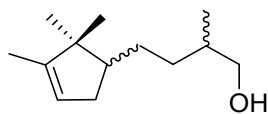

1a, Brahmanol®

tr= 17.3 min by GC-MS; *dr*= 54:46 by  $^{13}\text{C}$ -NMR;  $^1\text{H}$ -NMR ( $\text{CDCl}_3$ , 400 MHz):  $\delta$  5.26-5.18 (m, 1H), 3.55-3.49 (m, 1H), 3.45-3.40 (m, 1H), 2.32-2.25 (m, 1H), 1.82-1.74 (m, 1H), 1.73-1.61 (m, 2H), 1.60-1.59 (m, 3H), 1.51-1.42 (m, 2H), 1.23-1.14 (m, 1H), 1.09-1.05 (m, 1H), 0.98-0.96 (m, 3H), 0.95-0.91 (m, 3H), 0.78-0.73 (m, 3H);  $^{13}\text{C}\{^1\text{H}\}$ -NMR ( $\text{CDCl}_3$ , 101 MHz):  $\delta$  148.9, 121.84, 121.82, 68.7, 68.4, 51.0, 50.7, 46.93, 46.91, 36.4, 36.2, 35.9, 35.8, 32.6, 32.3, 27.6, 27.4, 26.1, 26.0, 19.9, 19.8, 17.0, 16.2, 12.7; GC-MS: *m/z* (%): 196 ( $\text{M}^+$ , 16), 181 (100), 107 (75), 95 (46);  $[\alpha]_{\text{D}} = +8.9$  ( $\text{CHCl}_3$ , *c* = 1.6).

## 1b, Firsantol®

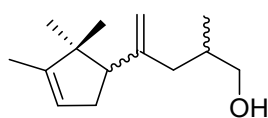

1b, Firsantol®

tr= 18.4 min ( $2SR,S'R'$ ) and 18.5 min ( $2RS,S'R'$ ) by GC-MS; *dr*= 42:58 by GC-MS and  $^{13}\text{C}$ -NMR;  $^1\text{H}$ -NMR ( $\text{CDCl}_3$ , 400 MHz):  $\delta$  5.26-5.25 (m, 1H), 4.93-4.88 (m, 2H), 3.55-3.48 (m, 1H), 3.47-3.37 (m, 1H), 2.60-2.49 (m, 1H), 2.41-2.29 (m, 1H), 2.28-2.09 (m, 2H), 1.91-1.78 (m, 2H), 1.61-1.56 (m, 3H), 1.11-1.06 (m, 3H), 0.97-0.84 (m, 3H), 0.77-0.71 (m, 3H);  $^{13}\text{C}\{^1\text{H}\}$ -NMR ( $\text{CDCl}_3$ , 101 MHz):  $\delta$  148.7, 148.0, 147.5, 147.4, 121.7, 112.2, 112.0, 68.6, 68.2, 57.8, 55.2, 47.9, 47.8, 42.0, 41.5, 34.4, 34.32, 34.27, 34.2, 27.1, 27.0, 21.10, 21.06, 17.4, 16.4, 12.9; GC-MS ( $2SR,S'R'$ ): *m/z* (%): 208 ( $\text{M}^+$ , 71), 135 (100), 107 (83), 91 (64); GC-MS ( $2RS,S'R'$ ): *m/z* (%): 208 ( $\text{M}^+$ , 78), 135 (100), 107 (90), 91 (73);  $[\alpha]_{\text{D}} = -57.4$  ( $\text{CHCl}_3$ , *c* = 1.2).

## 1c, Sandalore®

1c/regioisomer/dihydro-Santalore® = 84:13.4:2.6

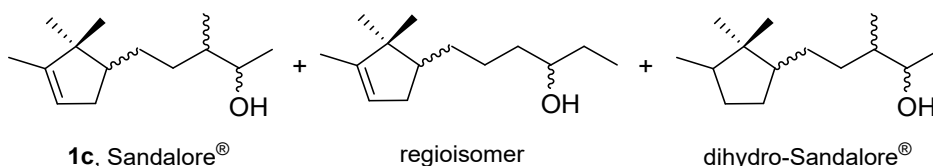

1c, Sandalore®

regioisomer

dihydro-Santalore®

tr= 18.16-18.26 min (1c, Sandalore®), tr= 18.8 min (regioisomer) and tr= 18.6 (dihydro-Santalore®), 84:13.4:2.6 by GC-MS; *dr*= 31:31:20:18 by  $^{13}\text{C}$ -NMR;  $^1\text{H}$ -NMR ( $\text{CDCl}_3$ , 400 MHz):  $\delta$  5.24-5.18 (m, 1H), 3.81-3.58 (m, 1H), 3.56-3.46 (m, regioisomer, 0.15H) 2.33-2.21 (m, 1H), 1.86-1.61 (m, 2H), 1.61-1.56 (m, 3H), 1.56-1.29 (m, 5H), 1.16-1.09 (m, 3H), 1.52-1.22 (m, 2H), 1.16-1.09 (m, 3H), 0.97-0.94 (m, 3H), 0.93-0.85 (m, 3H), 0.75-0.72 (m, 3H);  $^{13}\text{C}\{^1\text{H}\}$ -NMR ( $\text{CDCl}_3$ , 101 MHz):  $\delta$  148.83, 148.81, 121.85, 121.83, 121.80, 73.43, 73.36, 71.97, 71.67, 71.62, 71.24, 51.04, 50.57, 50.52, 46.90, 46.87, 40.75, 40.45, 40.39, 40.18, 37.44, 35.98, 35.95, 35.81, 35.77, 35.73, 32.09, 32.06, 31.71, 31.52, 30.33, 30.26, 30.15, 27.95, 27.90, 27.64, 27.56, 26.06, 26.04, 25.98, 25.04, 24.93, 20.45, 20.40, 19.84, 19.80, 19.61, 19.27, 14.77, 14.71, 14.41, 14.29, 12.70; GC-MS: *m/z* (%): 210 ( $\text{M}^+$ , 20), 177 (83), 121 (67), 107 (100); GC-MS: *m/z* (%): 210 ( $\text{M}^+$ , 5), 177 (100), 121 (81), 107 (88);  $[\alpha]_{\text{D}} = -1.2$  ( $\text{CHCl}_3$ , *c* = 1.0).

**1d, Ebanol®** $E/Z = 90:10$ 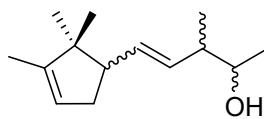**1d, Ebanol®**

tr= 16.9 min and 17.2 min (*E*); 16.7 min and 16.8 min (*Z*),  $E/Z = 92:8$  by GC-MS;  $E/Z = 90:10$  by  $^{13}\text{C-NMR}$ ,  $dr = 25:25:25:25$  by  $^{13}\text{C-NMR}$ ;  $^1\text{H-NMR}$  ( $\text{CDCl}_3$ , 400 MHz):  $\delta$  5.65-5.45 (m, 1H), 5.41-5.24 (m, 1H), 5.24-5.19 (m, 1H), 3.69-3.39 (m, 1H), 2.43-2.30 (m, 1H), 2.29-2.00 (m, 3H), 1.87-1.62 (m, 1H), 1.62-1.53 (m, 3H), 1.18-1.10 (m, 3H), 1.04-0.97 (m, 3H), 0.96-0.92 (m, 3H), 0.77-0.71 (m, 3H);  $^{13}\text{C}\{^1\text{H}\}\text{-NMR}$  ( $\text{CDCl}_3$ , 101 MHz):  $\delta$  148.10, 148.05, 133.86, 132.82, 132.77, 132.72, 132.57, 121.60, 121.57, 121.55, 71.34, 71.31, 71.12, 71.08, 54.42, 54.37, 54.26, 54.14, 48.16, 48.08, 48.05, 45.41, 45.39, 45.34, 44.39, 44.15, 35.60, 35.54, 35.50, 35.48, 25.60, 25.56, 25.50, 25.46, 20.69, 20.64, 20.60, 20.58, 20.31, 20.20, 20.10, 20.07, 16.03, 12.79; GC-MS (*E*):  $m/z$  (%): 208 ( $\text{M}^+$ , 1), 164 (64), 149 (100), 121 (100); GC-MS (*Z*):  $m/z$  (%): 208 ( $\text{M}^+$ , 12), 149 (75), 121 (100), 107 (88);  $[\alpha]_{\text{D}} = +1.1$  ( $\text{CHCl}_3$ ,  $c = 1.0$ ).

Stacked  $^{13}\text{C}$ -NMR spectra of sandalwood fragrances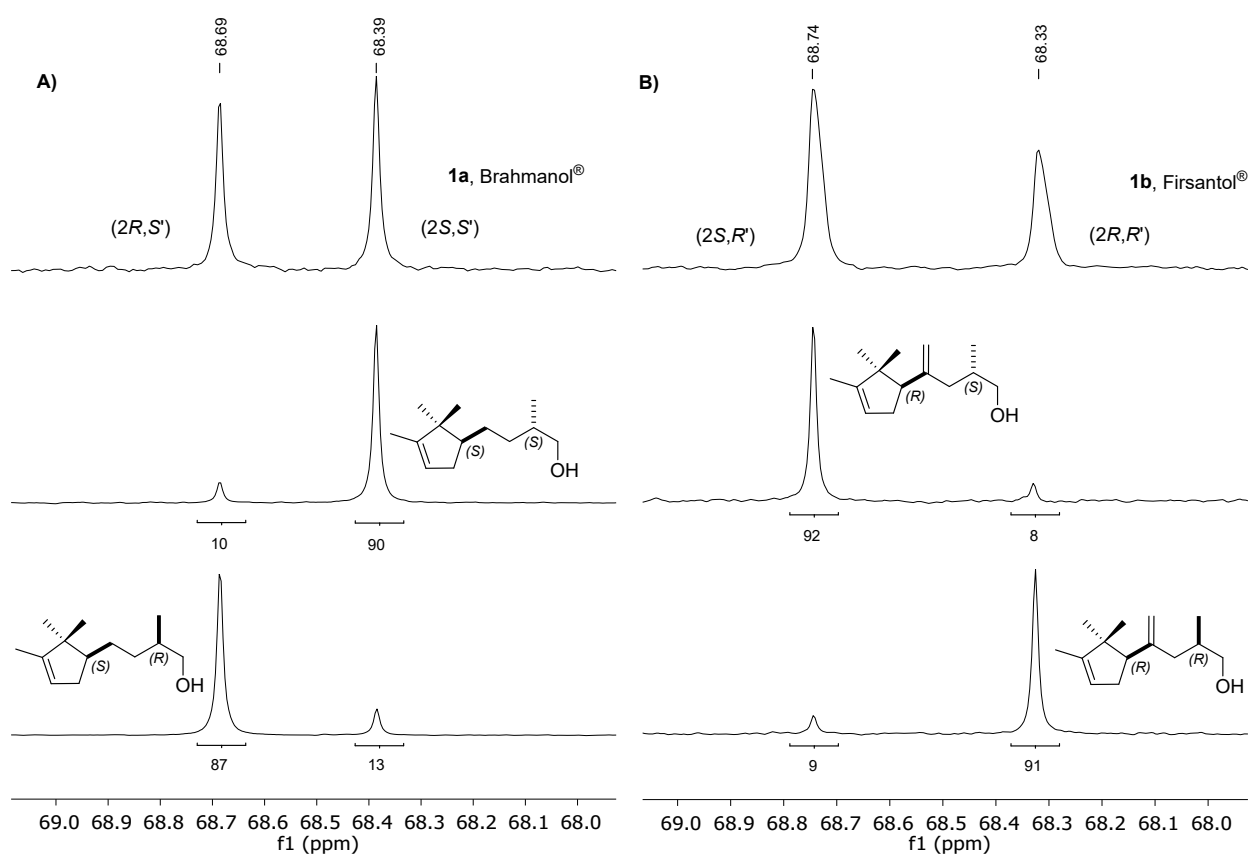

**Figure S2**  $^{13}\text{C}$  NMR spectra ( $\text{CDCl}_3$ , 100 MHz, 302 K), C1 signal expanded regions: **A)** Brahmanol<sup>®</sup> isomers; **B)** Firsantol<sup>®</sup> isomers.

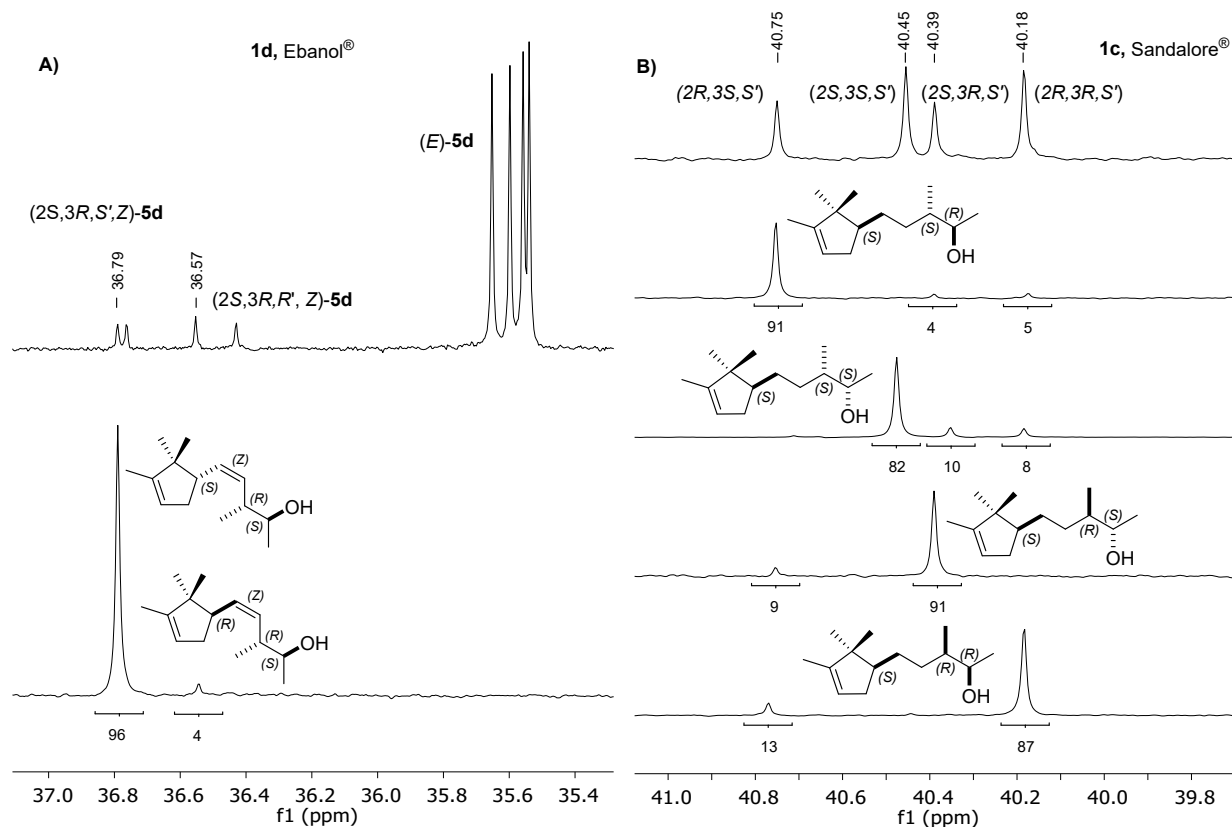

**Figure S3**  $^{13}\text{C}$  NMR spectra ( $\text{CDCl}_3$ , 100 MHz, 302 K) expanded regions: **A)** C(3)-Me signal for Ebanol<sup>®</sup> isomers; **B)** C(3) signal for Sandalore<sup>®</sup> isomers.

### General procure for the preparation of the Mosher's esters of **1c**

To a freshly prepared and an ice-cold solution of  $\alpha$ -methoxy- $\alpha$ -(trifluoromethyl)phenylacetic acid chloride (0.2 mmol) in dry  $\text{CH}_2\text{Cl}_2$  was added a solution of alcohol **1c** (21 mg) in  $\text{CH}_2\text{Cl}_2$  (0.2 mL) in the presence of DMAP (10 mg) under a  $\text{N}_2$  atmosphere. After 12 h a room temperature, the reaction mixture was quenched with few drops of water and the solvent was removed under reduced pressure. The crude material was submitted to column chromatographic purification with *n*-hexane/EtOAc (95:5), affording the corresponding MTPA ester. The acid chloride was prepared by reaction of  $\alpha$ -methoxy- $\alpha$ -(trifluoromethyl)phenylacetic acid (0.2 mmol) with oxalyl chloride (2.0 mmol) and a catalytic amount of DMF (5  $\mu\text{L}$ ) in *n*-hexane (2 mL) at room temperature. After 1 day, the solvent was removed under reduced pressure affording the acid chloride of a sufficient purity to be used without further purifications.<sup>27</sup>

The MTPA-esters were prepared from the couple of alcohols **1c** obtained from the reduction of **4c** with OYE2 and Evo440 or Evo270:

#### (*R*)-MTPA-Evo440

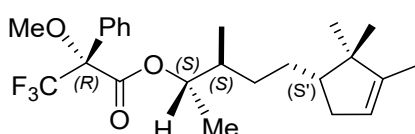

Yield 82% (35 mg) as a pale-yellow oil;  $^1\text{H-NMR}$  ( $\text{CDCl}_3$ , 400 MHz):  $\delta$  7.58-7.51 (m, 1H+1H), 7.43-7.36 (m, 1H+1H+1H), 5.21 (m, 1H), 5.15 (qd,  $J = 6.5$  and 4.0 Hz, 1H), 3.57 (m, 3H), 2.20 (dddt,  $J = 14.8$ , 7.3, 2.9 and 1.6 Hz, 1H), 1.74-1.61 (m, 2H), 1.60 (m, 3H), 1.56 (m, 1H), 1.48-1.34 (m, 1H+1H), 1.31 (d,  $J = 6.4$  Hz, 3H), 1.18-0.98 (m, 2H), 0.95 (s, 3H), 0.89 (d,  $J = 6.8$  Hz, 3H), 0.73 (s, 3H);  $^{13}\text{C}\{^1\text{H}\}\text{-NMR}$  ( $\text{CDCl}_3$ , 101 MHz):  $\delta$  166.2, 148.8, 132.8, 129.6, 128.5, 127.43, 127.41, 125.1, 122.2, 121.8, 76.9, 55.5, 50.9, 50.5, 46.9, 38.4, 35.8, 31.9, 27.3, 26.0, 19.8, 17.0, 14.7, 12.7;  $^{19}\text{F}\{^1\text{H}\}\text{-NMR}$  ( $\text{CDCl}_3$ , 377 MHz):  $\delta$  -71.19;  $[\alpha]_{\text{D}} = +37.7$  ( $\text{CHCl}_3$ ,  $c = 0.7$ ).

#### (*R*)-MTPA-Evo270

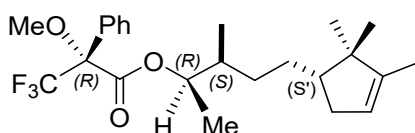

Yield 92% (39 mg) as a pale-yellow oil;  $^1\text{H-NMR}$  ( $\text{CDCl}_3$ , 400 MHz):  $\delta$  7.58-7.51 (m, 1H+1H), 7.43-7.36 (m, 1H+1H+1H), 5.22 (m, 1H), 5.10 (quint,  $J = 6.3$  Hz, 1H), 3.54 (m, 3H), 2.25 (dddt,  $J = 15.0$ , 7.4, 3.0 and 1.4 Hz, 1H), 1.84-1.71 (m, 2H), 1.67 (m, 1H), 1.60 (m, 3H), 1.56-1.42 (m, 1H+1H), 1.20 (d,  $J = 6.4$  Hz, 3H), 1.17-1.00 (m, 2H), 0.97 (s, 3H), 0.93 (d,  $J = 6.8$  Hz, 3H), 0.76 (s, 3H);  $^{13}\text{C}\{^1\text{H}\}\text{-NMR}$  ( $\text{CDCl}_3$ , 101 MHz):  $\delta$  166.3, 148.9, 132.6, 129.6, 128.5, 127.6, 125.0, 122.1, 121.7, 77.5, 55.44, 55.43, 50.9, 50.5, 46.9, 37.9, 35.9, 32.0, 27.6, 26.0, 19.8, 15.4, 14.9, 12.7;  $^{19}\text{F}\{^1\text{H}\}\text{-NMR}$  ( $\text{CDCl}_3$ , 377 MHz):  $\delta$  -71.28;  $[\alpha]_{\text{D}} = +19.5$  ( $\text{CHCl}_3$ ,  $c = 0.7$ ).

#### (*S*)-MTPA-Evo440

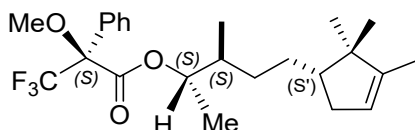

Yield 92% (39 mg) as a pale-yellow oil;  $^1\text{H-NMR}$  ( $\text{CDCl}_3$ , 400 MHz):  $\delta$  7.58-7.50 (m, 1H+1H), 7.43-7.36 (m, 1H+1H+1H), 5.22 (m, 1H), 5.11 (qd,  $J = 6.4$  and 4.1 Hz, 1H), 3.53 (m, 3H), 2.20 (dddt,  $J = 14.8$ , 7.2, 2.9 and 1.5 Hz, 1H), 1.75 (m, 1H), 1.70-1.62 (m, 2H), 1.60 (m, 3H), 1.55 (m, 1H), 1.48 (m, 1H), 1.25 (d,  $J = 6.4$  Hz, 3H), 1.20-1.04 (m, 2H), 0.97 (s, 3H), 0.94 (d,  $J = 6.9$  Hz, 3H), 0.75 (s, 3H);  $^{13}\text{C}\{^1\text{H}\}\text{-NMR}$  ( $\text{CDCl}_3$ , 101 MHz):  $\delta$  166.4, 148.9, 132.6, 129.6, 128.5, 127.69, 127.68, 125.0, 122.2, 121.8, 77.1, 55.4, 51.0, 50.5, 46.9, 38.4, 35.9, 32.1, 27.8, 26.0, 19.8, 16.7, 14.8, 12.7;  $^{19}\text{F}\{^1\text{H}\}\text{-NMR}$  ( $\text{CDCl}_3$ , 377 MHz):  $\delta$  -71.23;  $[\alpha]_{\text{D}} = -17.0$  ( $\text{CHCl}_3$ ,  $c = 0.7$ ).

**(S)-MTPA-Evo270**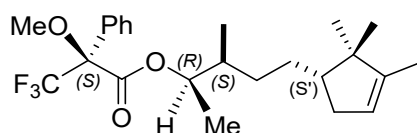

Yield 89% (38 mg) as a pale-yellow oil;  $^1\text{H-NMR}$  ( $\text{CDCl}_3$ , 400 MHz):  $\delta$  7.58-7.51 (m, 1H+1H), 7.43-7.36 (m, 1H+1H+1H), 5.21 (m, 1H), 5.10 (quint,  $J = 6.2$  Hz, 1H), 3.57 (q,  $J = 1.2$  Hz, 3H), 2.20 (dddt,  $J = 14.9, 7.3, 2.9$  and  $1.5$  Hz, 1H), 1.78-1.68 (m, 2H), 1.64 (m, 1H), 1.60 (m, 3H), 1.56 (s, 1H), 1.28 (d,  $J = 6.4$  Hz, 3H), 1.26 (m, 1H), 1.18-1.01 (m, 2H), 0.96 (s, 3H), 0.85 (d,  $J = 6.9$  Hz, 3H), 0.74 (s, 3H);  $^{13}\text{C}\{^1\text{H}\}$ -NMR ( $\text{CDCl}_3$ , 101 MHz):  $\delta$  166.2, 148.9, 132.8, 129.6, 128.5, 127.44, 127.42, 125.0, 122.2, 121.8, 77.4, 55.59, 55.48, 50.9, 46.9, 37.8, 35.9, 31.7, 27.5, 26.0, 19.8, 15.8, 14.7, 12.7;  $^{19}\text{F}\{^1\text{H}\}$ -NMR ( $\text{CDCl}_3$ , 377 MHz):  $\delta$  -71.25;  $[\alpha]_D = -36.9$  ( $\text{CHCl}_3$ ,  $c = 0.7$ ).

### Assignment of absolute stereochemical configuration of C(2) stereogenic center of Sandalore® alcohols through analysis of NMR chemical shift of Mosher's esters

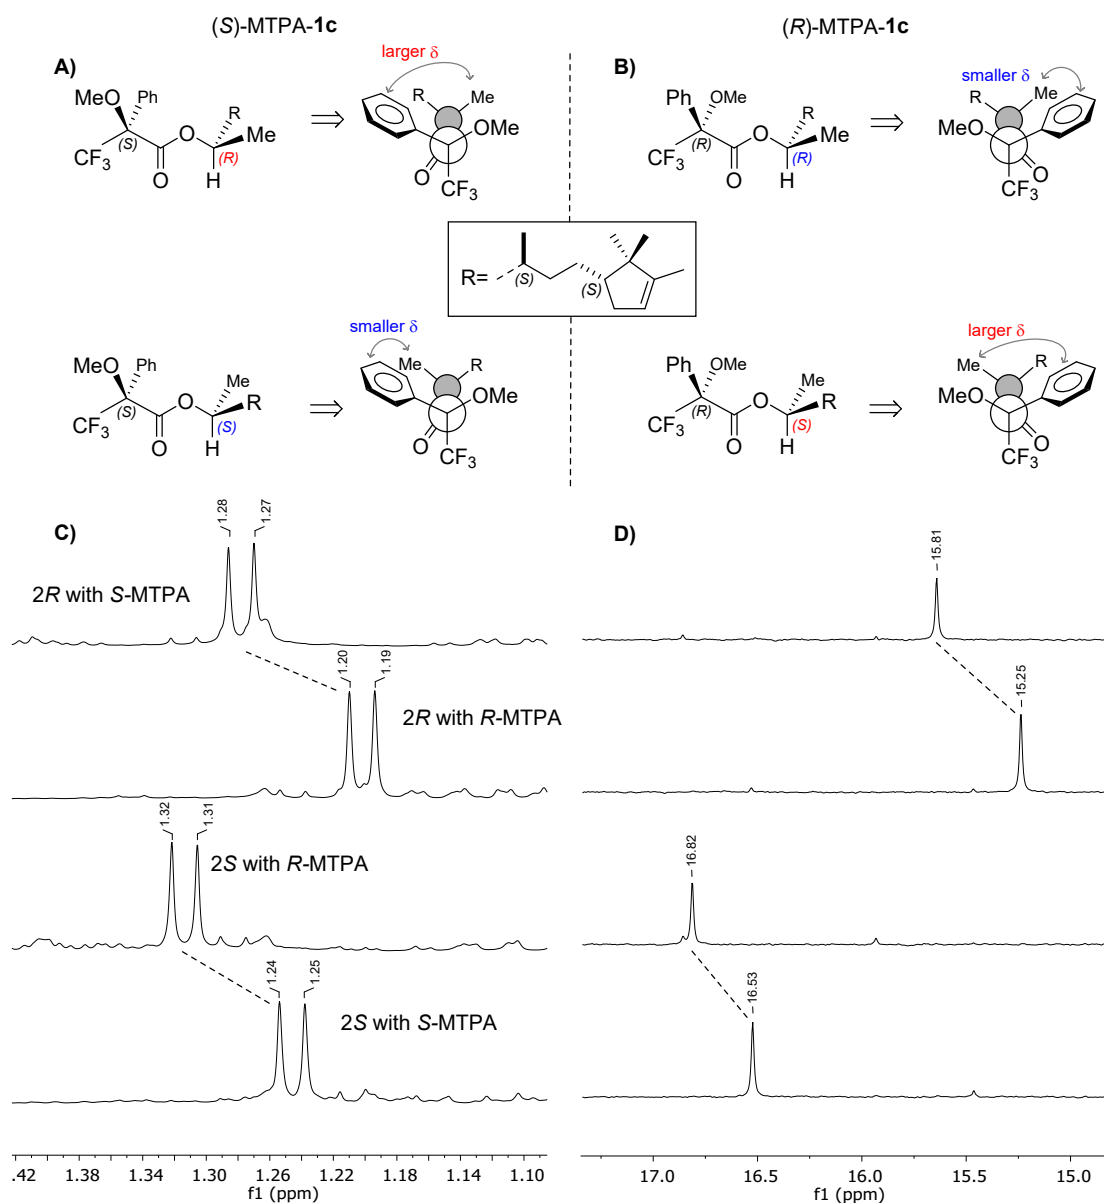

**Figure S4 A)** Preferred conformers of (*S*)-MTPA esters of **1c**: the conformations are elucidated based on Mosher's model ( $\text{CF}_3$  group eclipsed to CO carbonyl). The analyzed alcohols **1c** were obtained from the reduction of the  $\alpha,\beta$ -unsaturated ketone **4c** using OYE2 coupled with a *pro* (*R*) (Evo270) or a *pro* (*S*) (Evo440) ADH. **B)** Preferred conformers of (*R*)-MTPA derivatives obtained from the same couple of alcohols. **C)** Expanded  $^1\text{H}$ -NMR (400 MHz) region relative to C(1) methyl signal of Mosher's esters ( $\text{CDCl}_3$  at 302 K). When the methyl group lies closer to the shielding region of phenyl ring, its chemical shift is up-field, conversely if it is distanced from the aromatic ring its protons are less deshielded, resulting in a downfield chemical shift. **D)** A trend similar to that of C) is observed for the C(1) signal of the  $^{13}\text{C}$ -NMR spectrum (100 MHz,  $\text{CDCl}_3$  at 302 K), but for the  $^{13}\text{C}$  the differential chemical shifts ( $\Delta\delta^{S,R}$ ) are more pronounced than those observed for  $^1\text{H}$  (0.07 ppm vs  $0.3\div 0.5$  ppm). The signals were assigned by means of  $^{13}\text{C}$  pendant experiments combined with HMBC-( $^1\text{H}$ - $^{13}\text{C}$ )-NMR (see pag. S81, S83, S85, S87).

## Assignment of absolute stereochemical configuration of C(2) stereogenic center of ketone **7d** through 2D NOESY experiment and DFT computation

### NOESY experiment

The NMR sample was prepared in a 5 mm tubes with 0.5 ml CDCl<sub>3</sub> and ~14 mg of **7d**, without degassing. NMR data were collected on a 400 MHz spectrometer (Bruker Avance II). Acquisition parameters of 2D-NOESY spectra: TD: F2=1 k, F1=256 experiments; d8= 400/600/800/1000 ms mixing time; d1= 4 s relaxation delay; ns= 2 scans. NOESY sequence is based on *noesygpshz* pulse program of Bruker Top-spin experiment library software (phase sensitive; with gradient/rf spoil pulse in mixing time).<sup>28</sup> NOE build-up curve was obtained with mixing times up to 800 ms. The integration values are referenced to H4-H5 contact, which distance is estimated 2.33 Å. According to the following equation,  $r_{H6-Me} = 3.07$  Å.

$$r_{H6-Me} = r_{H4-H5} \left( \frac{I_{H4-H5}}{I_{H6-Me}} \right)^{1/6}$$

### DFT calculations

Density functional theory (DFT) calculations were performed with Gaussian 16.6 software.<sup>29</sup> Molecular geometry optimizations were performed using the B3LYP functional,<sup>30</sup> augmented with Grimme's D3 empirical dispersion term,<sup>31</sup> using the 6-31+G(d,p) basis set in *vacuum*.<sup>32</sup> Single point frequency calculations were performed with the Truhlar's implicit solvent model, SCRF=SMD (solvent= CHCl<sub>3</sub>, 298.15 K).<sup>33</sup> 3D rendering of optimized structures was generated using CYLview software.<sup>34</sup>

**Table S6** Energies and geometric parameters of conformers.

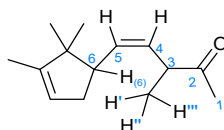

| Comp.        | Conf. | H<br>(au)   | G<br>(au)   | $\Delta G^a$<br>(kcal mol <sup>-1</sup> ) | Pop. <sup>b</sup><br>(%) | Dihedral angle<br>C4-C3-C(Me)-H'<br>(°) | Avg Dist. <sup>c</sup><br>H6-(CHCH <sub>3</sub> )<br>(Å) | WAvG Dist. <sup>d</sup><br>(Å) |
|--------------|-------|-------------|-------------|-------------------------------------------|--------------------------|-----------------------------------------|----------------------------------------------------------|--------------------------------|
| (Z,3R,S')-7d | Conf1 | -621.707749 | -621.769502 | 0.39                                      | 66                       | -13.22                                  | 3.97                                                     | 3.70                           |
|              | Conf2 | -621.705232 | -621.768883 |                                           | 34                       | 167.27                                  | 3.20                                                     |                                |
| (Z,3S,S')-7d | Conf1 | -621.705800 | -621.769803 | 5.88                                      | >99                      | -37.86                                  | 4.63                                                     | 4.63                           |
|              | Conf2 | -621.699848 | -621.760434 |                                           | -                        | 125.81                                  | 2.70                                                     |                                |

a) Gibbs energy difference between the most stable and less stable conformer. b) Population is calculated as Boltzman distribution at 298.15 K. c) Average distance between H6 and the three protons of CH<sub>3</sub> (H', H'', and H'''). d) Weighted average distance.



## Coordinates

**Conf1 of (Z,3R,S')-7d**

Energy (RB3LYP)= -622.053184 Hartree

|   |          |          |          |
|---|----------|----------|----------|
| C | -0.80508 | 0.71593  | 0.10392  |
| C | -1.74974 | 1.94563  | 0.12081  |
| C | -3.02304 | 1.38747  | -0.46024 |
| C | -3.04254 | 0.05064  | -0.45915 |
| C | -1.77001 | -0.52216 | 0.16831  |
| H | -1.33247 | 2.78400  | -0.44806 |
| H | -1.90887 | 2.31671  | 1.14471  |
| H | -3.84113 | 2.01474  | -0.80288 |
| H | -0.34914 | 0.68746  | -0.89124 |
| C | -1.18932 | -1.70943 | -0.60844 |
| H | -0.23096 | -2.01319 | -0.17665 |
| H | -1.85668 | -2.57679 | -0.57396 |
| H | -1.02374 | -1.45125 | -1.65993 |
| C | -2.06962 | -0.95826 | 1.61655  |
| H | -2.83449 | -1.74108 | 1.63209  |
| H | -1.17276 | -1.35934 | 2.09942  |
| H | -2.43825 | -0.12096 | 2.21685  |
| C | -4.16025 | -0.82970 | -0.92554 |
| H | -5.01346 | -0.23934 | -1.26987 |
| H | -3.84135 | -1.47806 | -1.75058 |
| H | -4.50929 | -1.49282 | -0.12422 |
| C | 0.26697  | 0.76643  | 1.14800  |
| H | -0.08602 | 0.92153  | 2.16689  |
| C | 1.59038  | 0.68411  | 0.96786  |
| H | 2.23491  | 0.78672  | 1.84115  |
| C | 2.33399  | 0.51941  | -0.33932 |
| H | 1.61856  | 0.23863  | -1.12197 |
| C | 3.32647  | -0.64642 | -0.21183 |
| O | 4.52878  | -0.46717 | -0.24338 |
| C | 2.73053  | -2.02871 | -0.03066 |
| H | 2.07935  | -2.04682 | 0.84884  |
| H | 2.10607  | -2.28554 | -0.89377 |
| H | 3.52793  | -2.7644  | 0.07788  |
| C | 3.05134  | 1.81536  | -0.73577 |
| H | 2.32390  | 2.61909  | -0.87595 |
| H | 3.75838  | 2.11618  | 0.04133  |
| H | 3.61888  | 1.67999  | 1.66009  |

**Conf2 of (Z,3R,S')-7d**

Energy= -622.051871 Hartree

|   |          |          |          |
|---|----------|----------|----------|
| C | 0.36045  | 0.14532  | -0.37843 |
| C | 0.70136  | 1.62610  | -0.69440 |
| C | 2.01015  | 1.81772  | 0.02647  |
| C | 2.58129  | 0.65813  | 0.36717  |
| C | 1.75224  | -0.53365 | -0.11784 |
| H | -0.09202 | 2.29866  | -0.34984 |
| H | 0.81008  | 1.79715  | -1.77636 |
| H | 2.44311  | 2.79608  | 0.21489  |
| H | -0.15440 | 0.14918  | 0.58432  |
| C | 1.62876  | -1.65374 | 0.92216  |
| H | 0.93368  | -2.42355 | 0.57115  |
| H | 2.59383  | -2.13711 | 1.10726  |
| H | 1.25433  | -1.26718 | 1.87564  |
| C | 2.39282  | -1.09885 | -1.40167 |
| H | 3.41921  | -1.42445 | -1.20531 |
| H | 1.83753  | -1.96586 | -1.77364 |
| H | 2.43002  | -0.34575 | -2.19496 |
| C | 3.89204  | 0.47712  | 1.06767  |
| H | 4.37315  | 1.43892  | 1.26417  |
| H | 3.76368  | -0.03983 | 2.02625  |
| H | 4.58458  | -0.13254 | 0.47396  |
| C | -0.50083 | -0.51068 | -1.41377 |
| H | -0.03720 | -0.64564 | -2.38997 |
| C | -1.77077 | -0.91591 | -1.28806 |

|   |          |          |          |
|---|----------|----------|----------|
| H | -2.24399 | -1.36438 | -2.15926 |
| C | -2.64719 | -0.82203 | -0.04647 |
| H | -3.67415 | -1.03214 | -0.37795 |
| C | -2.69502 | 0.60940  | 0.50884  |
| O | -2.32293 | 0.87560  | 1.63643  |
| C | -3.25107 | 1.67457  | -0.41654 |
| H | -2.71281 | 1.67050  | -1.36826 |
| H | -4.30309 | 1.46138  | -0.63945 |
| H | -3.17253 | 2.65296  | 0.05845  |
| C | -2.27517 | -1.84082 | 1.03788  |
| H | -2.28677 | -2.85285 | 0.62419  |
| H | -1.27811 | -1.64205 | 1.43237  |
| H | -2.97914 | -1.79229 | 1.87283  |

**Conf1 of (Z,3S,S')-7d**

Energy (RB3LYP)= -622.052469 Hartree

|   |          |          |          |
|---|----------|----------|----------|
| C | 0.57376  | -0.24136 | 0.36648  |
| C | 1.11052  | -1.59321 | 0.90097  |
| C | 2.44813  | -1.70075 | 0.2143   |
| C | 2.85815  | -0.53511 | -0.29647 |
| C | 1.8587   | 0.58349  | 0.00453  |
| H | 0.42411  | -2.41309 | 0.66398  |
| H | 1.22496  | -1.58416 | 1.99599  |
| H | 3.01873  | -2.62442 | 0.17415  |
| H | 0.07658  | -0.46829 | -0.57963 |
| C | 1.58570  | 1.50502  | -1.19047 |
| H | 0.77278  | 2.19999  | -0.95212 |
| H | 2.46643  | 2.10211  | -1.44990 |
| H | 1.29264  | 0.92814  | -2.07364 |
| C | 2.37952  | 1.42249  | 1.18873  |
| H | 3.34252  | 1.88057  | 0.94137  |
| H | 1.68216  | 2.22910  | 1.43704  |
| H | 2.52444  | 0.80535  | 2.08086  |
| C | 4.14536  | -0.27323 | -1.01498 |
| H | 4.75994  | -1.17568 | -1.07116 |
| H | 3.96667  | 0.07955  | -2.03795 |
| H | 4.73359  | 0.50597  | -0.51417 |
| C | -0.38894 | 0.44393  | 1.28516  |
| H | -0.03725 | 0.61665  | 2.30161  |
| C | -1.62459 | 0.85721  | 0.97949  |
| H | -2.22782 | 1.32393  | 1.75757  |
| C | -2.30617 | 0.69055  | -0.36728 |
| H | -1.57906 | 0.83389  | -1.17084 |
| C | -2.7587  | -0.77133 | -0.48805 |
| O | -2.14679 | -1.55859 | -1.1866  |
| C | -3.96452 | -1.20238 | 0.3242   |
| H | -3.89703 | -0.82771 | 1.35033  |
| H | -4.87892 | -0.78728 | -0.11441 |
| H | -4.03278 | -2.29058 | 0.32454  |
| C | -3.45506 | 1.69285  | -0.54251 |
| H | -3.96997 | 1.54846  | -1.49715 |
| H | -4.19365 | 1.60218  | 0.26044  |
| H | -3.06597 | 2.71499  | -0.51881 |

**Conf2 of (Z,3S,S')-7d**

Energy (RB3LYP)= -622.045758 Hartree

|   |         |          |          |
|---|---------|----------|----------|
| C | 0.81551 | -0.78818 | 0.06662  |
| C | 1.85941 | -1.93363 | 0.12432  |
| C | 3.11302 | -1.25994 | -0.36996 |
| C | 3.01959 | 0.07348  | -0.347   |
| C | 1.66831 | 0.52604  | 0.2106   |
| H | 1.54992 | -2.79304 | -0.48125 |
| H | 1.98848 | -2.31062 | 1.15036  |
| H | 4.00002 | -1.8095  | -0.67236 |
| H | 0.4246  | -0.776   | -0.94953 |
| C | 1.03989 | 1.67622  | -0.58505 |
| H | 0.03218 | 1.88978  | -0.21556 |

|   |          |          |          |          |  |
|---|----------|----------|----------|----------|--|
| H | 1.62681  | 2.59584  | -0.49154 |          |  |
| H | 0.96844  | 1.42867  | -1.64959 |          |  |
| C | 1.84517  | 0.96109  | 1.679    |          |  |
| H | 2.53702  | 1.80646  | 1.74843  |          |  |
| H | 0.89072  | 1.27512  | 2.1134   |          |  |
| H | 2.24999  | 0.1489   | 2.29028  |          |  |
| C | 4.08514  | 1.05252  | -0.73202 |          |  |
| H | 5.00313  | 0.54145  | -1.03396 |          |  |
| H | 3.76208  | 1.68921  | -1.56451 |          |  |
| H | 4.33067  | 1.72552  | 0.09886  |          |  |
| C | -0.29338 | -0.94784 | 1.06216  |          |  |
| H | 0.06195  | -1.09106 | 2.08301  |          |  |
| C | -1.6256  | -0.97237 | 0.91953  |          |  |
| H | -2.19088 | -1.1255  | 1.83999  |          |  |
| C | -2.54963 | -0.8367  | -0.27131 |          |  |
| H | -3.20112 | -1.71948 | -0.26877 |          |  |
| C | -3.52652 | 0.33051  | -0.01688 |          |  |
| O | -4.7225  | 0.13236  | 0.07346  |          |  |
| C | -2.93651 | 1.7211   | 0.1151   |          |  |
| H | -2.19165 | 1.73783  | 0.91644  |          |  |
| H | -2.42002 | 2.00943  | -0.8065  |          |  |
| H | -3.73192 | 2.43648  | 0.32486  |          |  |
| C | -1.93686 | -0.71161 | -1.67393 |          |  |
| H | -2.73668 | -0.64261 | -2.41792 |          |  |
| H | -1.30368 | 0.1721   | -1.77639 |          |  |
| H |          | -1.33528 | -1.59207 | -1.91266 |  |

Table S7 Olfactory evaluation

| Fragrance                                        | Olfactory description                                                                                                                                                                                                                                                                               | Leffingwell odour evaluation <sup>35</sup>                                                                                                                                            |
|--------------------------------------------------|-----------------------------------------------------------------------------------------------------------------------------------------------------------------------------------------------------------------------------------------------------------------------------------------------------|---------------------------------------------------------------------------------------------------------------------------------------------------------------------------------------|
| <b>1a</b> -(2 <i>S</i> , <i>S'</i> )             | Much more pungent and unpleasant than <b>1a</b> -(2 <i>R</i> , <i>S'</i> ). The head impact is 7/10, but over time it loses a lot in tenacity. Within 2 hours it reaches around 2.5/10.                                                                                                             | Weak and less preferred enantiomer. Odour Threshold = 166.0 ppb. <sup>36</sup>                                                                                                        |
| <b>1a</b> -(2 <i>R</i> , <i>S'</i> )             | Round smell and closest to commercial Brahmanol®. It is creamy, sandalwood without the earthy-amber component, making it more pleasant. Head Impact is slightly stronger than commercial Brahmanol® (6.5/10) and over time maintains its olfactory note and tenacity well (6.5/10).                 | Peculiar sandalwood's strongly excellent smell. Odour Threshold = 14.5 ppb. <sup>36</sup>                                                                                             |
| <b>1b</b> -(2 <i>S</i> , <i>R'</i> )             | Impact 6.5/10. Olfactory profile a little creamier than commercial Firsantol®. Tenacity: 6.5/10 (more tenacious than commercial Firsantol®).                                                                                                                                                        | Sandalwood note is not as powerful as the <b>1b</b> -(2 <i>R</i> , <i>R'</i> )-isomer but is accompanied of a more marked woody-cedar character. Odour Threshold = NA. <sup>17a</sup> |
| <b>1b</b> -(2 <i>R</i> , <i>R'</i> )             | Impact: 8.5/10. It has a very impactful note on the head, but unpleasant and pungent. Tends to lose the unpleasant note over time. Loses tenacity over time (6/10).                                                                                                                                 | Elegant and powerful sandalwood note. Preferred of the four isomers. Odour Threshold = NA. <sup>17a</sup>                                                                             |
| <b>1c</b> -(2 <i>R</i> ,3 <i>S</i> , <i>S'</i> ) | It has the amber-woody component of Sandalore® and slightly less of the creamy component. It also has a tobacco note that is pleasant. After the first few minutes the impact seems to be stronger than the commercial Sandalore® (7.5/10). Very tenacious, holds the note well over time (7.5/10). | -                                                                                                                                                                                     |
| <b>1c</b> -(2 <i>S</i> ,3 <i>S</i> , <i>S'</i> ) | It has an unpleasant head impact (7/10). After a few minutes, although remaining unpleasant, the intensity of the note drops significantly compared to the <b>1c</b> -(2 <i>R</i> ,3 <i>S</i> , <i>S'</i> ), (3.5/10).                                                                              | -                                                                                                                                                                                     |
| <b>1c</b> -(2 <i>S</i> ,3 <i>R</i> , <i>S'</i> ) | Impact 8/10. It has the creamy appearance of sandalwood. Very tenacious even over time 9/10 (the most tenacious of all diastereoisomers).                                                                                                                                                           | -                                                                                                                                                                                     |
| <b>1c</b> -(2 <i>R</i> ,3 <i>R</i> , <i>S'</i> ) | Impact 7/10. Olfactory similar to <b>1c</b> -(2 <i>R</i> ,3 <i>S</i> , <i>S'</i> ), but slightly creamier and less dry. Less tenacious than <b>1c</b> -(2 <i>R</i> ,3 <i>S</i> , <i>S'</i> ): tenacity approximately 3/10.                                                                          | -                                                                                                                                                                                     |

**Copies of  $\alpha$ -pinene chiral GC chromatograms**

The *ee* of (-) and (+)- $\alpha$ -pinene were evaluated by chiral GC analysis on a CP7502 Chirasil-DEX CB column (25 m x 0.25 mm x 0.25  $\mu$ m). Program temperature: 80  $^{\circ}$ C (1 min)/5  $^{\circ}$ C min<sup>-1</sup>/150  $^{\circ}$ C (1 min)/60  $^{\circ}$ C min<sup>-1</sup>/200  $^{\circ}$ C (2 min).

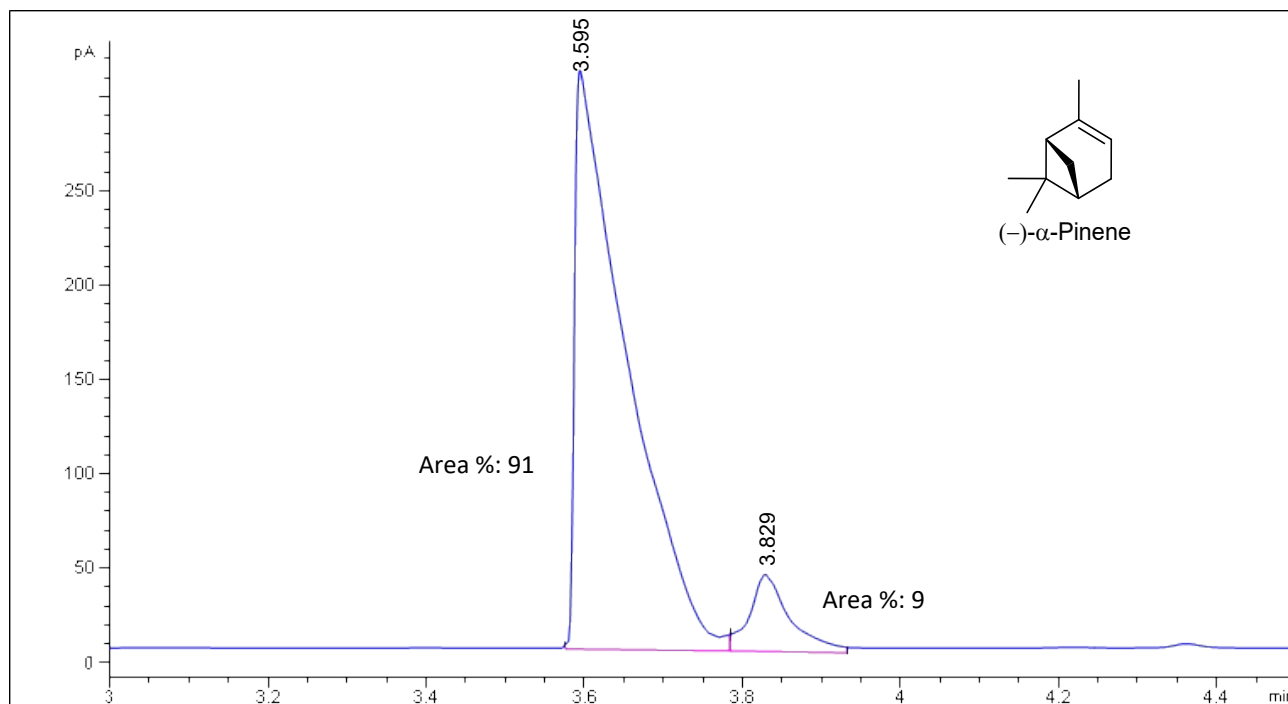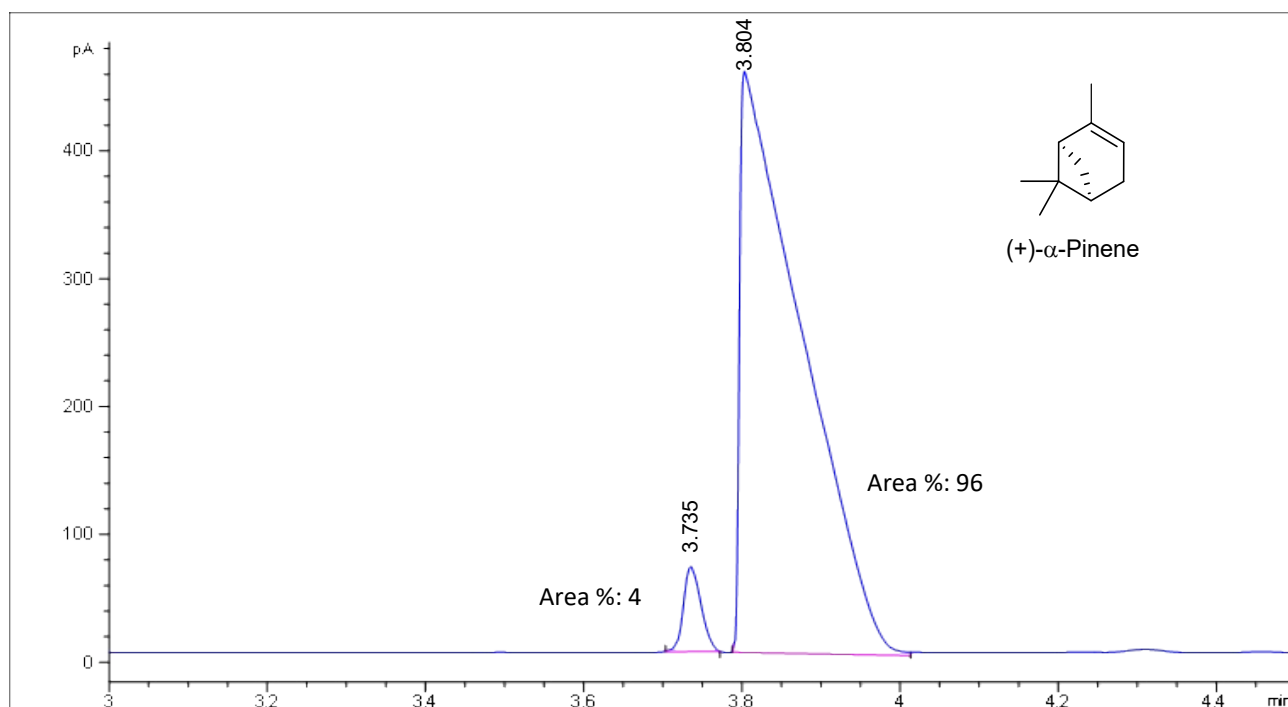

Table S8 Simplified Environmental factor (sEF) analysis

|                 | Chemo reductive process      |              |                             |             | Bio reductive process |             |
|-----------------|------------------------------|--------------|-----------------------------|-------------|-----------------------|-------------|
|                 | LiAlH <sub>4</sub> [ref. 38] |              | H <sub>2</sub> [ref. 36]    |             | OYE2+Evo440           |             |
|                 | Materials                    | Mass (g)     | Materials                   | Mass (g)    | Materials             | Mass (g)    |
| <b>Reagents</b> | <b>4a</b>                    | 96.00        | Allylic alcohol             | 5.00        | <b>4a</b>             | 0.58        |
|                 | LiAlH <sub>4</sub>           | 7.50         | Ru cat.                     | 0.02        | OYE2                  | 0.02        |
|                 |                              | 103.50       | H <sub>2</sub> <sup>a</sup> | 0.99        | Evo440                | 0.04        |
|                 |                              |              |                             | 6.01        | GDH                   | 0.08        |
|                 |                              |              |                             |             | NADP <sup>+</sup>     | 0.03        |
|                 |                              |              |                             |             | Glucose               | 4.20        |
|                 |                              |              |                             |             | 4.94                  |             |
| <b>Product</b>  | Allylic alcohol              | <b>82.60</b> | (S',S)-1a                   | <b>4.30</b> |                       | <b>0.49</b> |
| <b>Waste</b>    |                              | <b>20.90</b> |                             | <b>1.72</b> |                       | <b>4.44</b> |
| <b>sEF</b>      |                              | <b>0.25</b>  |                             | <b>0.40</b> |                       | <b>8.99</b> |

a) Autoclave hydrogenation volume of 0.3 L assuming an ideal behavior of H<sub>2</sub>.

Table S9 Complete Environmental factor (cEF) analysis

|                 | Chemo reductive process         |        |          |               |                             |        |          |              | Bio reductive process |        |          |               |
|-----------------|---------------------------------|--------|----------|---------------|-----------------------------|--------|----------|--------------|-----------------------|--------|----------|---------------|
|                 | LiAlH <sub>4</sub> <sup>a</sup> |        |          |               | H <sub>2</sub> [ref. 36]    |        |          |              | OYE2+Evo440           |        |          |               |
|                 | Materials                       | V (mL) | d (g/mL) | Mass (g)      | Materials                   | V (mL) | d (g/mL) | g            | Materials             | V (mL) | d (g/mL) | g             |
| <b>Reagents</b> | <b>4a</b>                       |        |          | 2.00          | Allylic alcohol             |        |          | 5.00         | <b>4a</b>             |        |          | 0.58          |
|                 | LiAlH <sub>4</sub>              |        |          | 0.16          | Ru cat.                     |        |          | 0.02         | OYE2                  |        |          | 0.02          |
|                 |                                 |        |          | 2.16          | H <sub>2</sub> <sup>b</sup> |        |          | 0.99         | Evo440                |        |          | 0.04          |
|                 |                                 |        |          |               |                             |        |          | 6.01         | GDH                   |        |          | 0.08          |
|                 |                                 |        |          |               |                             |        |          |              | NADP <sup>+</sup>     |        |          | 0.03          |
|                 |                                 |        |          |               |                             |        |          |              | Glucose               |        |          | 4.20          |
|                 |                                 |        |          |               |                             |        |          |              |                       |        | 4.94     |               |
| <b>Product</b>  | Allylic alcohol                 |        |          | <b>1.70</b>   | (S',S)-1a                   |        |          | <b>4.30</b>  |                       |        |          | <b>0.49</b>   |
| <b>Solvents</b> | Et <sub>2</sub> O               | 120    | 0.71     | 85.56         | MeOH                        | 20     | 0.79     | 15.84        | KPi Buffer            | 15     |          | 15.00         |
|                 | Seignette sol.                  | 30     | 1.0      | 30.00         |                             |        |          |              | <i>i</i> -PrOH        | 0.80   | 0.79     | 0.63          |
|                 | Brine                           | 30     | 1.0      | 30.00         |                             |        |          |              | AcOEt                 | 60     | 0.90     | 54.12         |
|                 |                                 |        |          | 145.56        |                             |        |          |              | Water                 | 10     |          | 10.00         |
|                 |                                 |        |          |               |                             |        |          | Resin        |                       |        | 5.00     |               |
|                 |                                 |        |          |               |                             |        |          |              |                       |        | 84.75    |               |
| <b>Waste</b>    |                                 |        |          | <b>146.02</b> |                             |        |          | <b>17.56</b> |                       |        |          | <b>89.19</b>  |
| <b>cEF</b>      |                                 |        |          | <b>85.89</b>  |                             |        |          | <b>4.08</b>  |                       |        |          | <b>180.55</b> |

a) The reduction of **4a** was replicated based on a patent procedure [ref. 38], see below ; b) Autoclave hydrogenation volume of 0.3 L assuming an ideal behavior of H<sub>2</sub>.

Table S10 Semi-quantitative ECOScale analysis <sup>37</sup>

| Parameters                           | Chemo reductive process         |             |                          |                | Bio reductive process |           |
|--------------------------------------|---------------------------------|-------------|--------------------------|----------------|-----------------------|-----------|
|                                      | LiAlH <sub>4</sub> <sup>a</sup> |             | H <sub>2</sub> [ref. 36] |                | OYE2+Evo440           |           |
|                                      | Issue                           | Penalty     | Issue                    | Penalty        | Issue                 | Penalty   |
| <b>Stereoselectivity<sup>b</sup></b> | -                               | -           | 88:12                    | 12             | 99:1                  | 1         |
|                                      | Simple filtration               | 0           | Simple filtration        | -              | Solid phase extract.  | 2         |
| <b>Work-up/purification</b>          | Water wash                      | 3           | Water wash               | -              | Water wash            | 3         |
|                                      | Distillation                    | 3           | Distillation             | 3              | Distillation          | 3         |
| <b>Risk and hazards</b>              | LiAlH <sub>4</sub>              | 5           | Ru cat.                  | 5              | OYE2                  | 0         |
|                                      | Et <sub>2</sub> O               | 10          | H <sub>2</sub>           | 10             | Evo440                | 0         |
|                                      | Seignette sol.                  | 0           | MeOH                     | 5              | GDH                   | 0         |
|                                      | Brine                           | 0           |                          |                | NADP <sup>+</sup>     | 0         |
|                                      |                                 |             |                          |                | Glucose               | 0         |
|                                      |                                 |             |                          | KPi Buffer     | 0                     |           |
|                                      |                                 |             |                          | <i>i</i> -PrOH | 5                     |           |
|                                      |                                 |             |                          | AcOEt          | 3                     |           |
| <b>Temp. and time</b>                | 0 °C, 1 h                       | 4           | 80 °C, 24 h              | 3              | 30 °C, 24 h           | 1         |
| <b>Technical set-up</b>              | Inert atm.                      | 1           | High pressure            | 3              | Common                | 0         |
|                                      | No pot economy                  | 2.5         | No pot economy           | 2.5            | Pot economy           | 0         |
| <b>Nature of waste</b>               | Non-biodegradable               | 3           | Non-biodegradable        | 3              | Biodegradable         | 0         |
|                                      | Heavy metals                    | -           | Heavy metals             | 3              | Heavy metals          | -         |
| <b>Resource depletion</b>            | -                               | 0           | Ru cat.                  | 5              | -                     | 0         |
| <b>ECOScale</b>                      |                                 | <b>68.5</b> |                          | <b>45.5</b>    |                       | <b>82</b> |
| <b>Average EcoScale</b>              |                                 | <b>57</b>   |                          |                |                       | <b>82</b> |

a) The reduction of **4a** was replicated based on a patent procedure [ref. 38], see below; b) Penalty = [100-ee]/2.

### (*R,E*)-2-methyl-4-(2,2,3-trimethylcyclopent-3-en-1-yl)but-2-en-1-ol

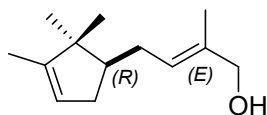

To an ice-cooled and well stirred solution of **4a** (2.0 g) in dry Et<sub>2</sub>O (30 mL) was portion wise added LiAlH<sub>4</sub> (158.3 mg), usually over 15 minutes. Then, the mixture was left to reach room temperature and after 1 hours the reaction was ice-cooled and quenched with a Seignette solution (sat., 30 mL) and left to stir over 1 hour. Then the mixture was washed with Et<sub>2</sub>O (3 x 30 mL). The combined organic phase was washed with brine (sat., 30 mL), dried over anhydrous Na<sub>2</sub>SO<sub>4</sub> and concentrated under *vacuum* affording the product as a yellow liquid, which was purified by distillation.

Yield 85% (1.7 g) as a pale-yellow oil; tr= 18.0 min, 94% purity by GC-MS; <sup>1</sup>H-NMR (CDCl<sub>3</sub>, 400 MHz): δ 5.42 (m, 1H), 5.20 (m, 1H), 3.97 (s, 2H), 2.32-2.10 (m, 2H), 2.01-1.93 (m, 1H), 1.86-1.73 (m, 2H), 1.66 (s, 3H), 1.58 (m, 3H), 0.98 (s, 3H), 0.78 (s, 3H); <sup>13</sup>C{<sup>1</sup>H}-NMR (CDCl<sub>3</sub>, 101 MHz): δ 148.6, 134.8, 126.0, 121.8, 69.1, 50.5, 46.8, 35.7, 28.3, 26.0, 19.8, 13.8, 12.7; GC-MS: m/z (%): 194 (M<sup>+</sup>, 28), 121 (100), 108 (93), 95 (87).



2

 $^1\text{H-NMR}$  ( $\text{CDCl}_3$ , 400 MHz)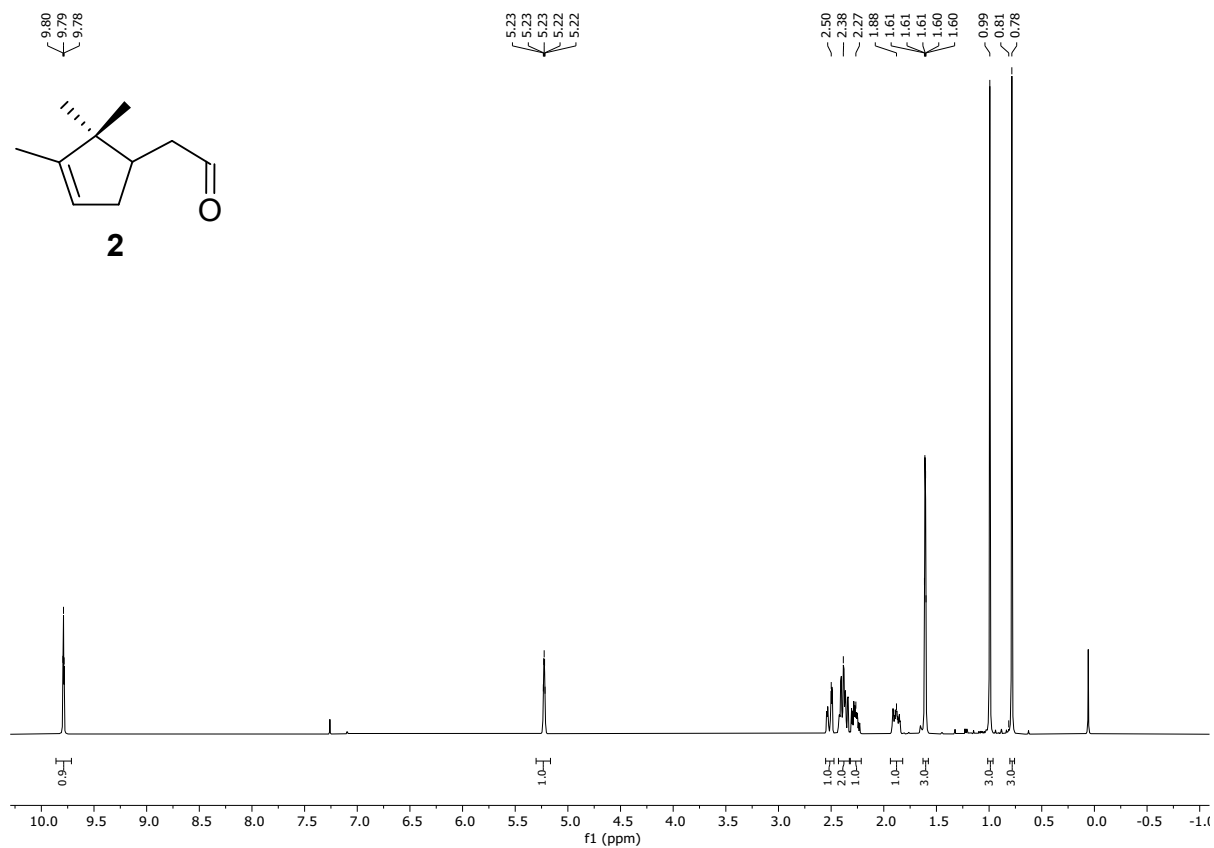 $^{13}\text{C}\{^1\text{H}\}$ -NMR ( $\text{CDCl}_3$ , 101 MHz)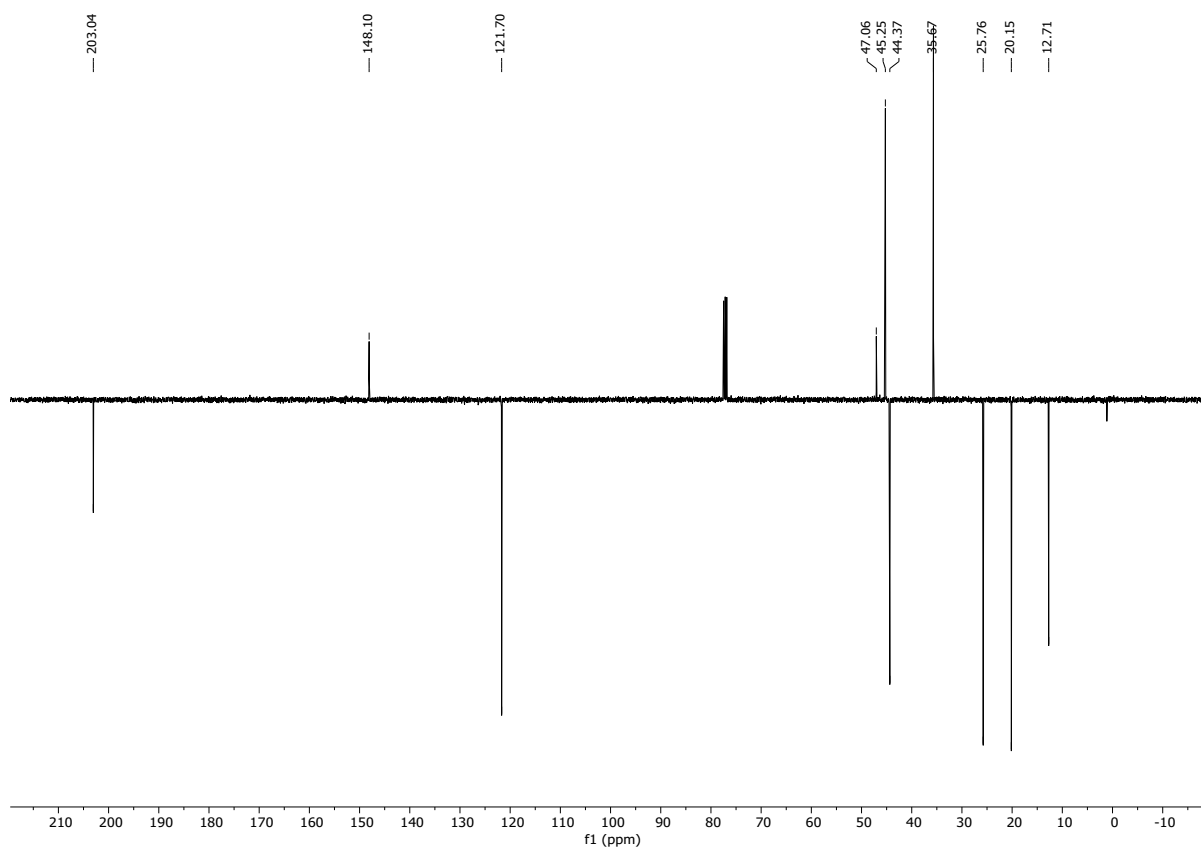



**Trichloroacetonitrile** $^{13}\text{C}\{^1\text{H}\}$ -NMR ( $\text{CDCl}_3$ , 101 MHz)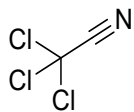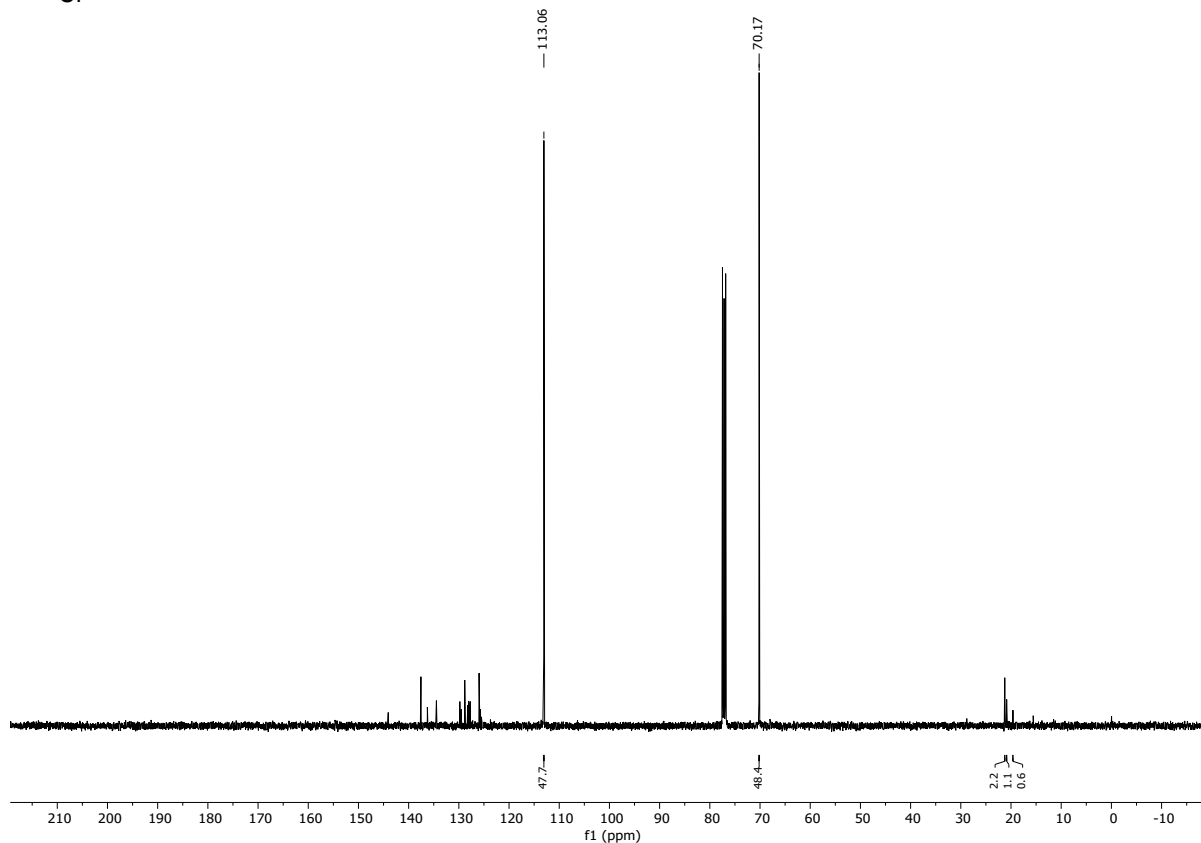

Integration of  $\text{CCl}_3\text{CN}$  signals *versus* xylenes methyl group signals enables the determination of  $\text{CCl}_3\text{CN}$  purity (97.1% w/w).

Glucose and H<sub>2</sub>O<sub>2</sub><sup>13</sup>C{<sup>1</sup>H}-NMR (CDCl<sub>3</sub>, 101 MHz)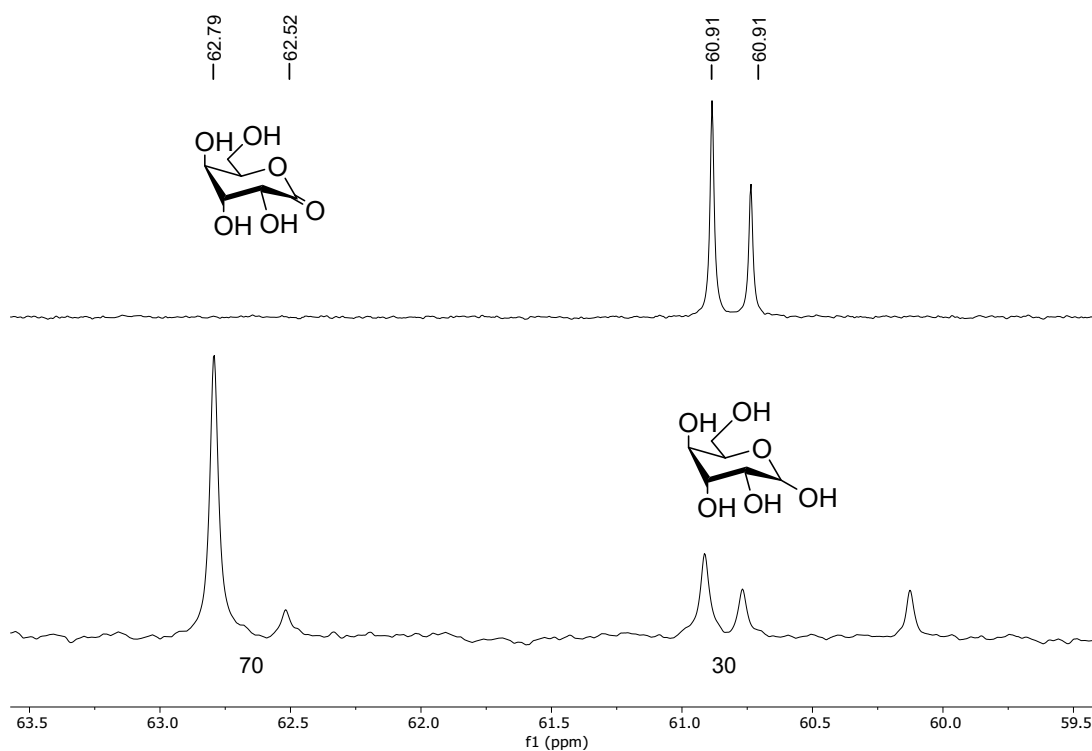

An aliquot of reaction mixture (400 μL) was analyzed by <sup>13</sup>C-NMR with a coaxial tube capillary filled with D<sub>2</sub>O. Integration of CH<sub>2</sub>OH signal of α-D-glucose *versus* CH<sub>2</sub>OH signal of α-D-gluconolactone gave a conversion of 70%, which corresponds to a 1.2% w/v concentration of H<sub>2</sub>O<sub>2</sub>.

## 4a

 $^1\text{H-NMR}$  ( $\text{CDCl}_3$ , 400 MHz)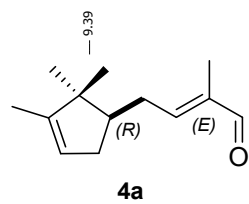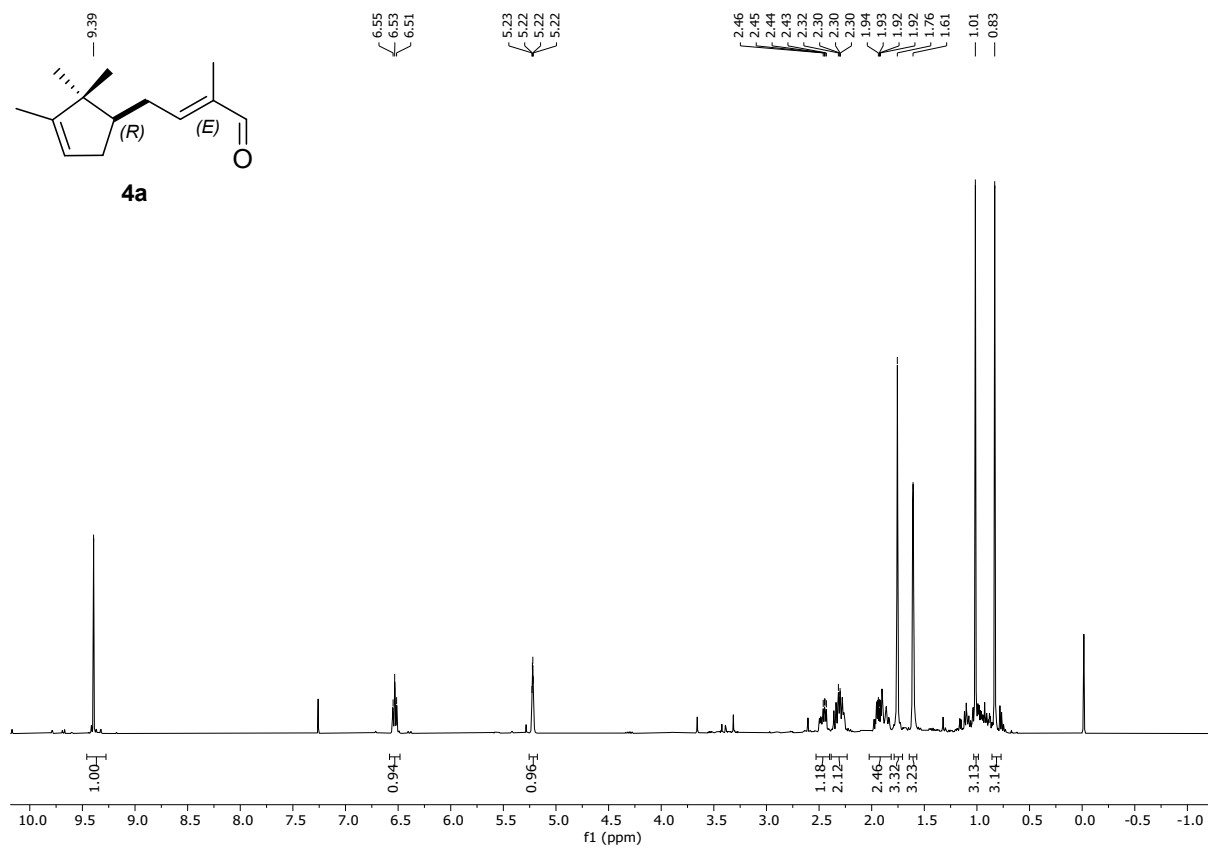 $^{13}\text{C}\{^1\text{H}\}$ -NMR ( $\text{CDCl}_3$ , 101 MHz)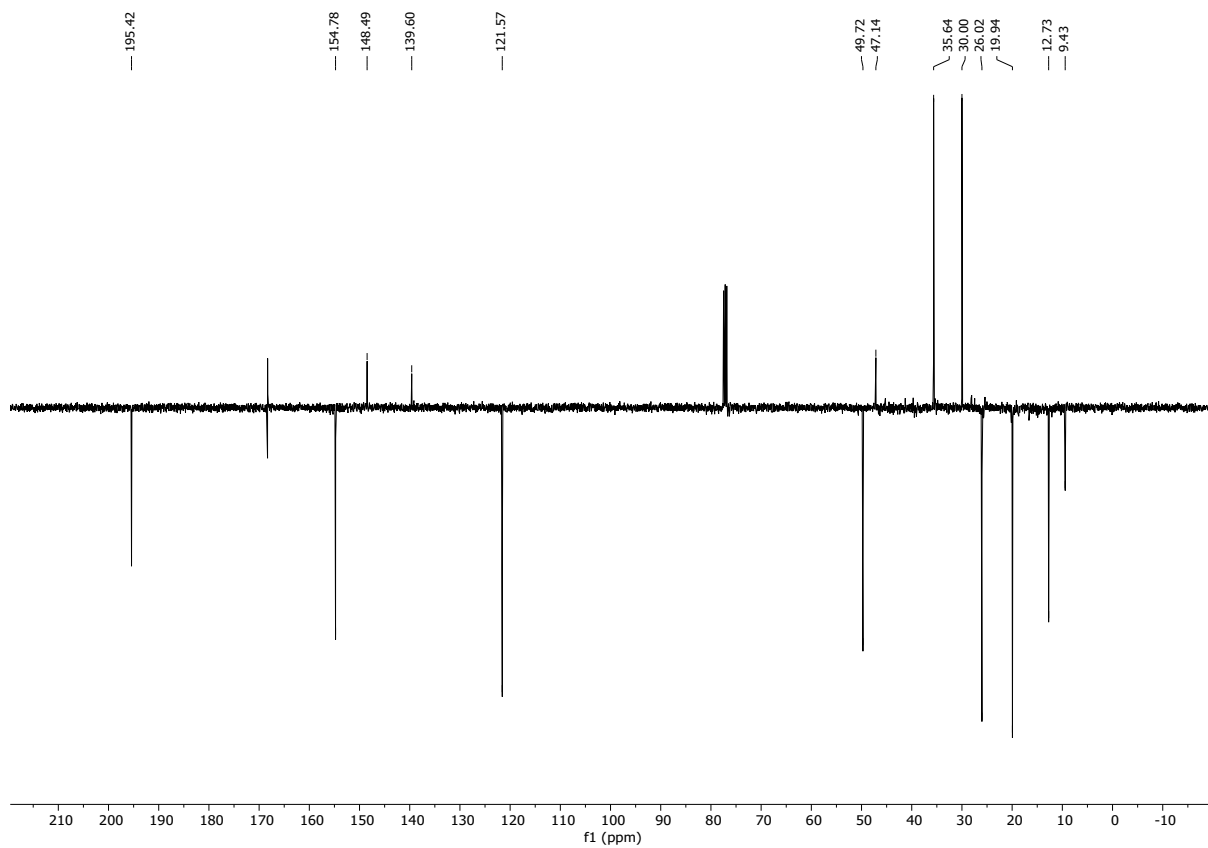

## 4c

 $^1\text{H-NMR}$  ( $\text{CDCl}_3$ , 400 MHz)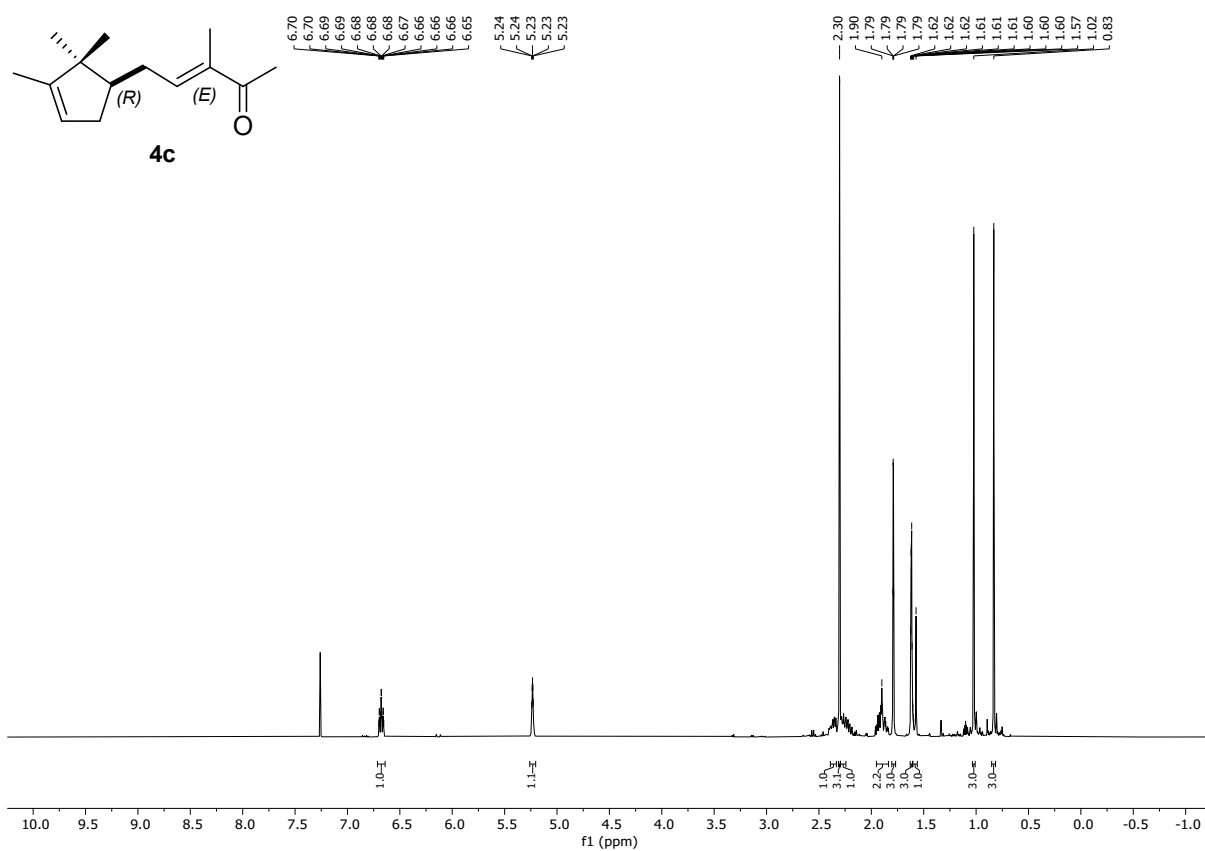 $^{13}\text{C}\{^1\text{H}\}$ -NMR ( $\text{CDCl}_3$ , 101 MHz)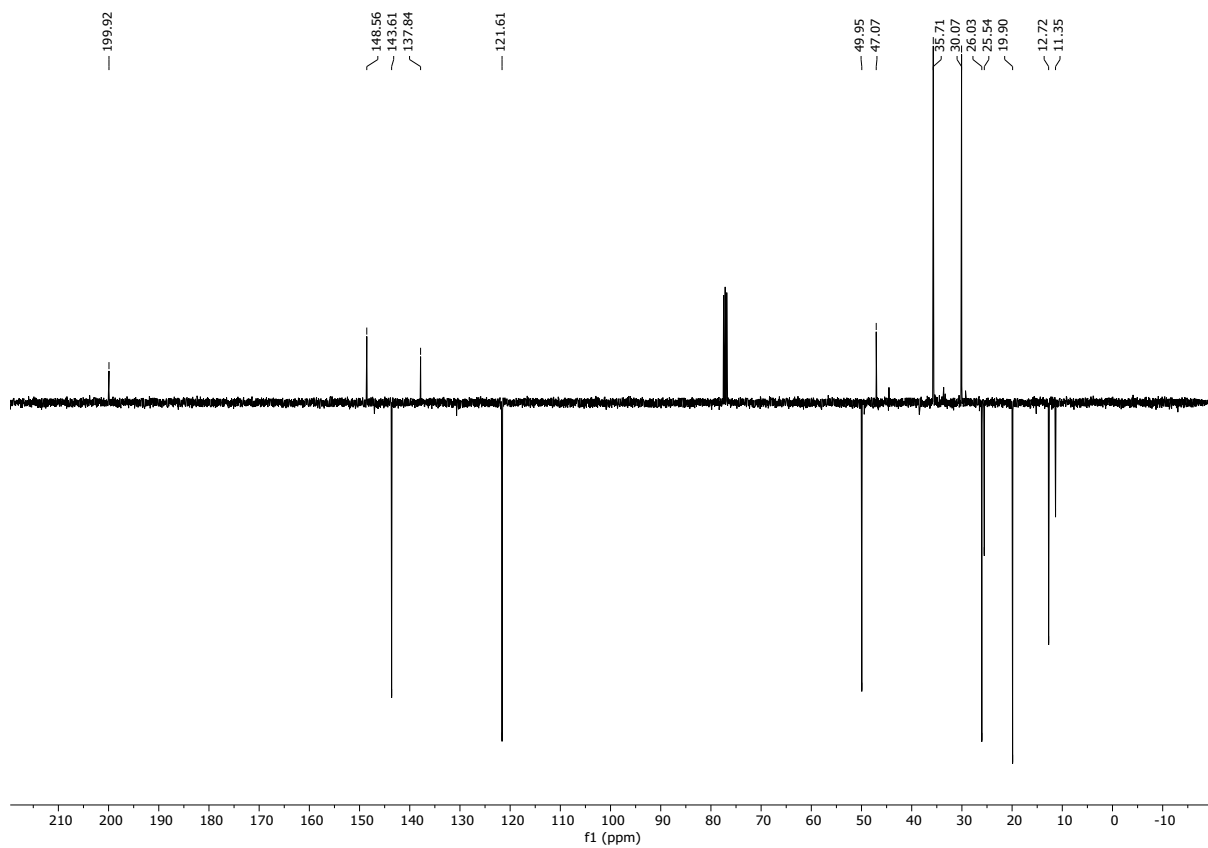



10

 $^1\text{H-NMR}$  ( $\text{CDCl}_3$ , 400 MHz)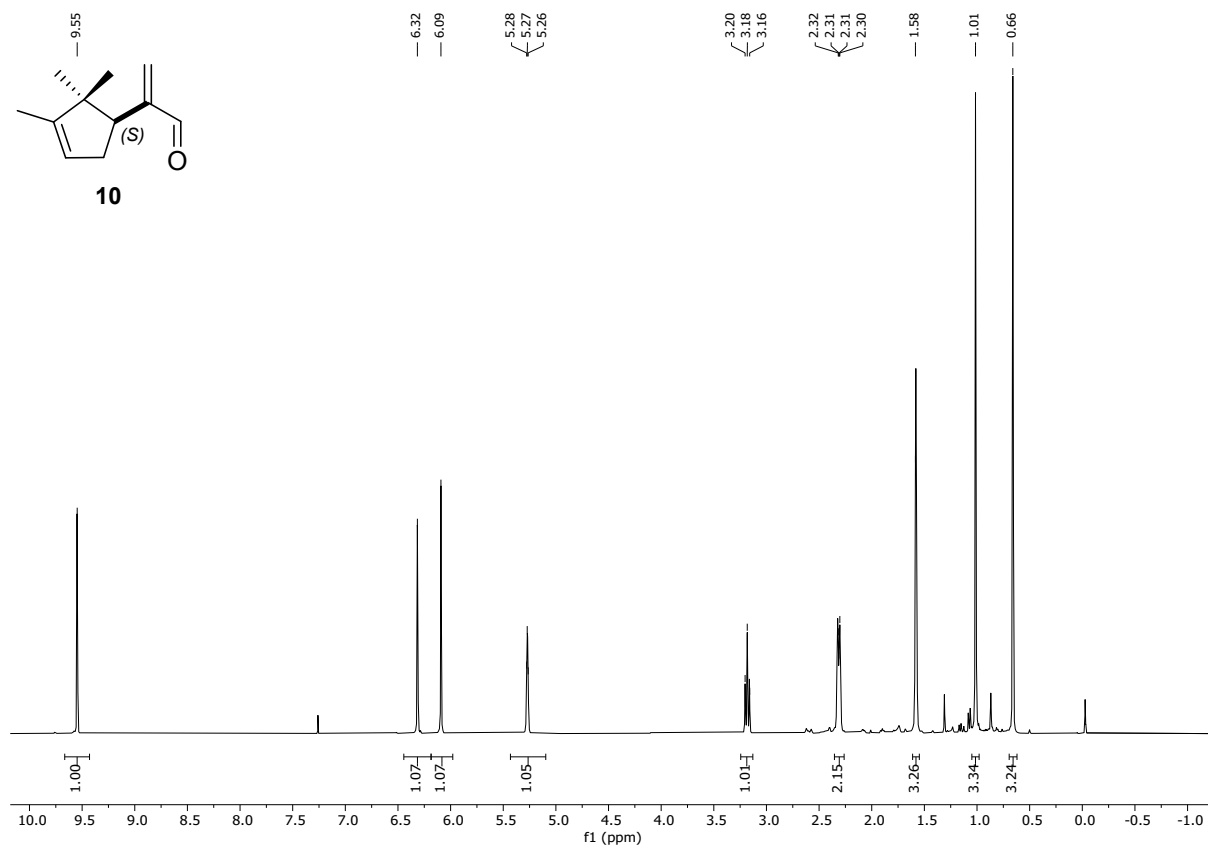 $^{13}\text{C}\{^1\text{H}\}$ -NMR ( $\text{CDCl}_3$ , 101 MHz)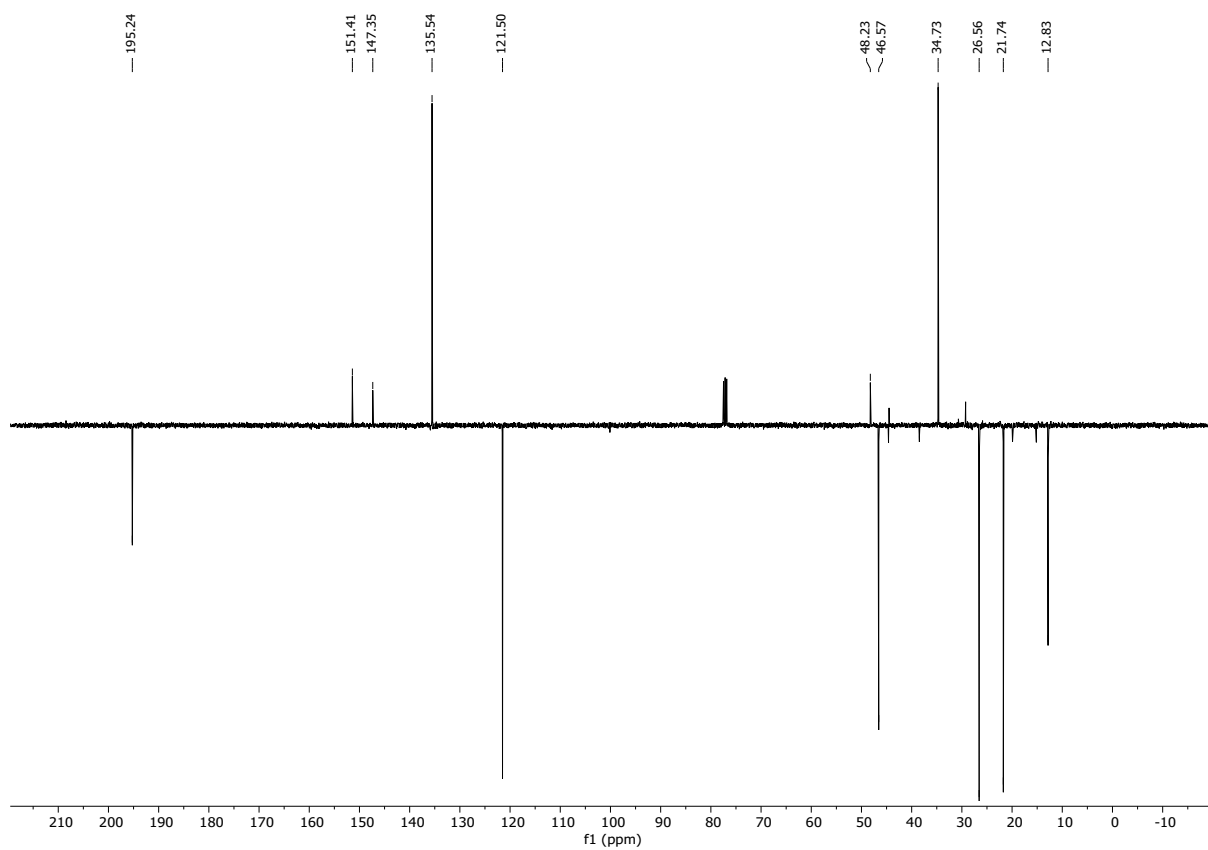

## 11

 $^1\text{H-NMR}$  ( $\text{CDCl}_3$ , 400 MHz)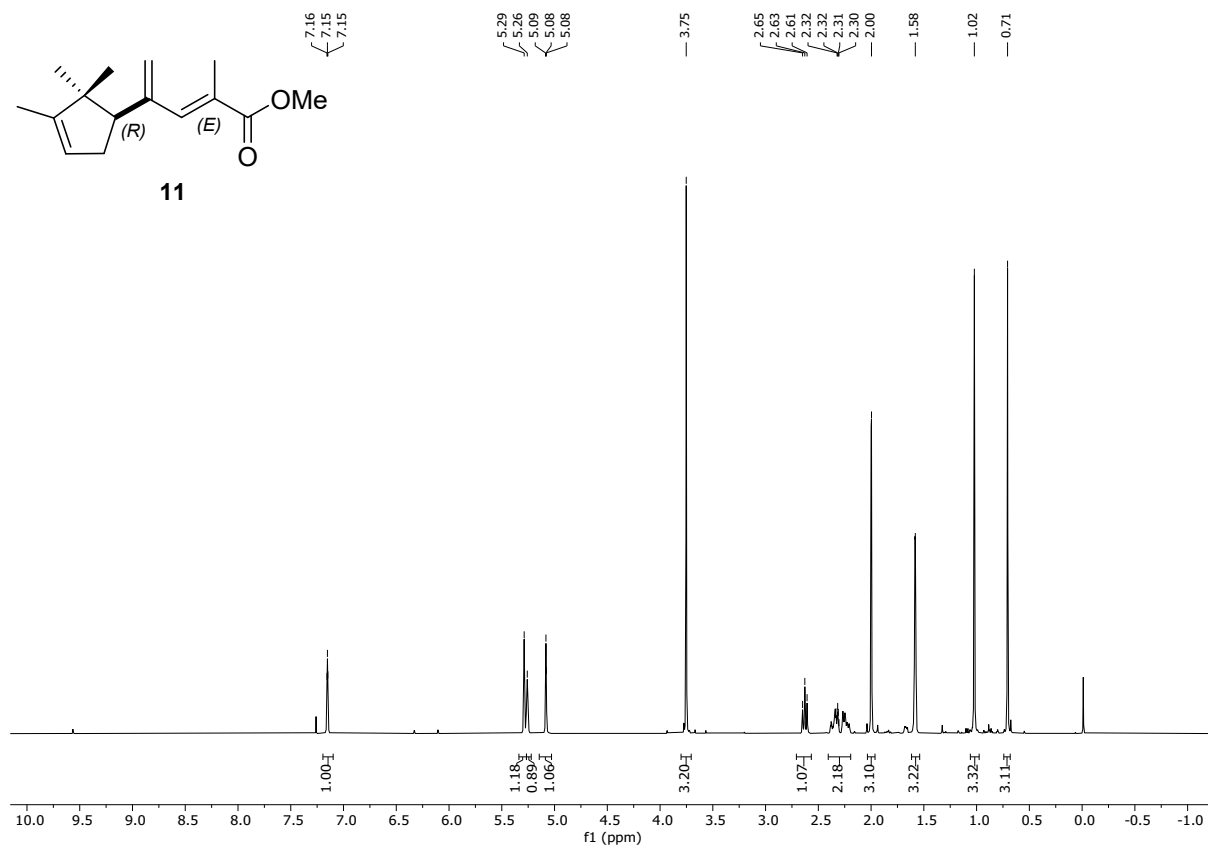 $^{13}\text{C}\{^1\text{H}\}$ -NMR ( $\text{CDCl}_3$ , 101 MHz)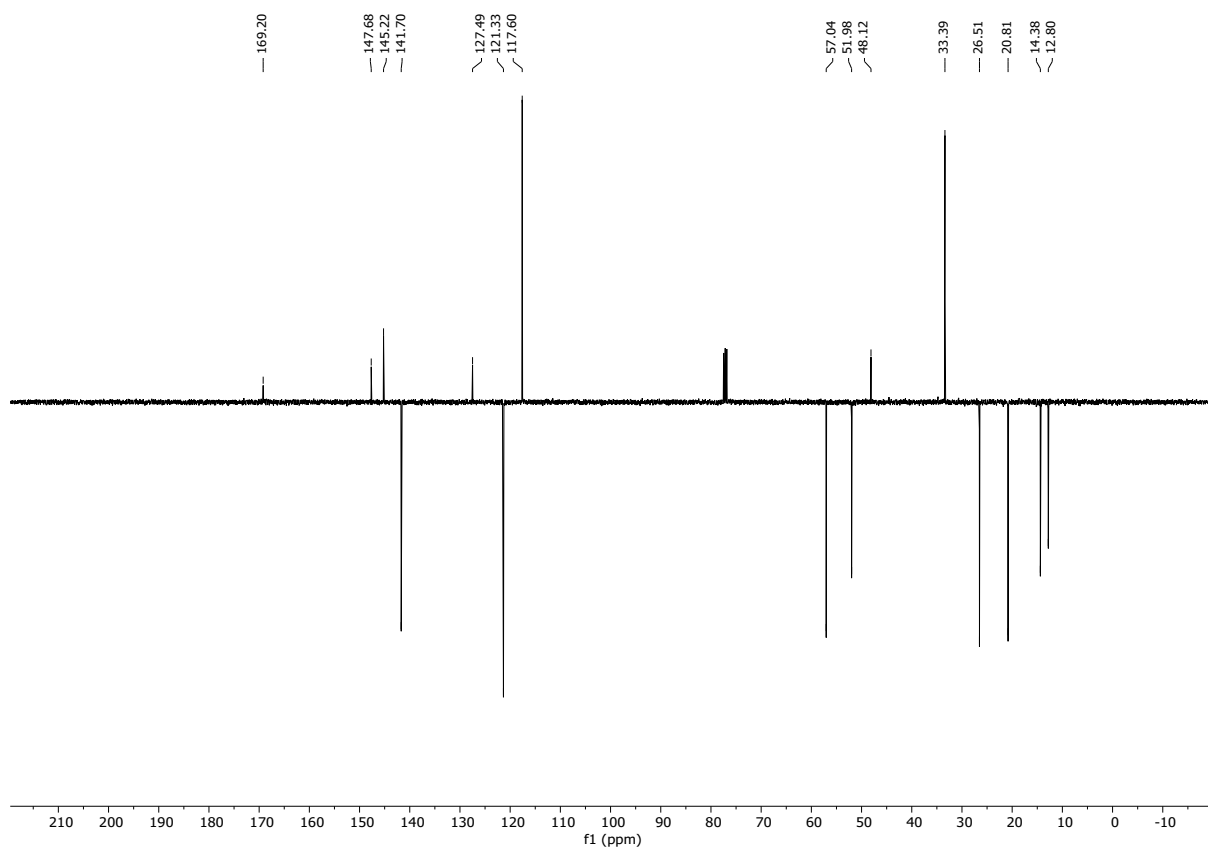

12

 $^1\text{H-NMR}$  ( $\text{CDCl}_3$ , 400 MHz)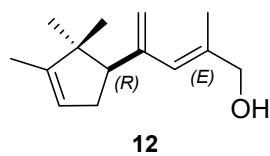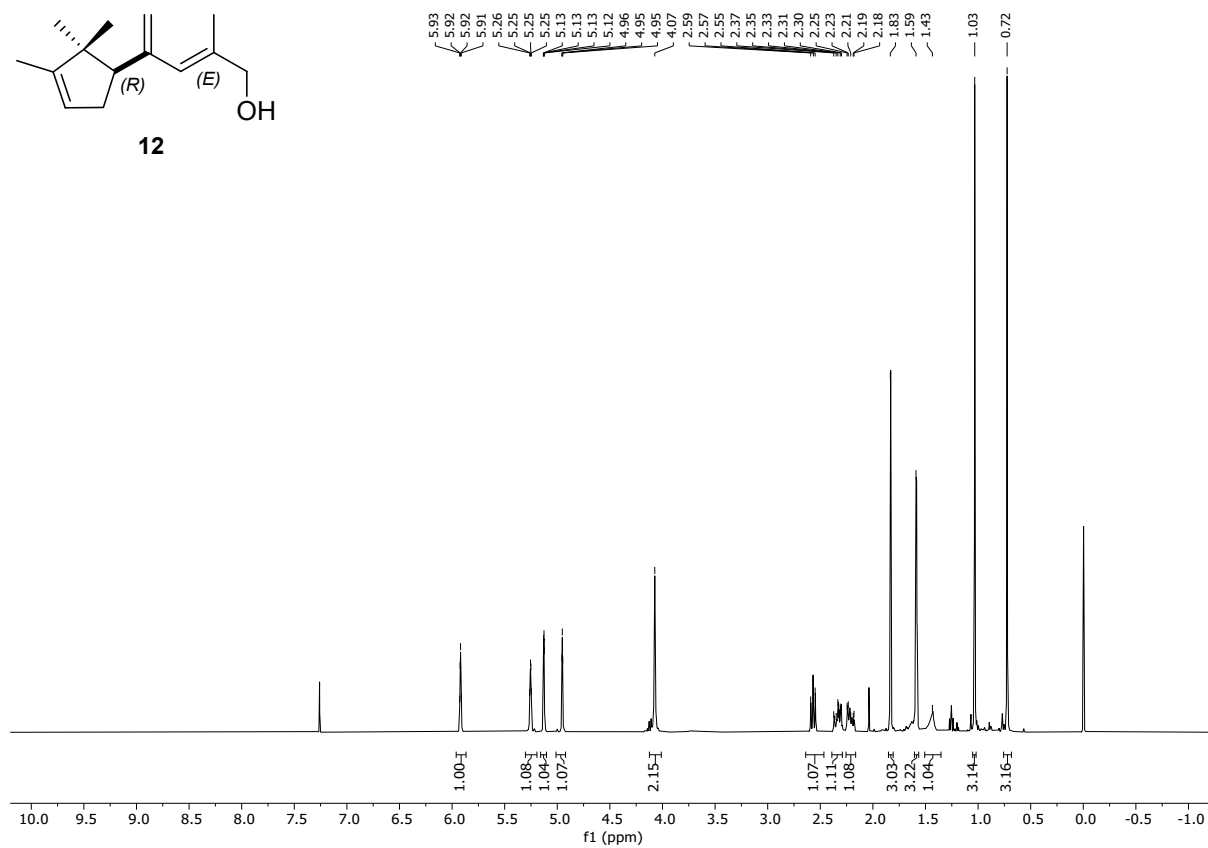 $^{13}\text{C}\{^1\text{H}\}$ -NMR ( $\text{CDCl}_3$ , 101 MHz)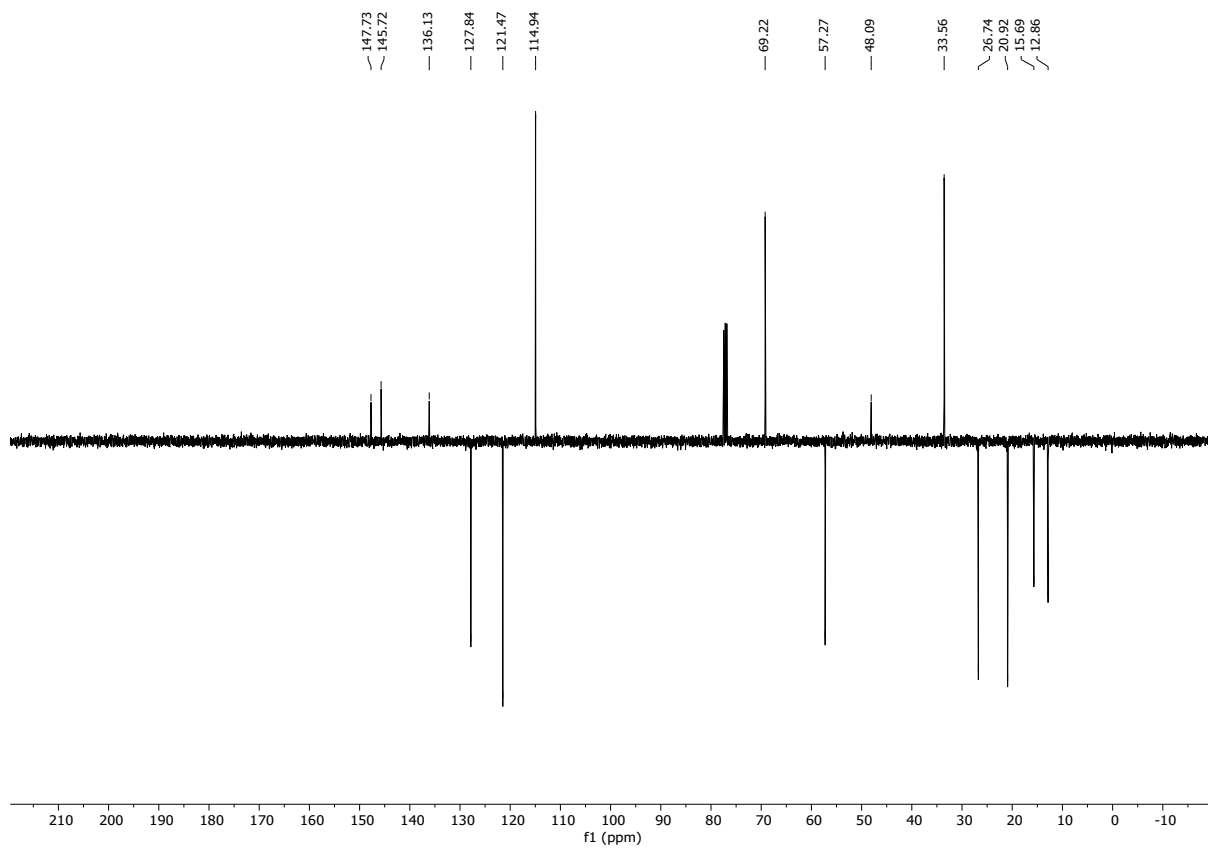



## 4b

 $^1\text{H-NMR}$  ( $\text{CDCl}_3$ , 400 MHz)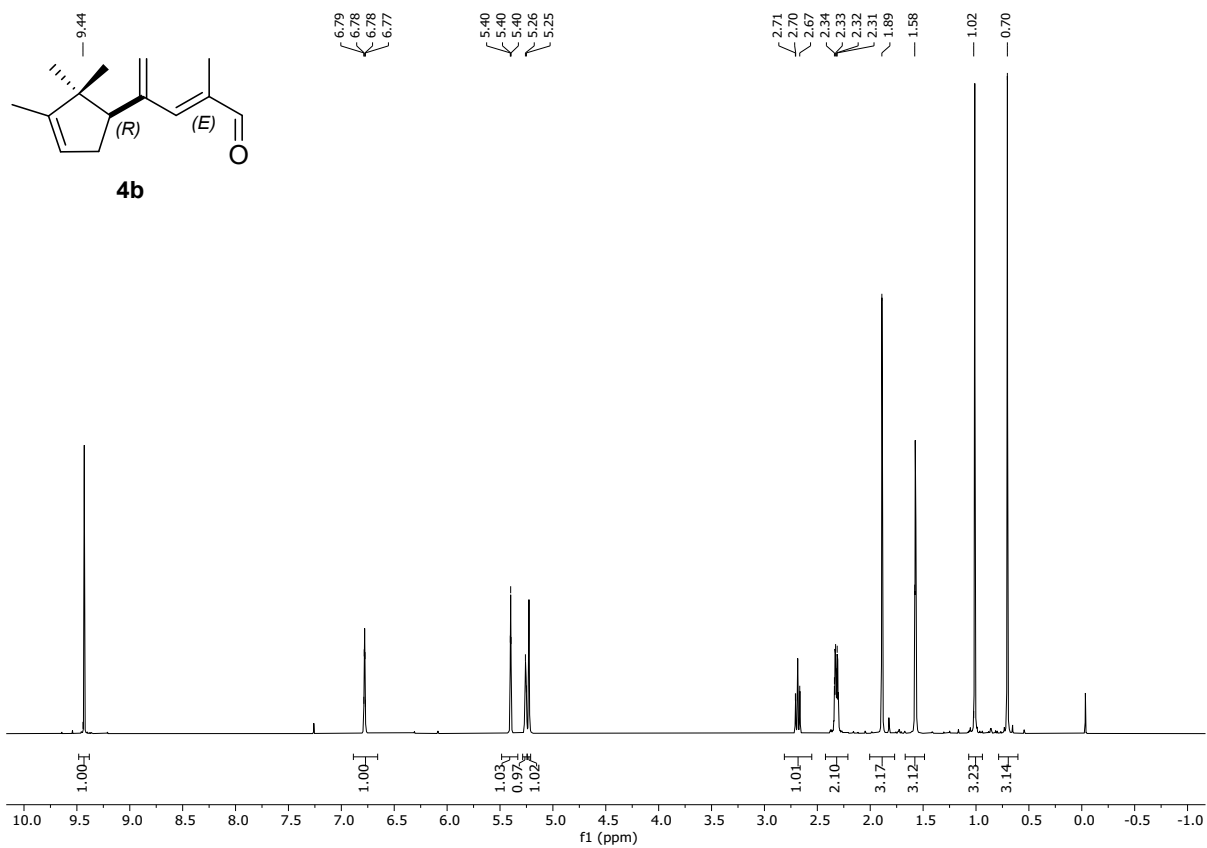 $^{13}\text{C}\{^1\text{H}\}$ -NMR ( $\text{CDCl}_3$ , 101 MHz)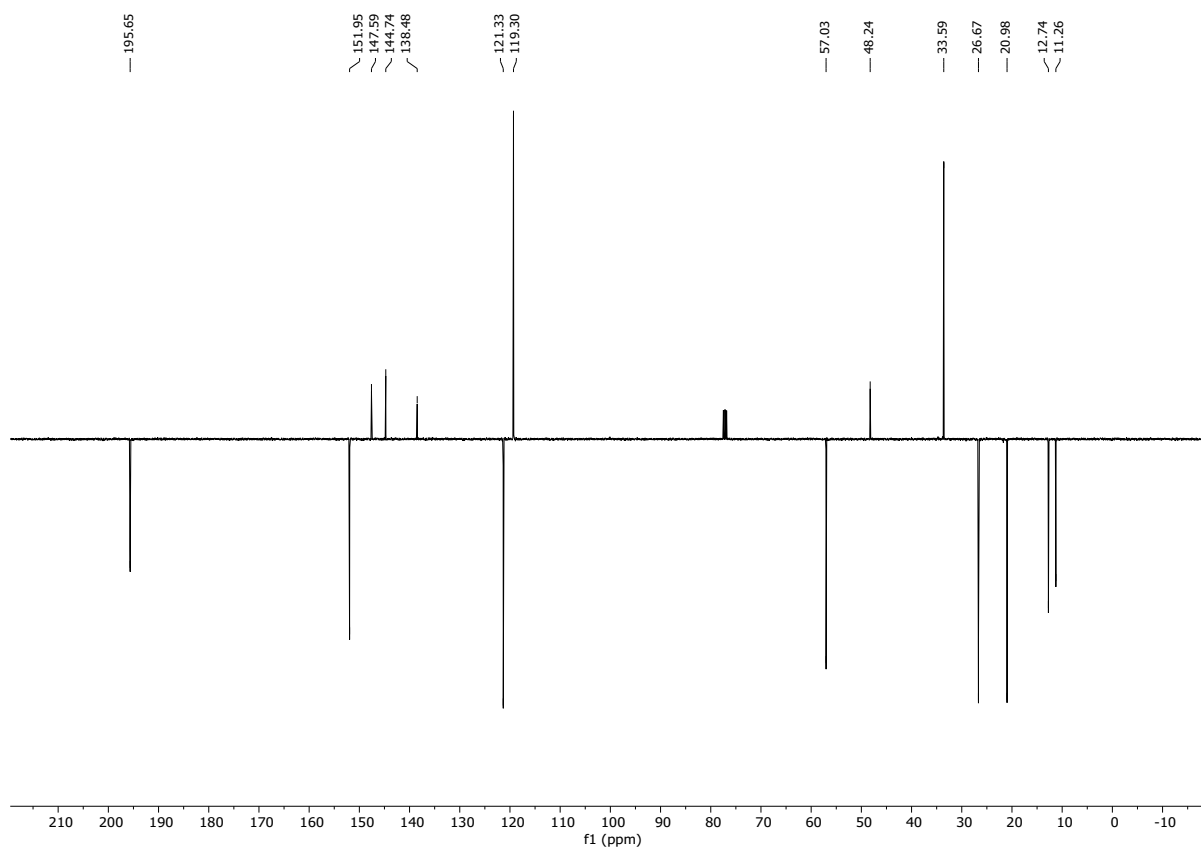

13

 $^1\text{H-NMR}$  ( $\text{CDCl}_3$ , 400 MHz)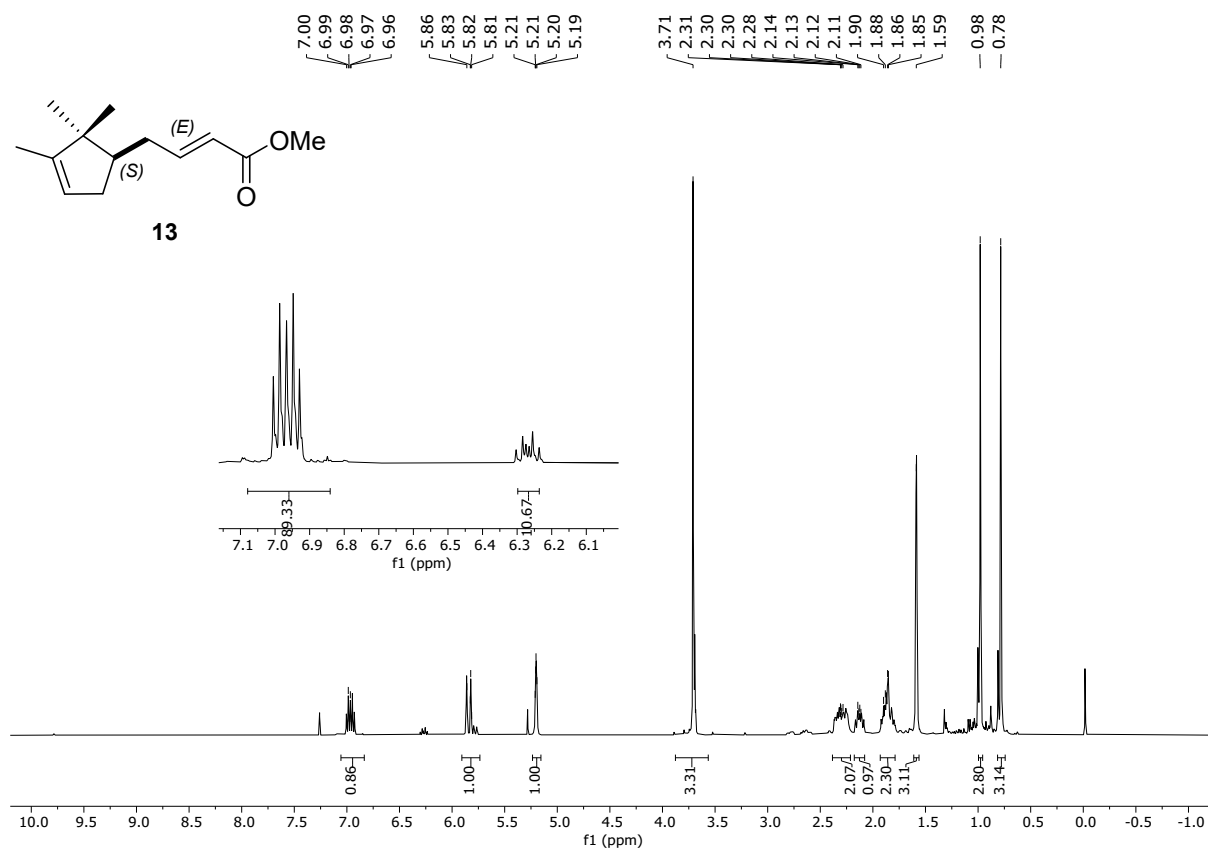 $^{13}\text{C}\{^1\text{H}\}$ -NMR ( $\text{CDCl}_3$ , 101 MHz)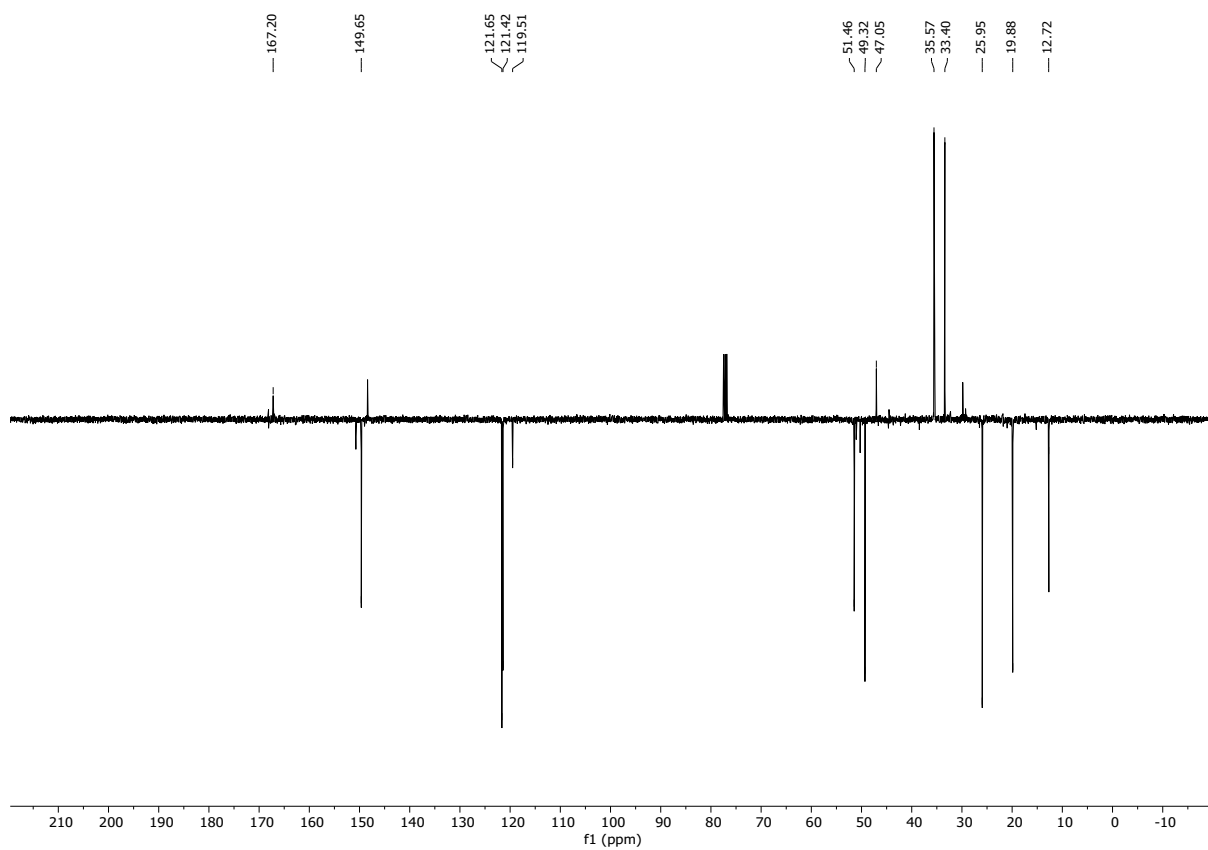

14

 $^1\text{H-NMR}$  ( $\text{CDCl}_3$ , 400 MHz)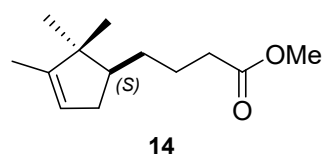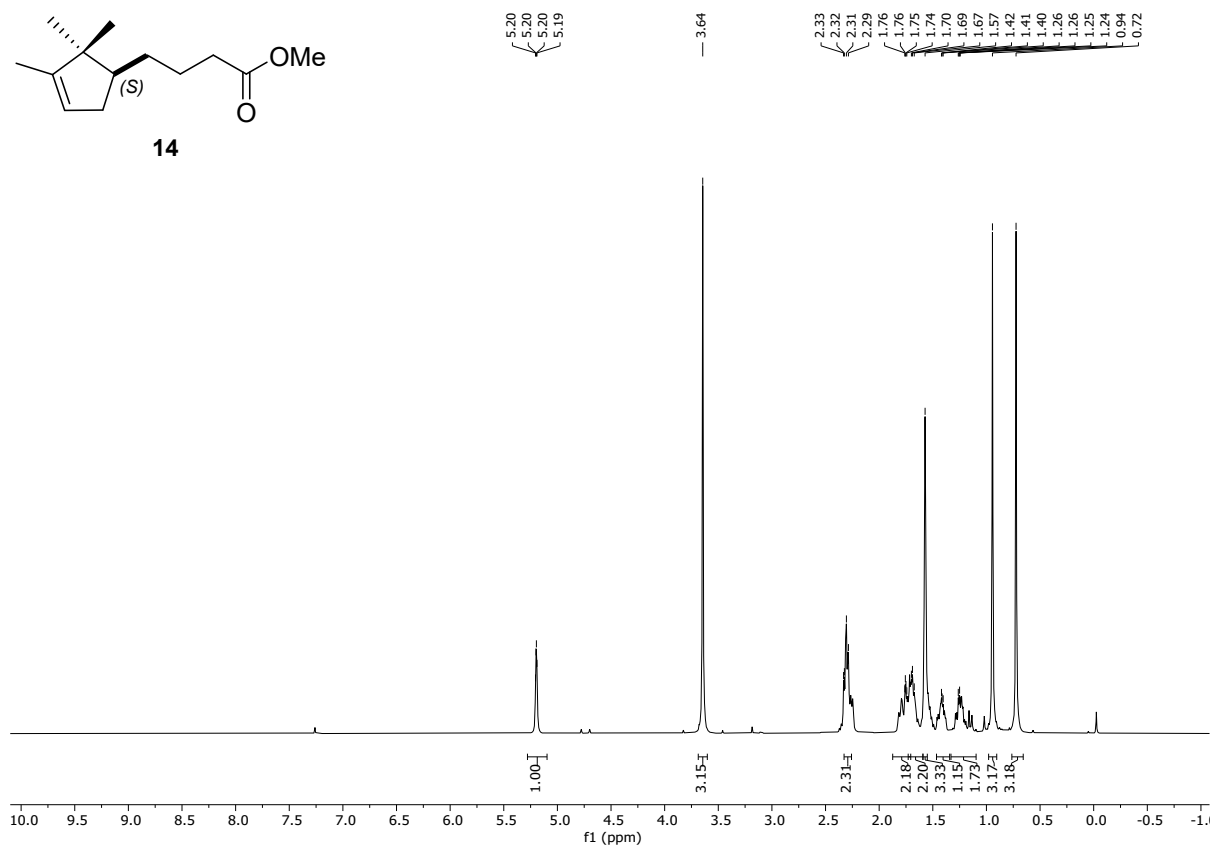 $^{13}\text{C}\{^1\text{H}\}$ -NMR ( $\text{CDCl}_3$ , 101 MHz)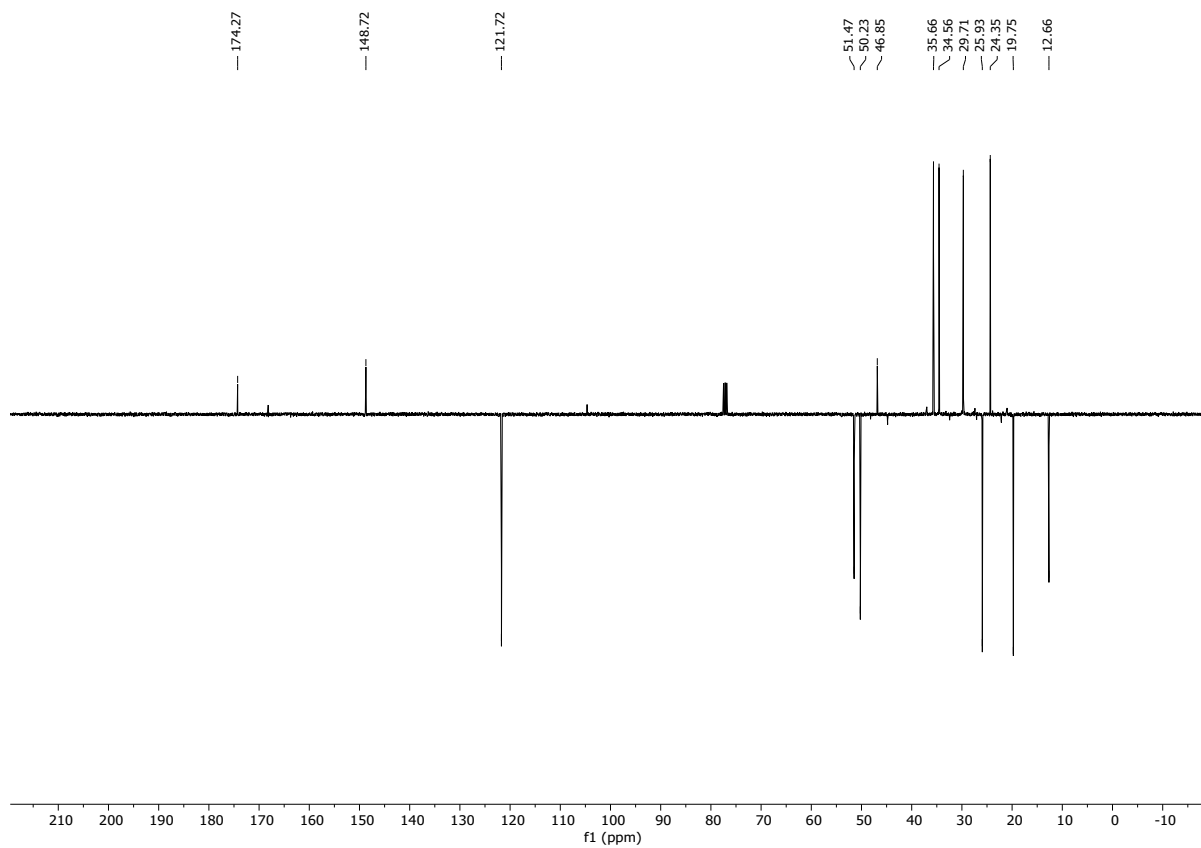

15

 $^1\text{H-NMR}$  ( $\text{CDCl}_3$ , 400 MHz)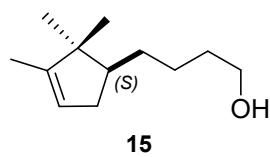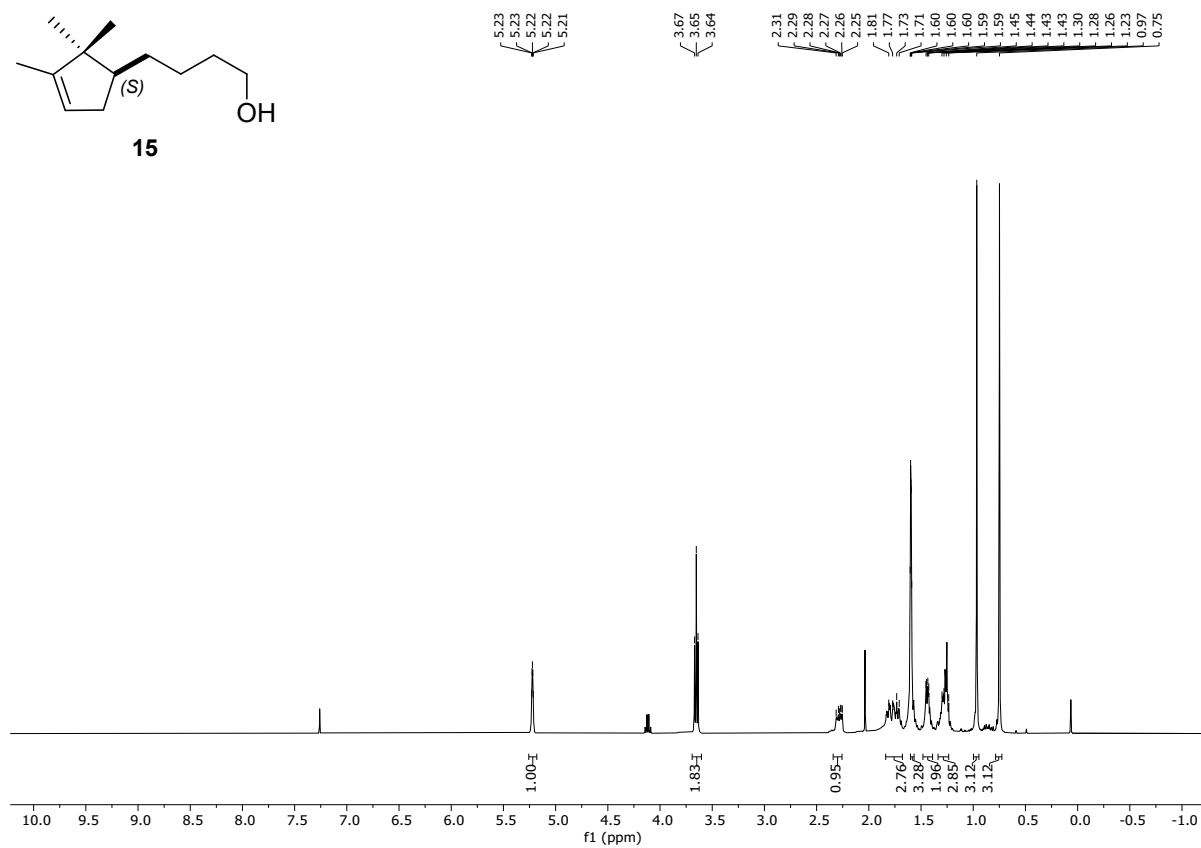 $^{13}\text{C}\{^1\text{H}\}$ -NMR ( $\text{CDCl}_3$ , 101 MHz)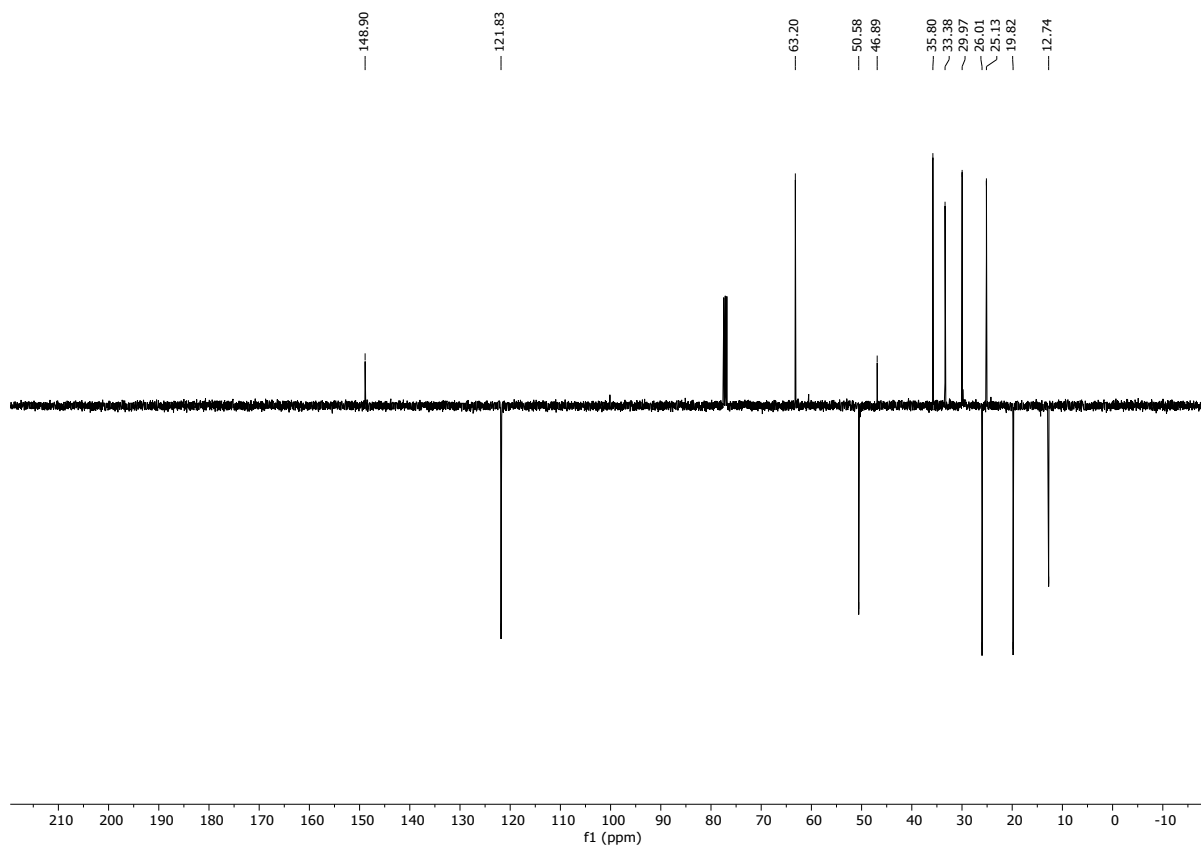

16

 $^1\text{H-NMR}$  ( $\text{CDCl}_3$ , 400 MHz)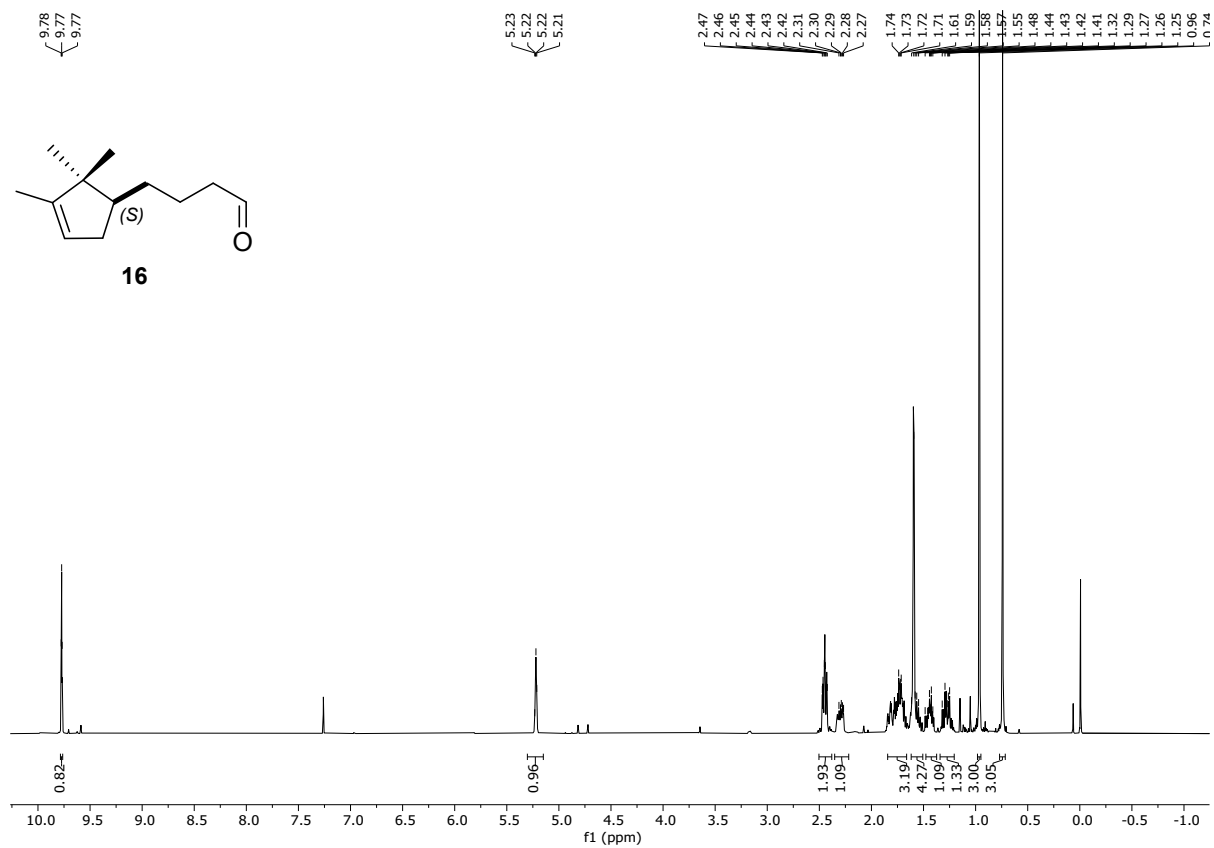 $^{13}\text{C}\{^1\text{H}\}$ -NMR ( $\text{CDCl}_3$ , 101 MHz)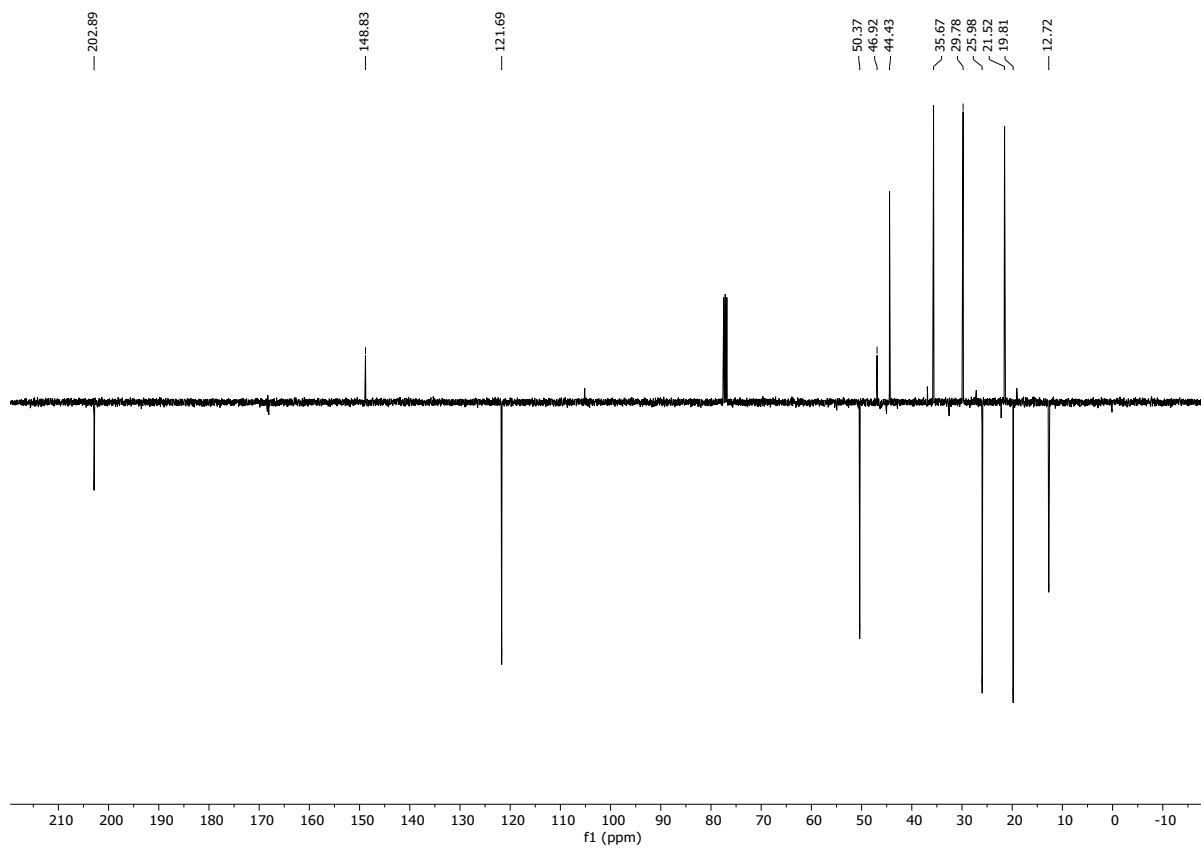

## 5a

 $^1\text{H-NMR}$  ( $\text{CDCl}_3$ , 400 MHz)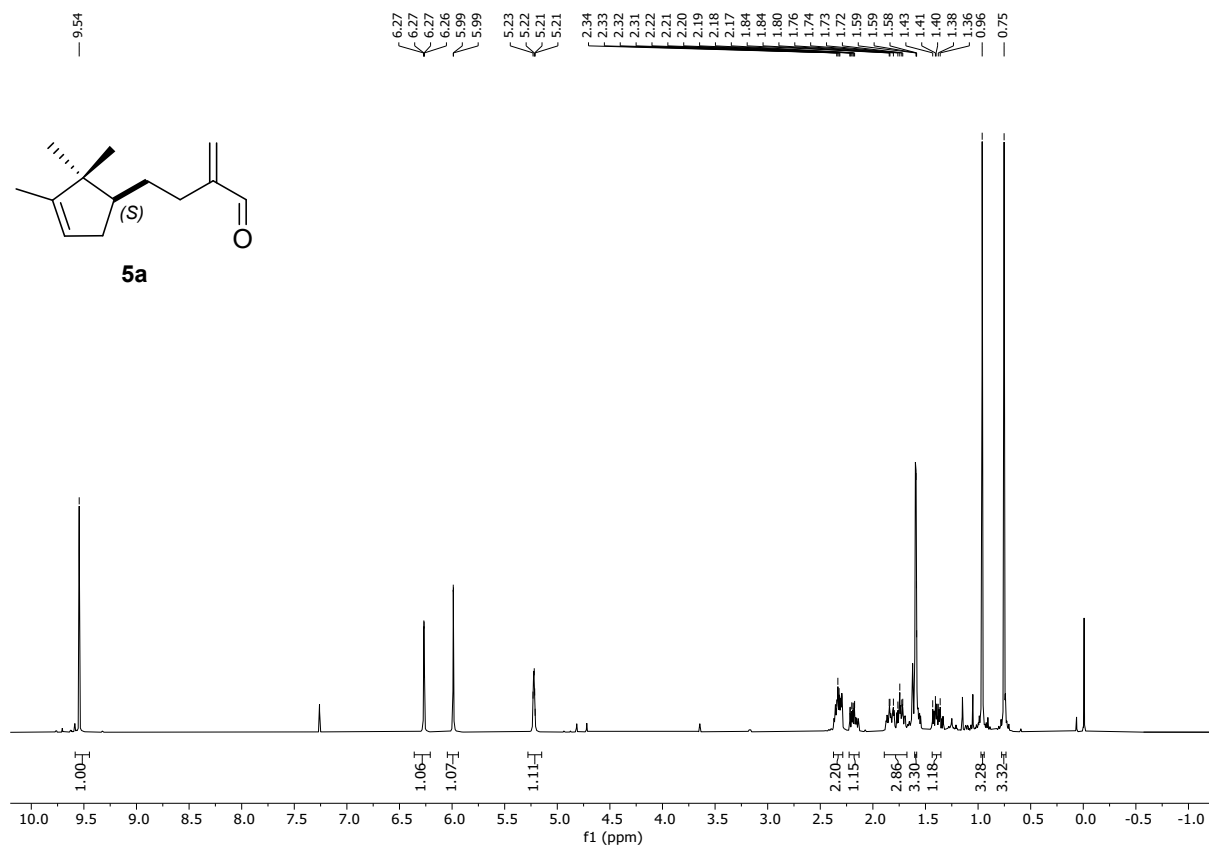 $^{13}\text{C}\{^1\text{H}\}$ -NMR ( $\text{CDCl}_3$ , 101 MHz)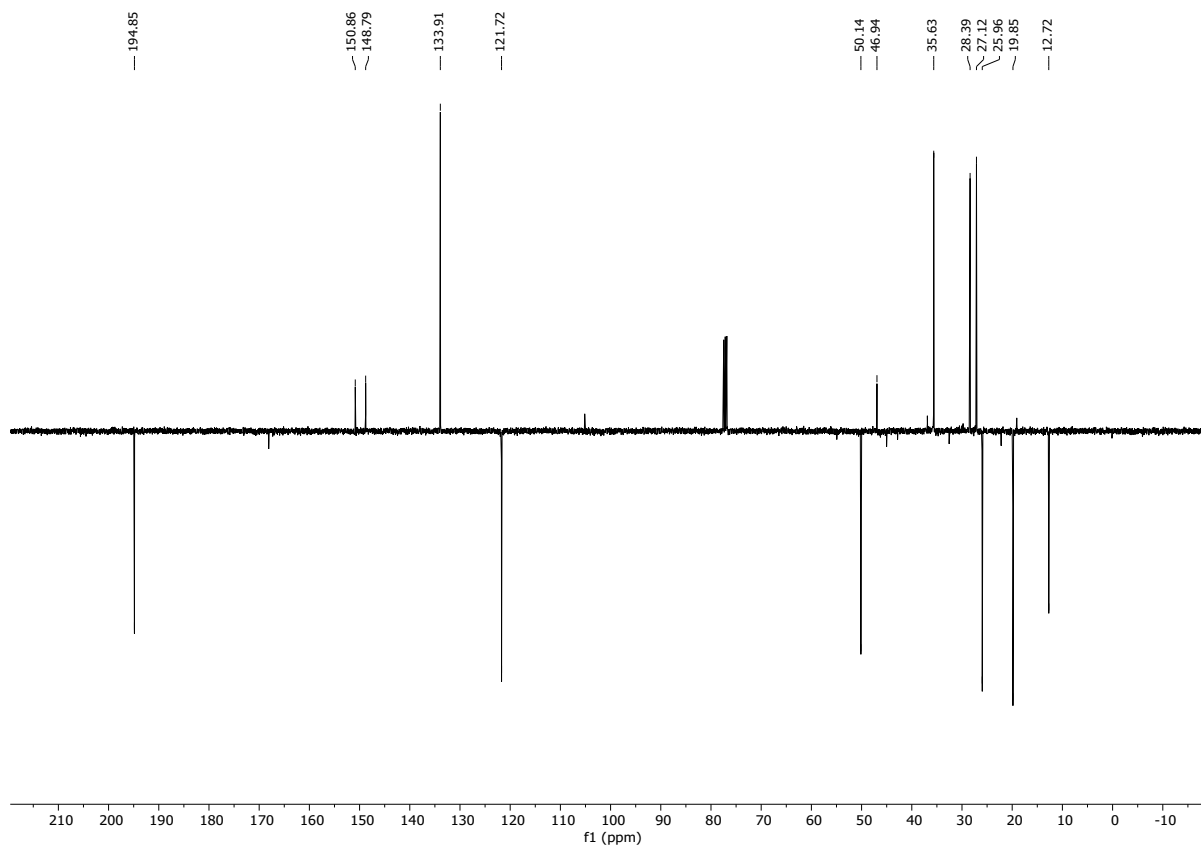

17

 $^1\text{H-NMR}$  ( $\text{CDCl}_3$ , 400 MHz)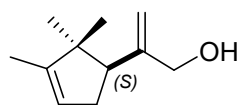

17

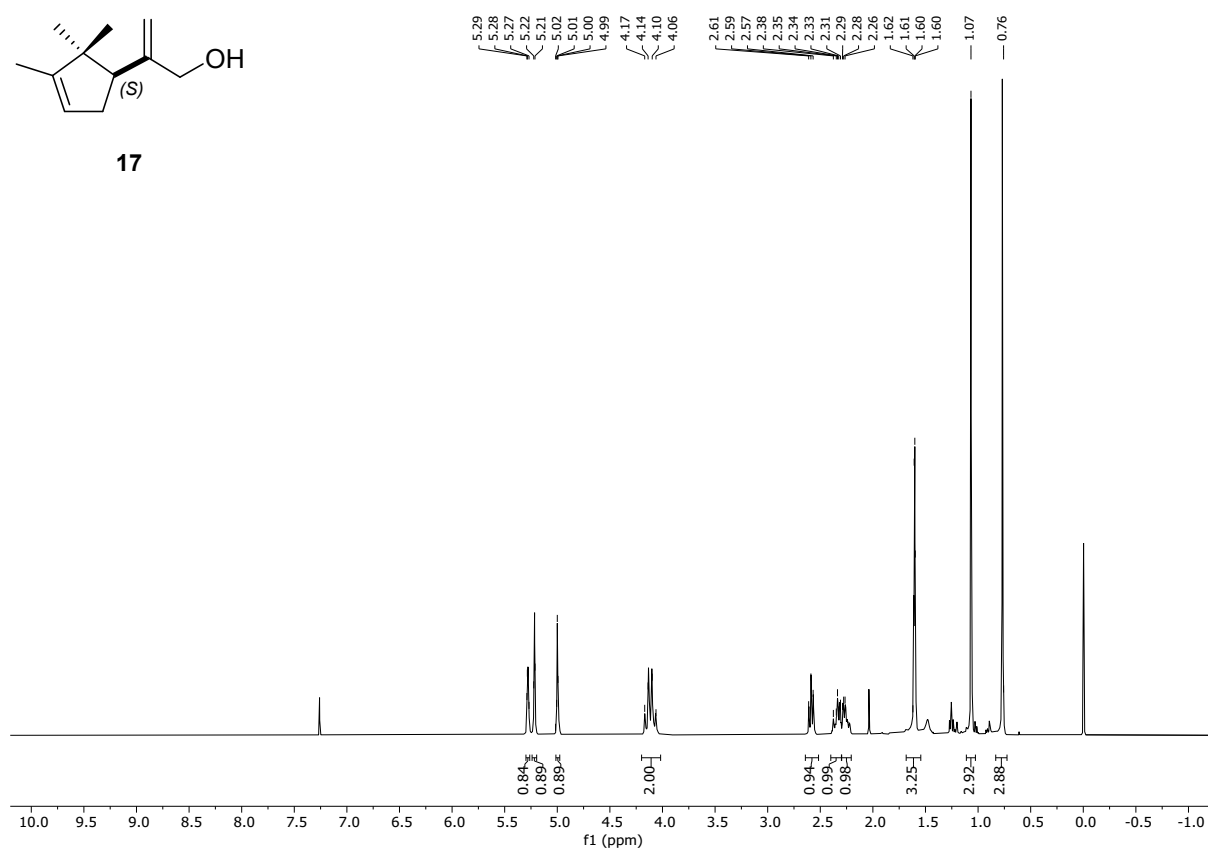 $^{13}\text{C}\{^1\text{H}\}$ -NMR ( $\text{CDCl}_3$ , 101 MHz)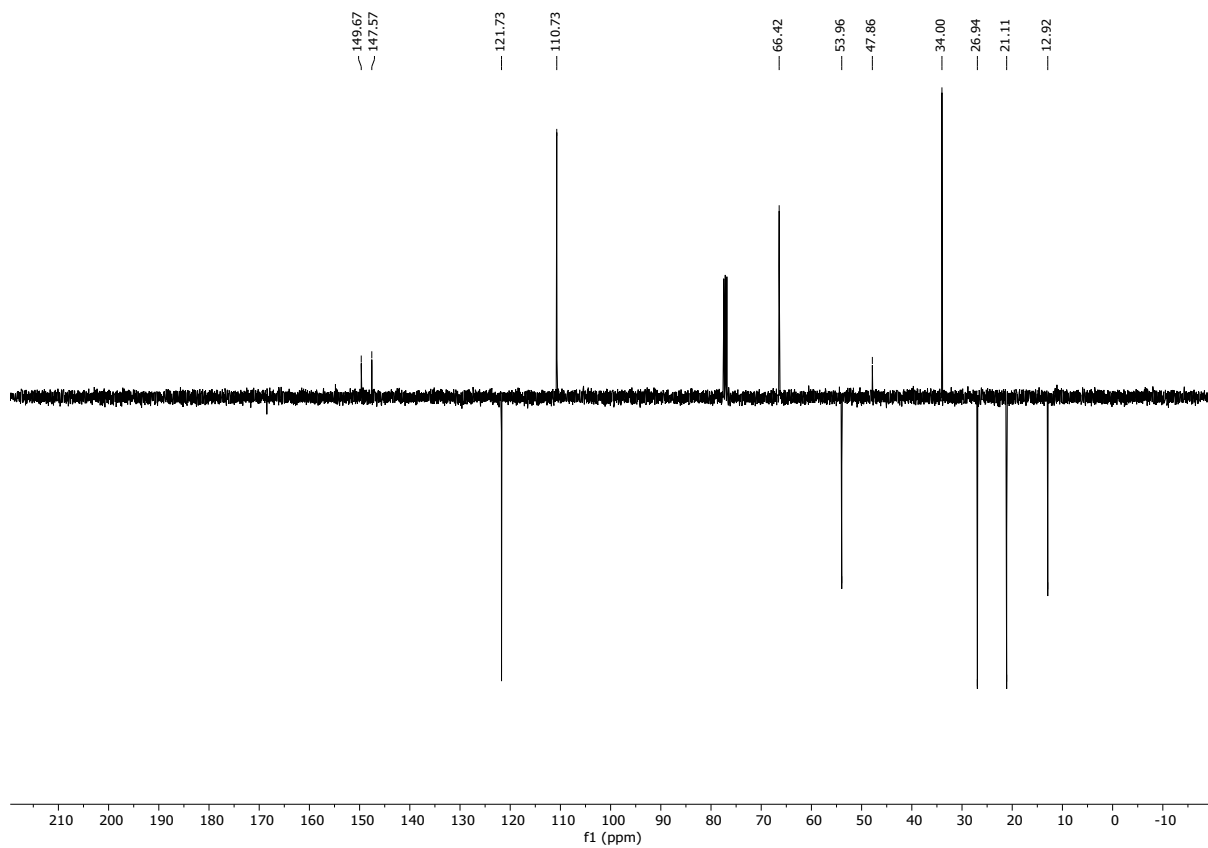

18

 $^1\text{H-NMR}$  ( $\text{CDCl}_3$ , 400 MHz)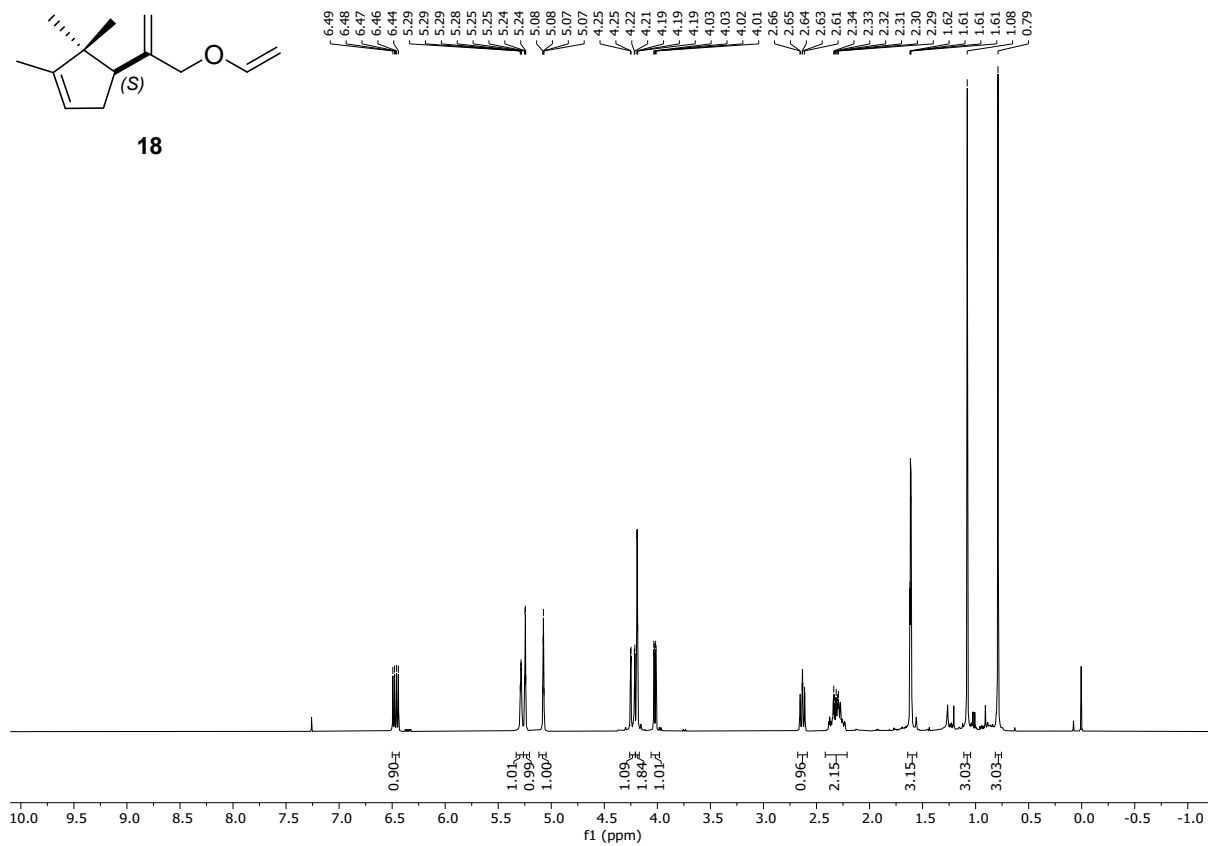 $^{13}\text{C}\{^1\text{H}\}$ -NMR ( $\text{CDCl}_3$ , 101 MHz)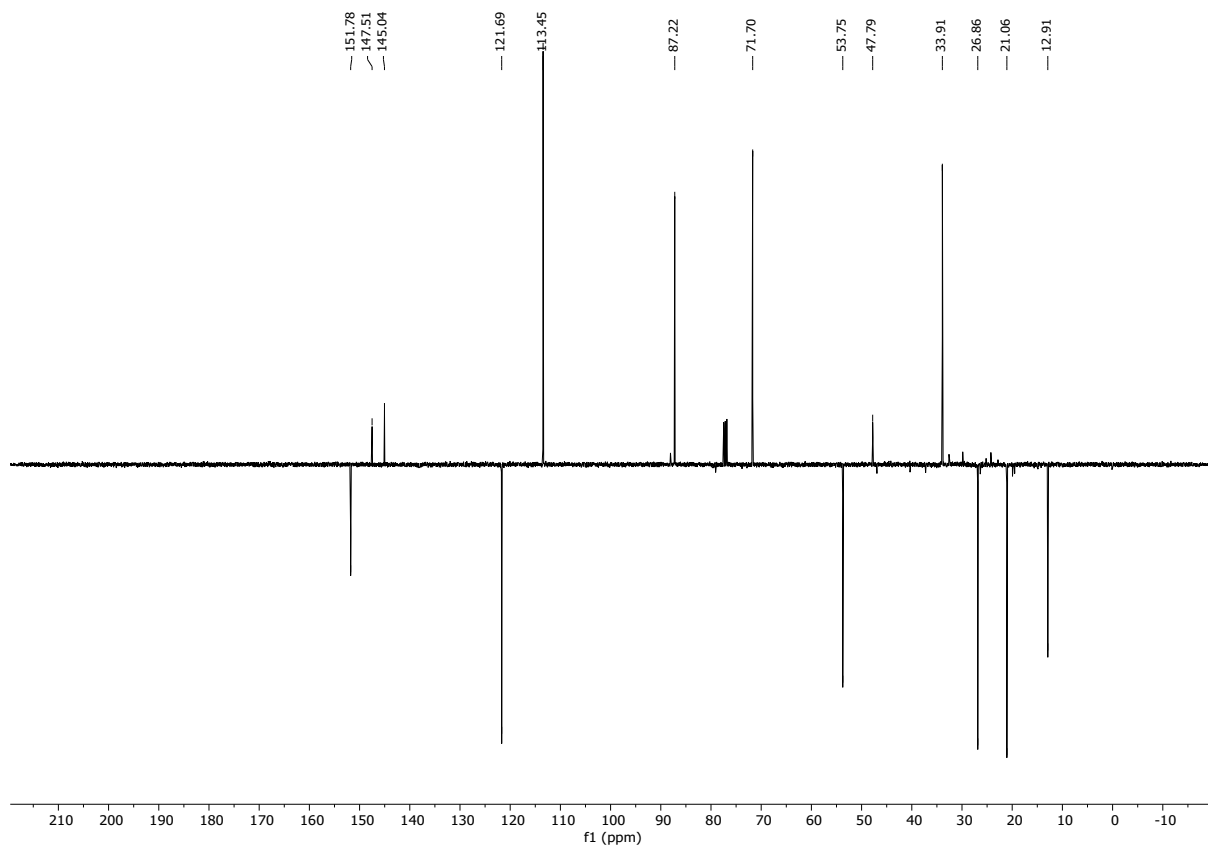



19

 $^1\text{H-NMR}$  ( $\text{CDCl}_3$ , 400 MHz)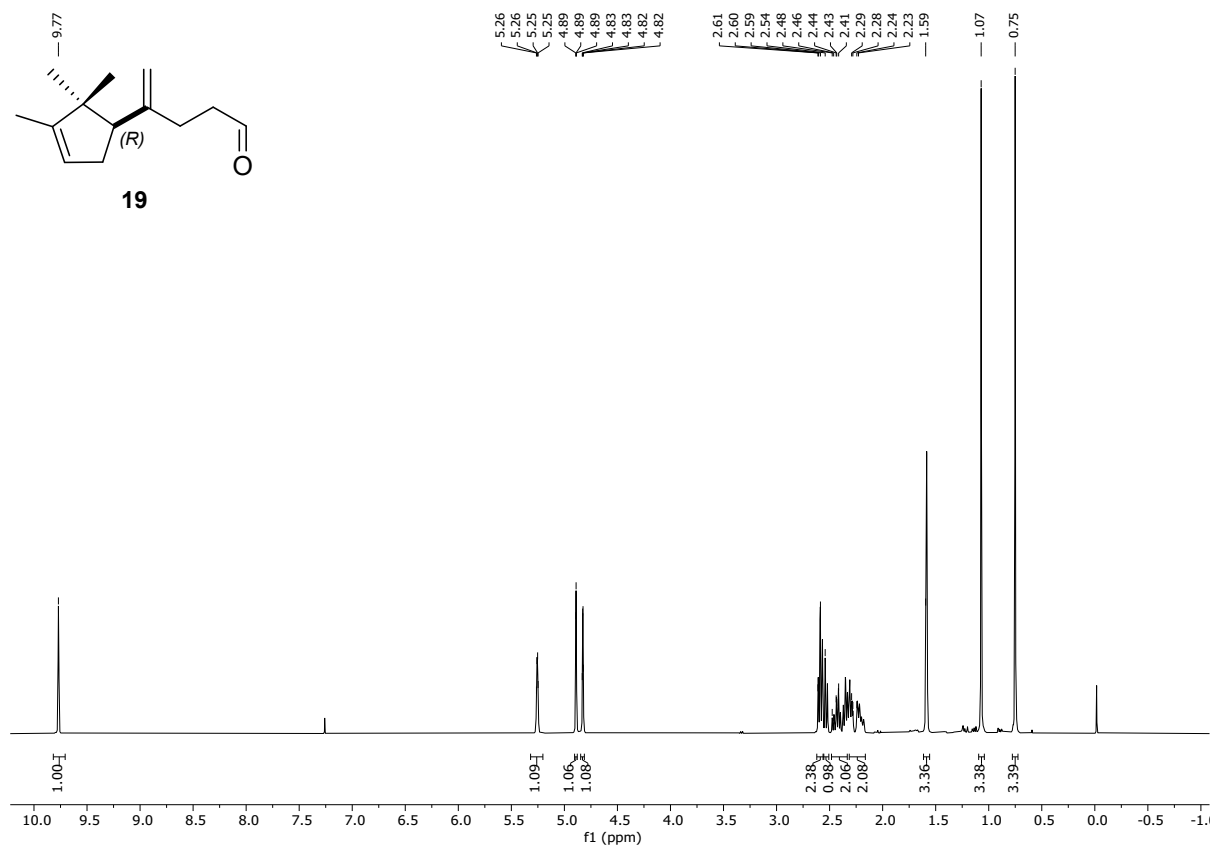 $^{13}\text{C}\{^1\text{H}\}$ -NMR ( $\text{CDCl}_3$ , 101 MHz)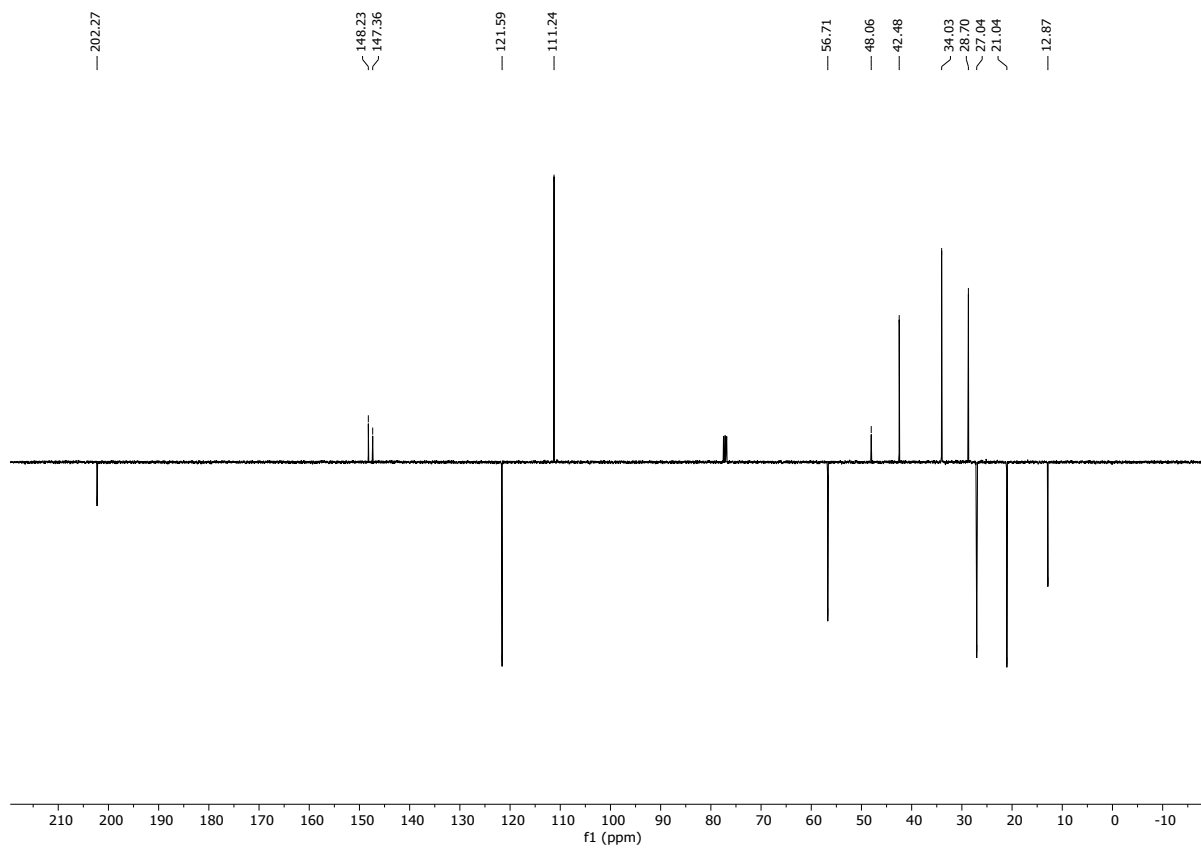

## 5b

 $^1\text{H-NMR}$  ( $\text{CDCl}_3$ , 400 MHz)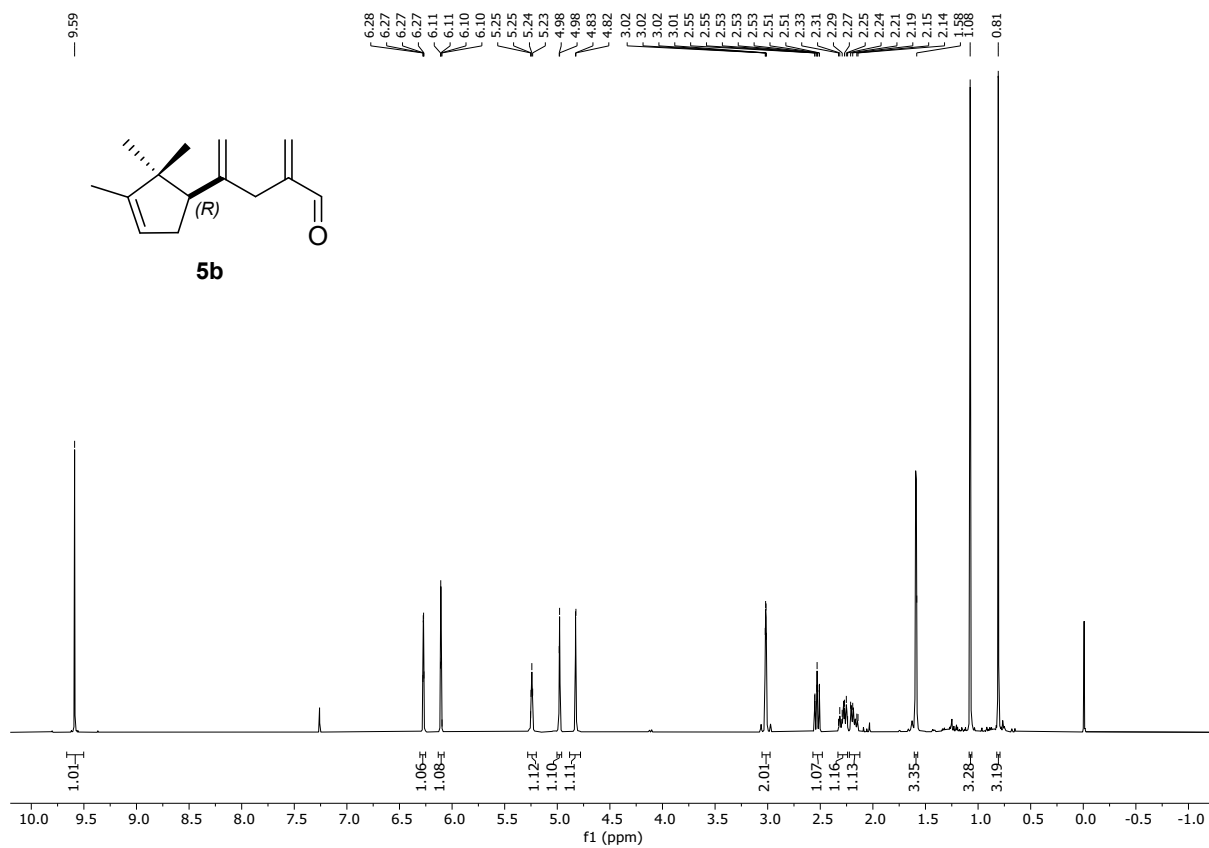 $^{13}\text{C}\{^1\text{H}\}$ -NMR ( $\text{CDCl}_3$ , 101 MHz)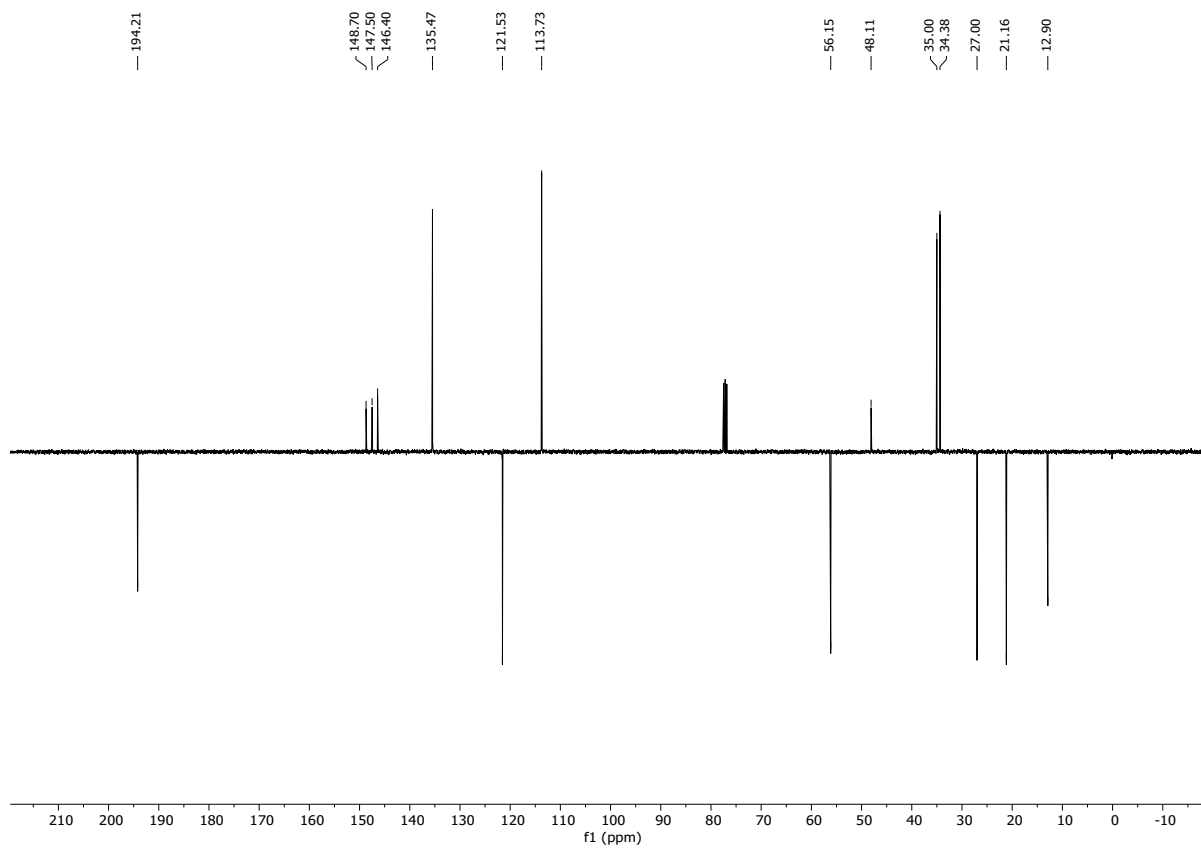

20

 $^1\text{H-NMR}$  ( $\text{CDCl}_3$ , 400 MHz)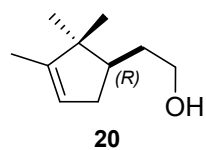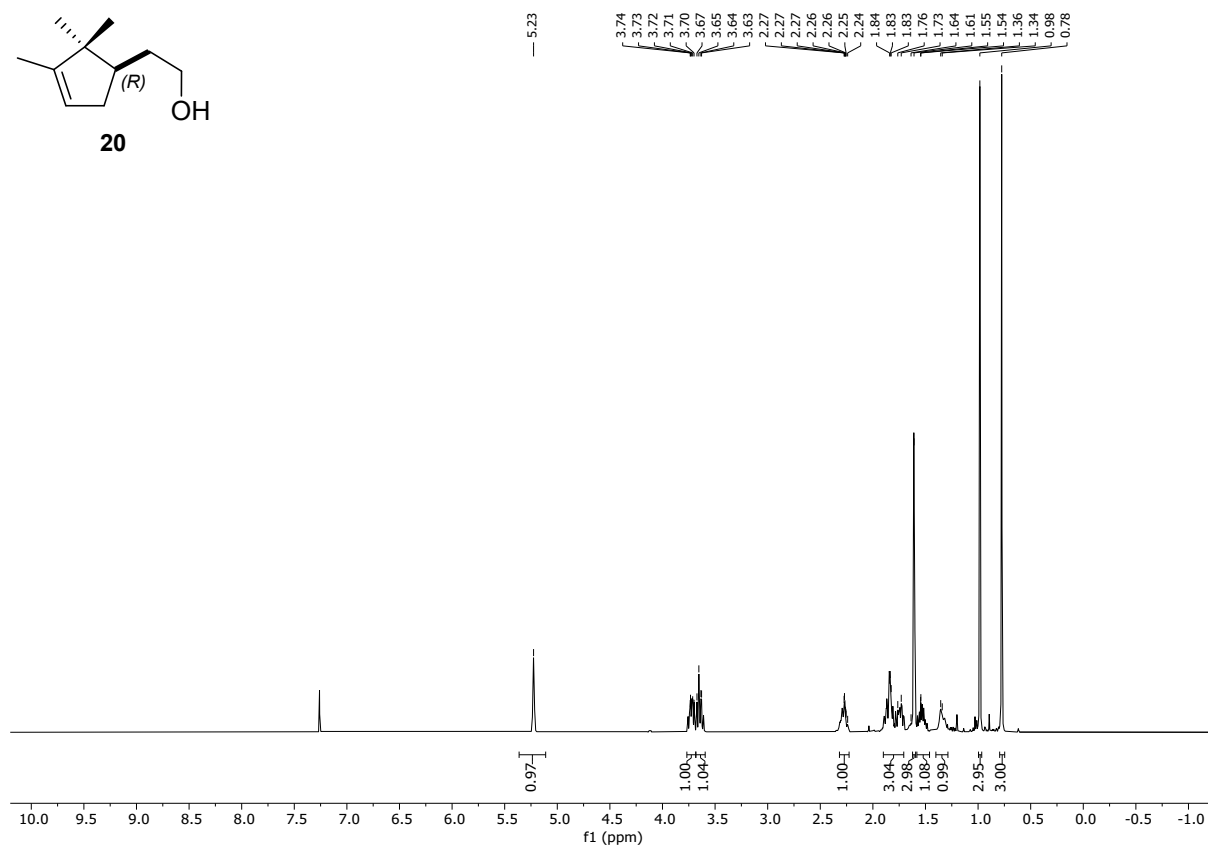 $^{13}\text{C}\{^1\text{H}\}$ -NMR ( $\text{CDCl}_3$ , 101 MHz)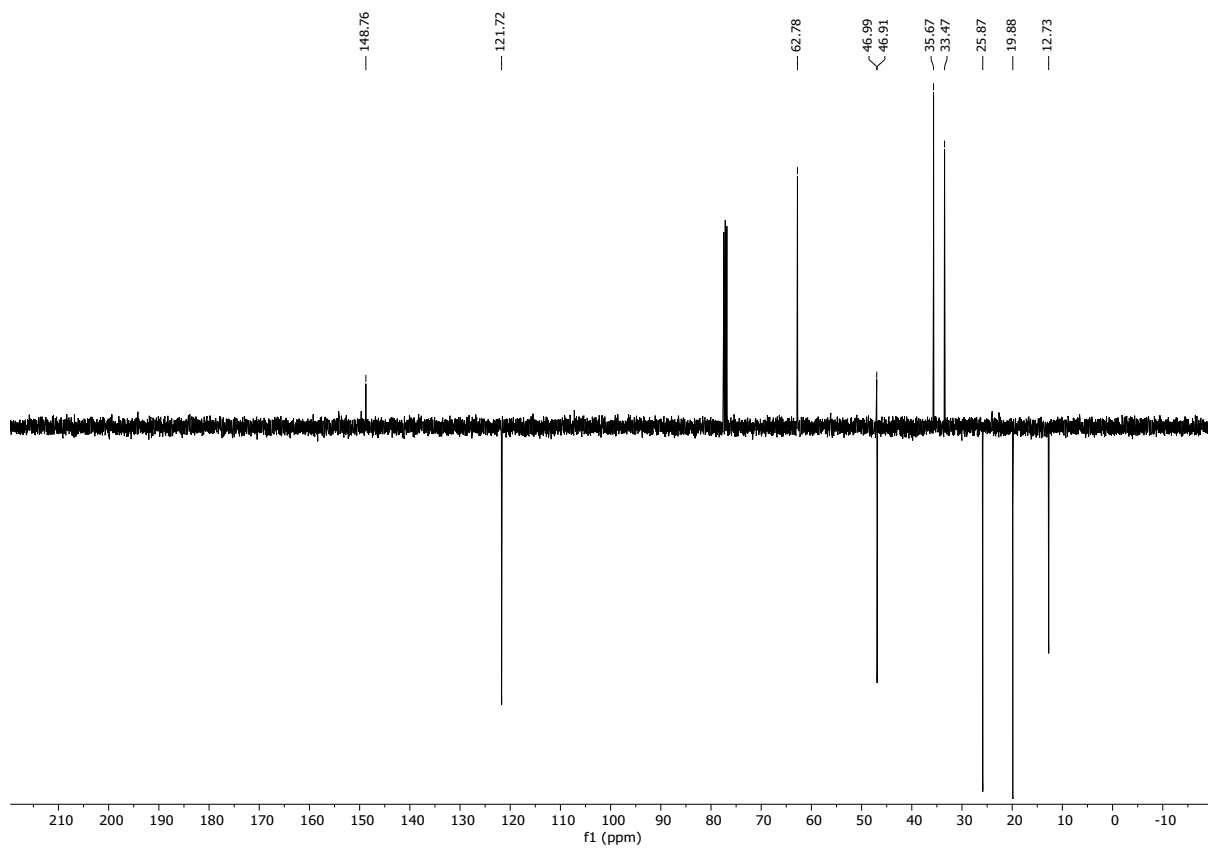

21

 $^1\text{H-NMR}$  ( $\text{CDCl}_3$ , 400 MHz)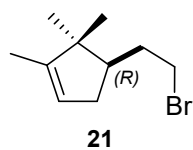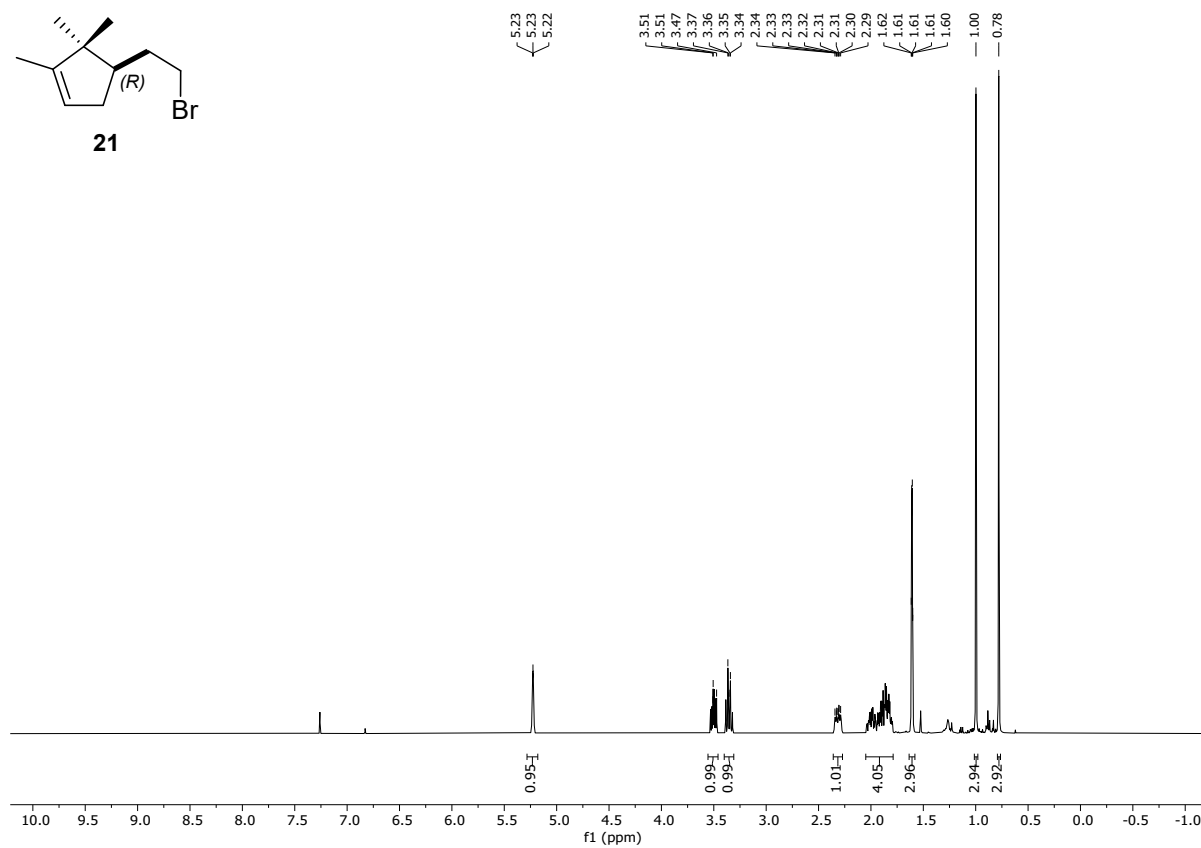 $^{13}\text{C}\{^1\text{H}\}$ -NMR ( $\text{CDCl}_3$ , 101 MHz)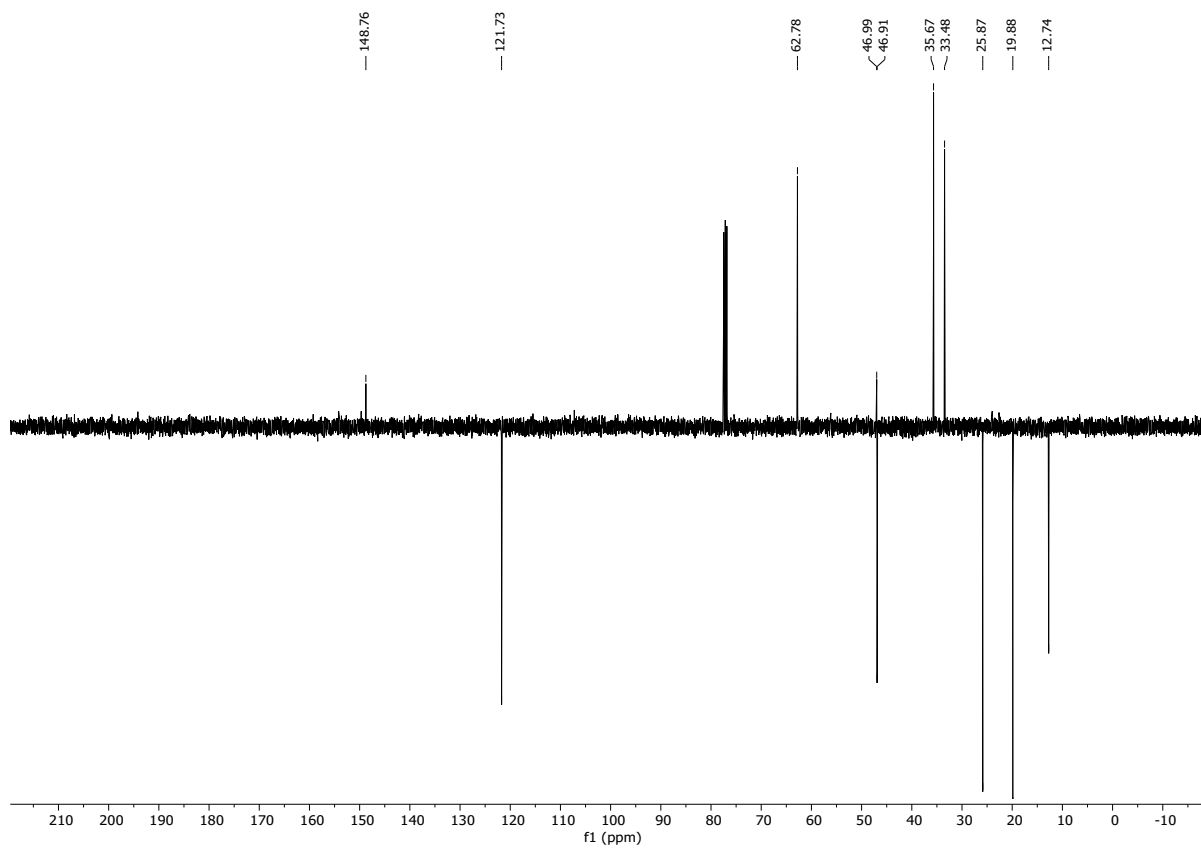

22

 $^1\text{H-NMR}$  ( $\text{CDCl}_3$ , 400 MHz)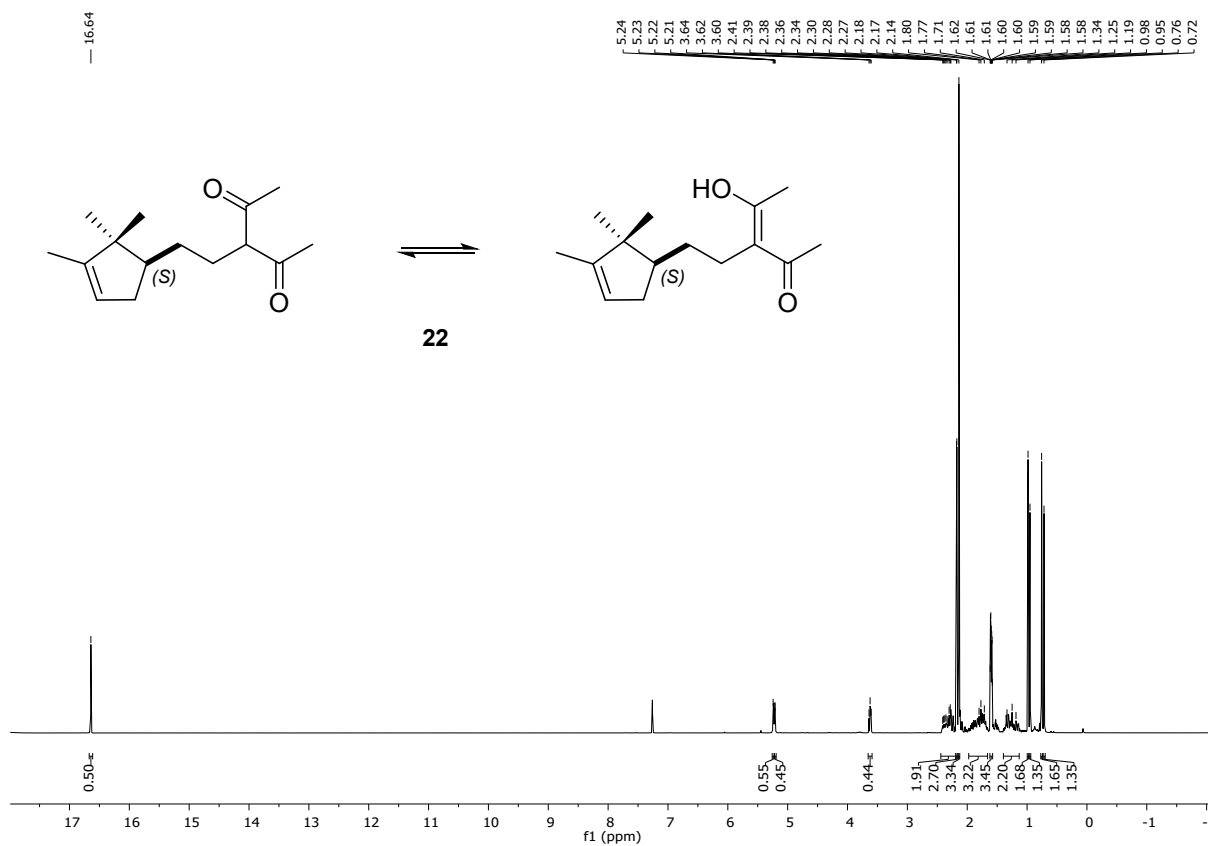 $^{13}\text{C}\{^1\text{H}\}$ -NMR ( $\text{CDCl}_3$ , 101 MHz)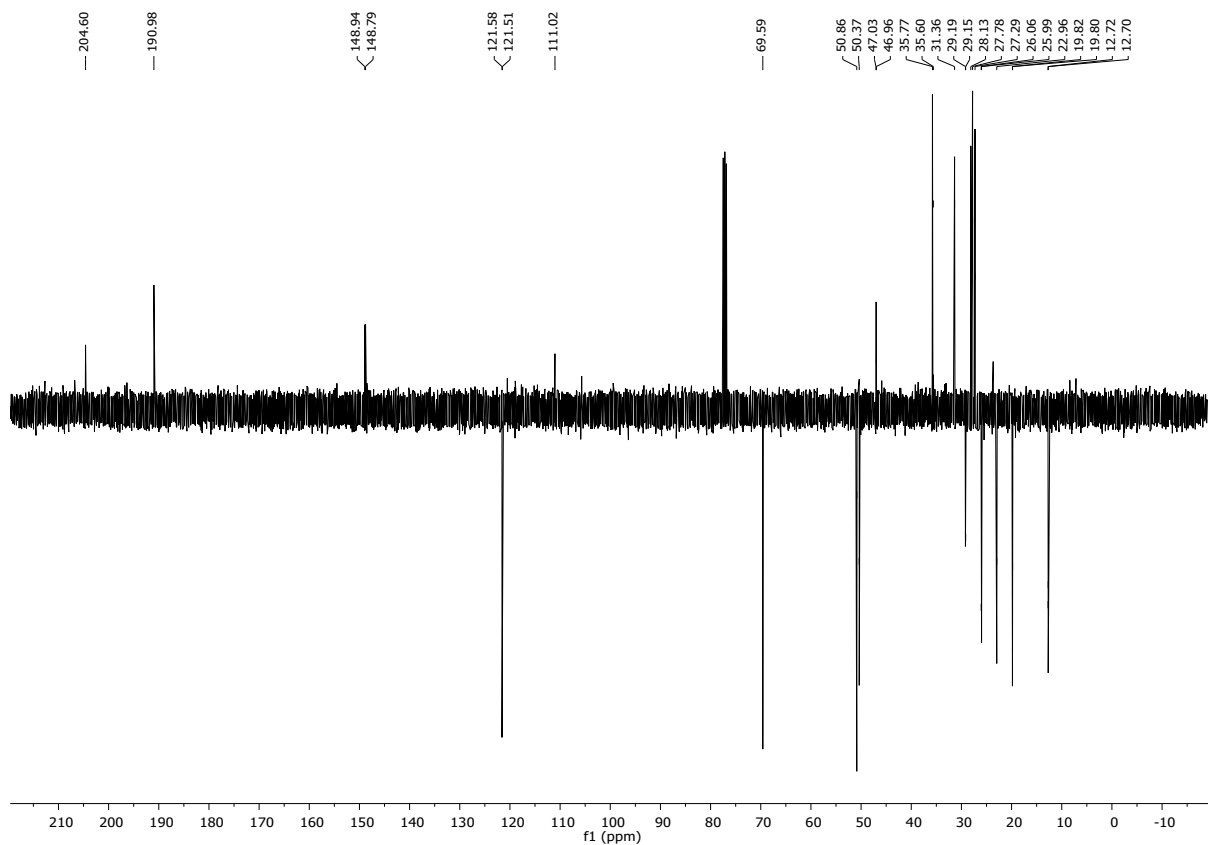

23

 $^{13}\text{C}\{^1\text{H}\}$ -NMR ( $\text{CDCl}_3$ , 101 MHz)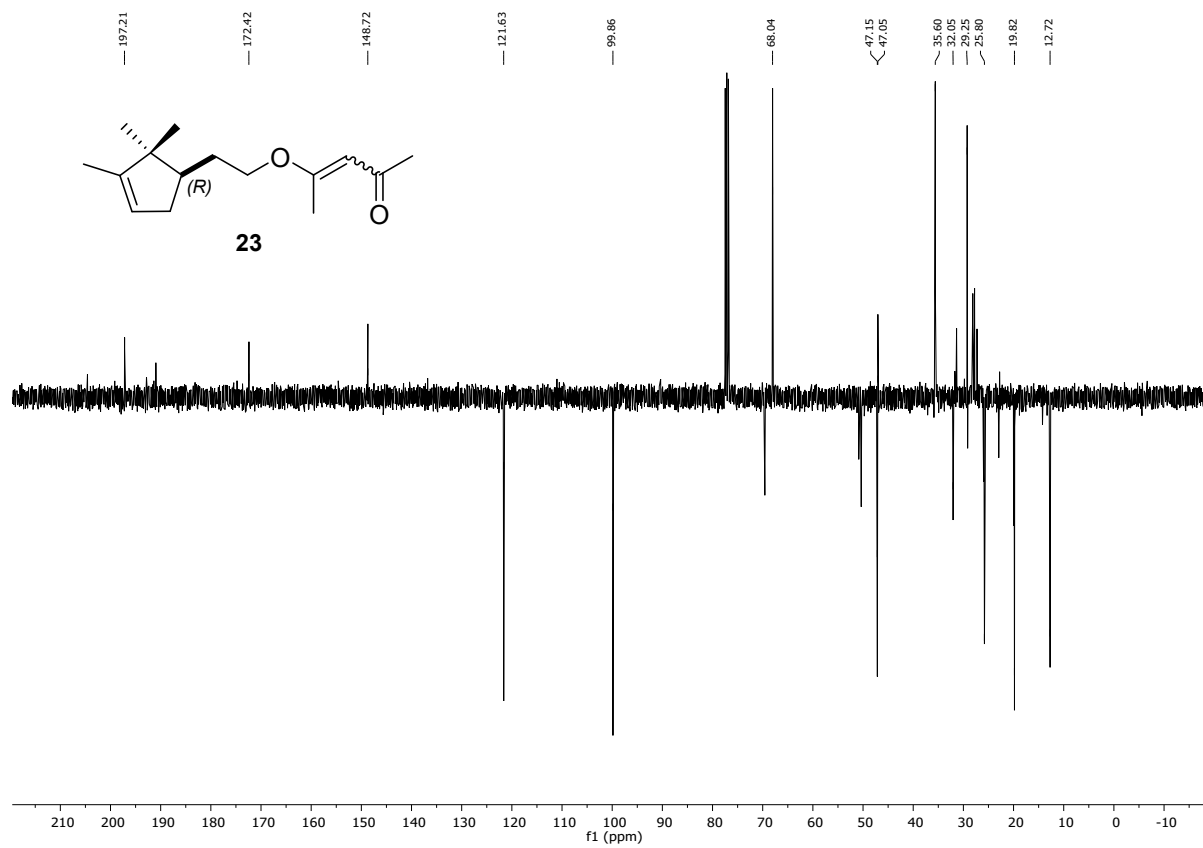

8

 $^1\text{H-NMR}$  ( $\text{CDCl}_3$ , 400 MHz)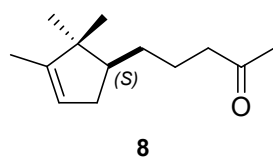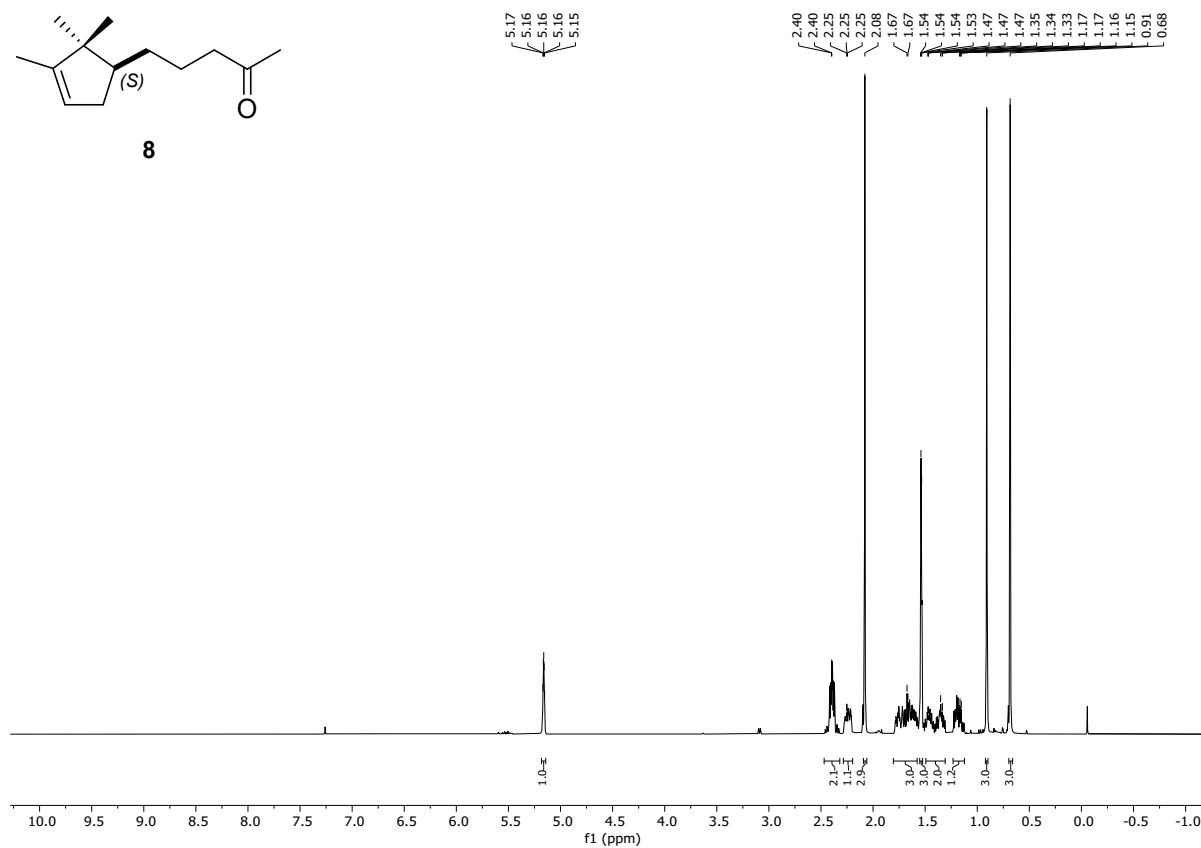 $^{13}\text{C}\{^1\text{H}\}$ -NMR ( $\text{CDCl}_3$ , 101 MHz)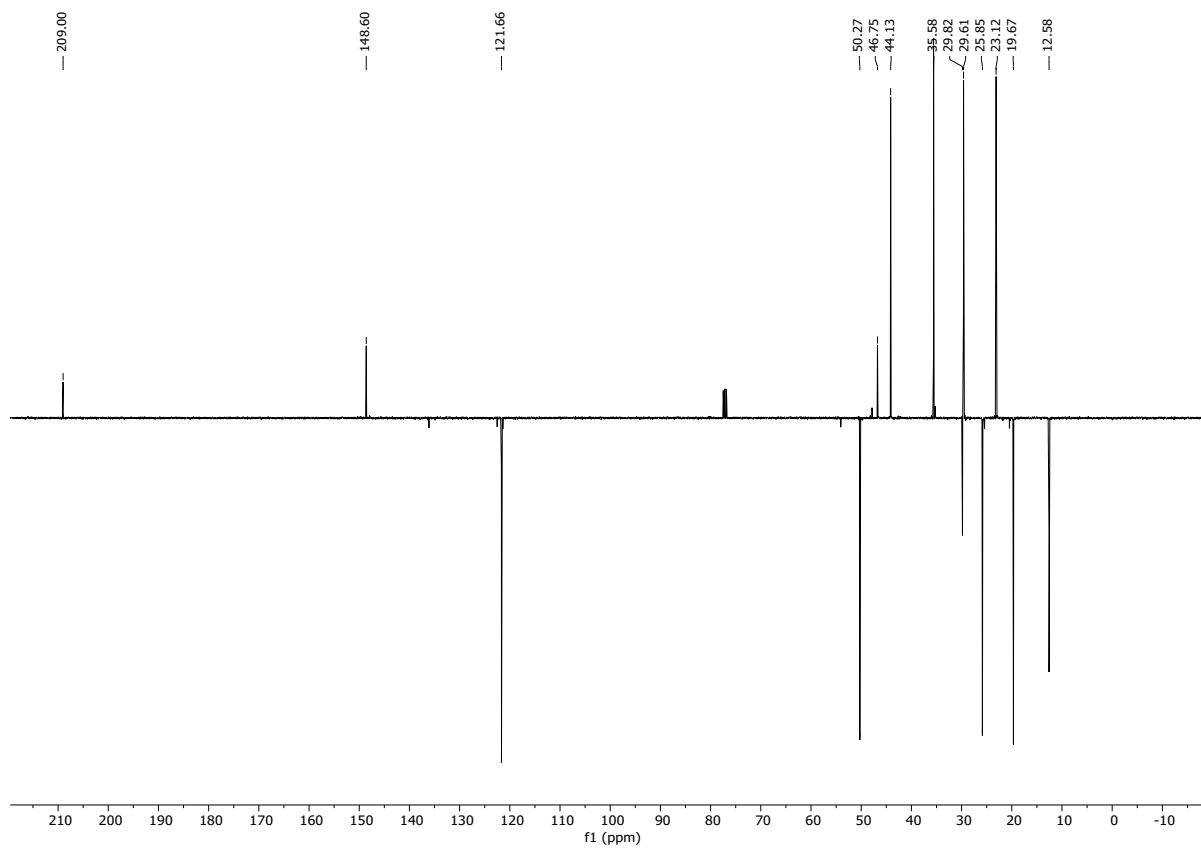

## 5c

 $^1\text{H-NMR}$  ( $\text{CDCl}_3$ , 400 MHz)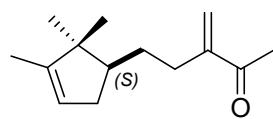

5c

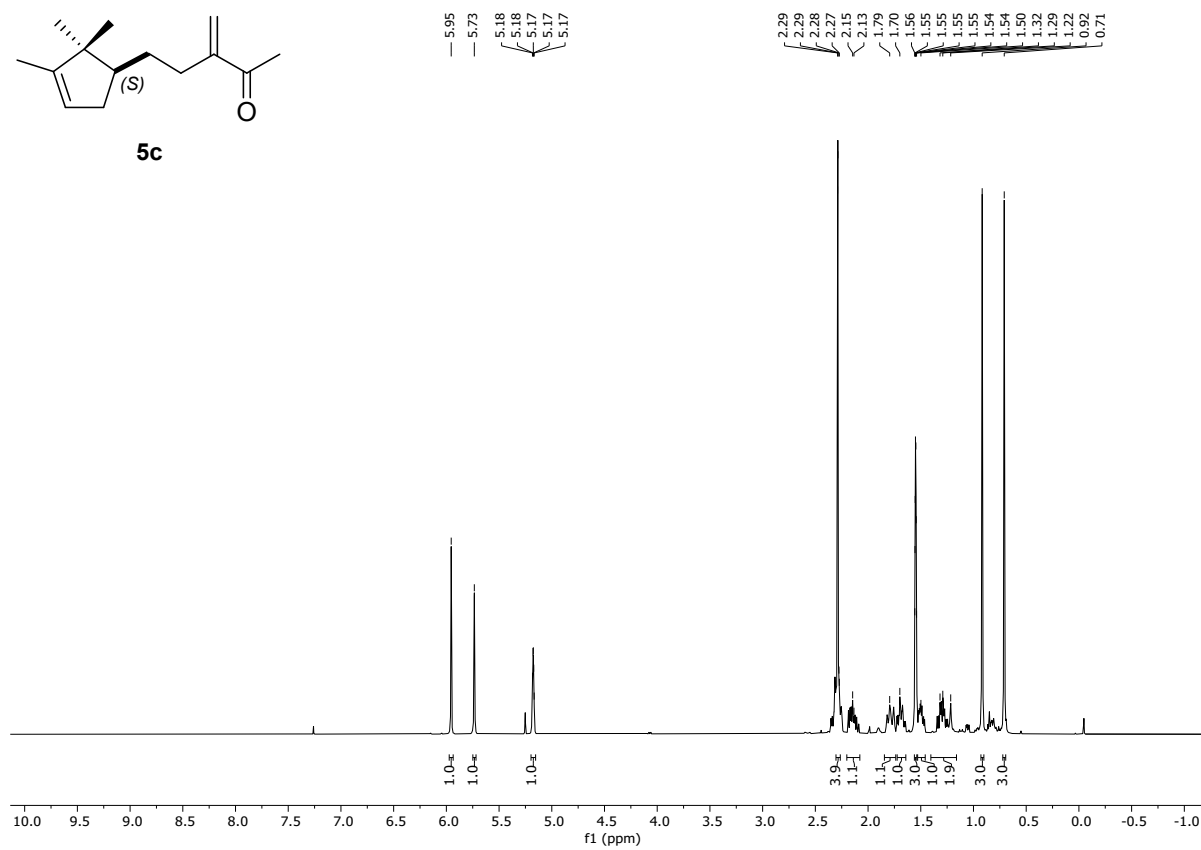 $^{13}\text{C}\{^1\text{H}\}$ -NMR ( $\text{CDCl}_3$ , 101 MHz)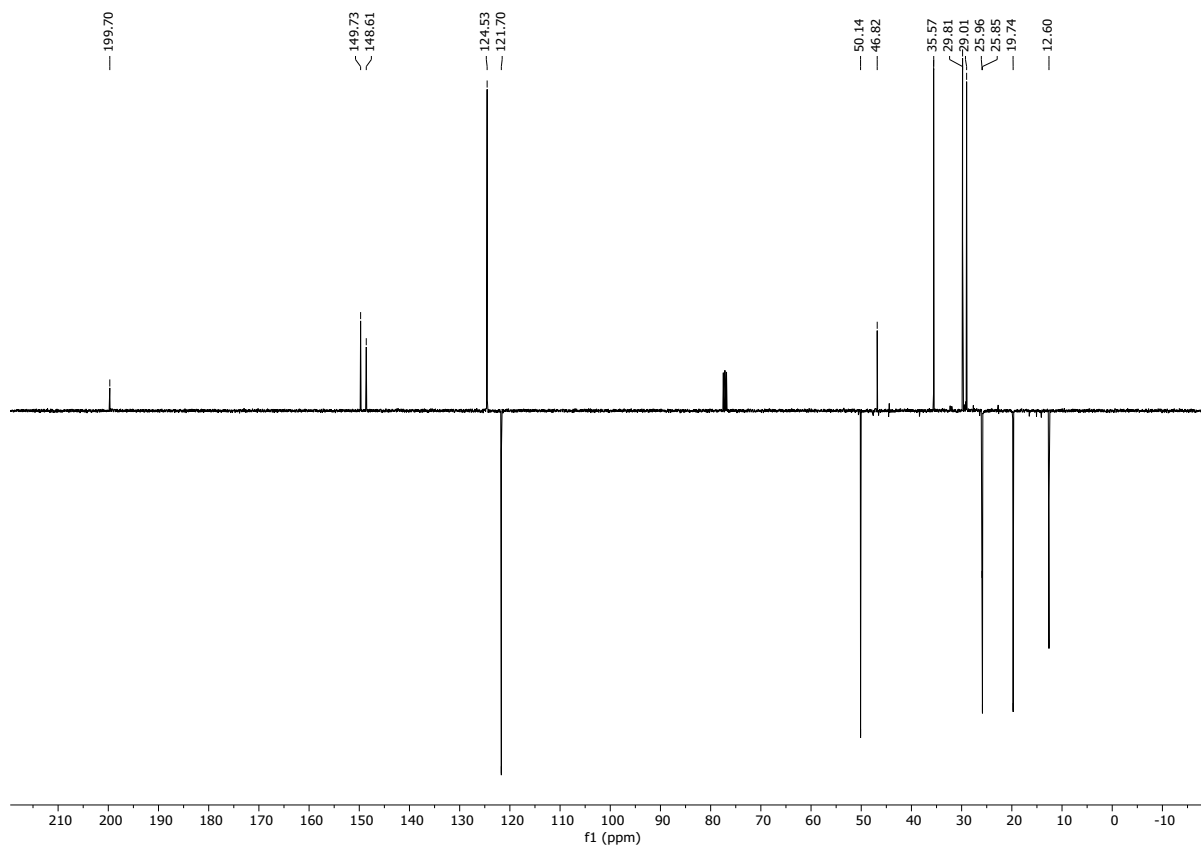



24

 $^1\text{H-NMR}$  ( $\text{CDCl}_3$ , 400 MHz)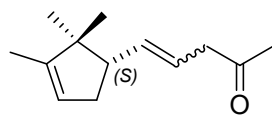**24**, *E/Z* = 23:77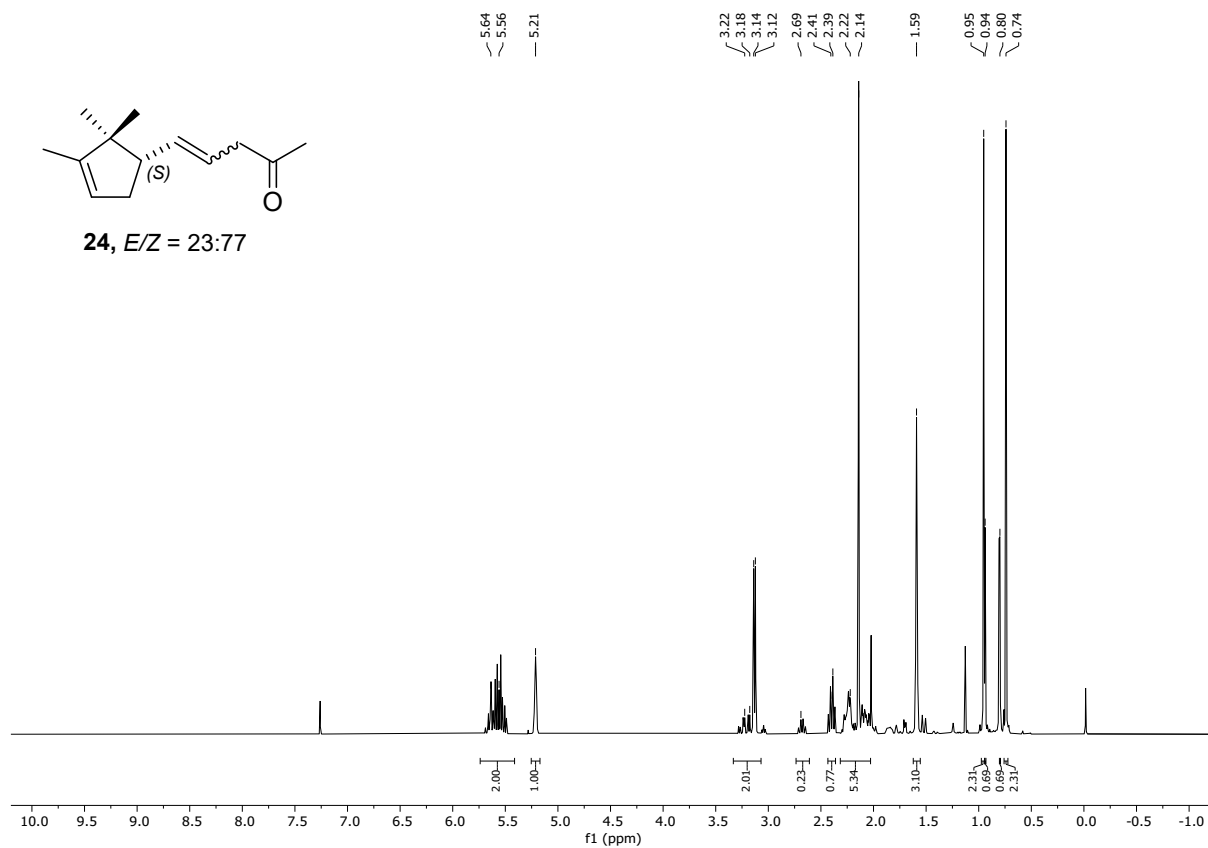 $^{13}\text{C}\{^1\text{H}\}$ -NMR ( $\text{CDCl}_3$ , 101 MHz)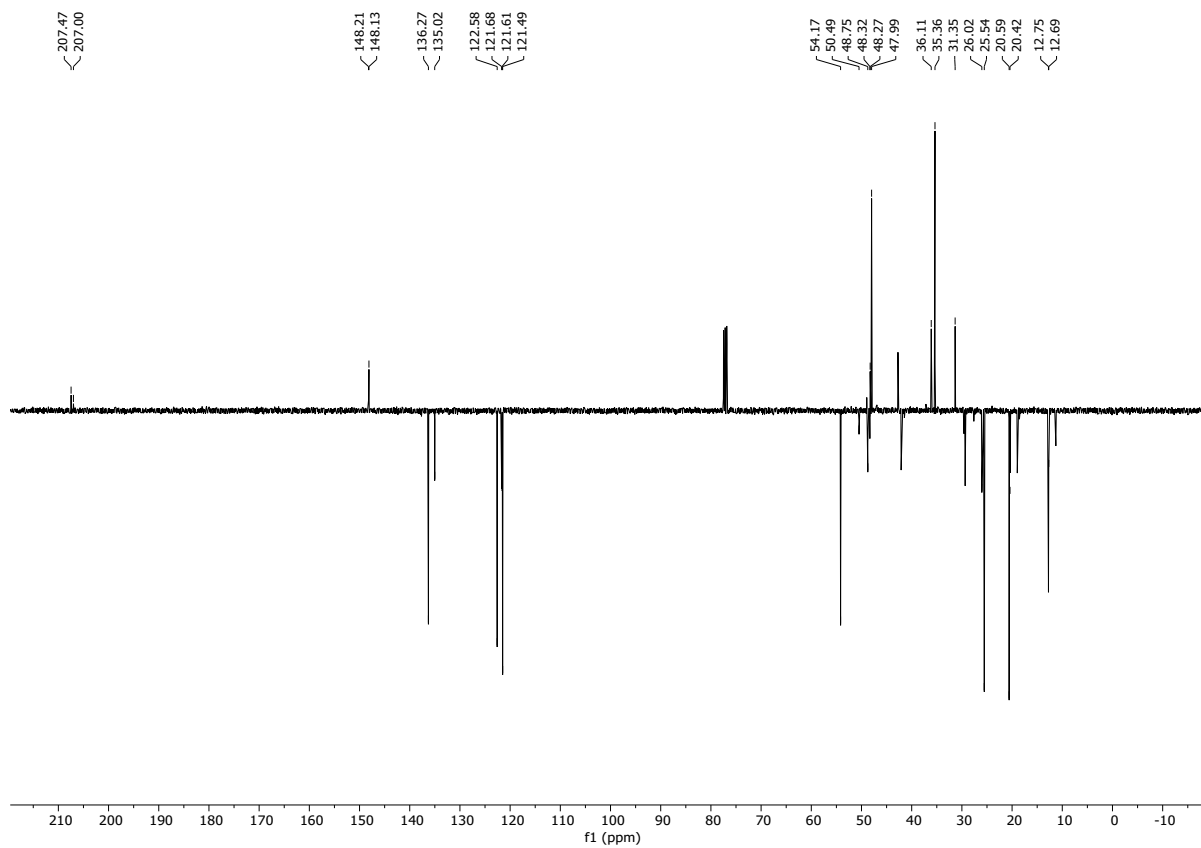

## 5d

 $^1\text{H-NMR}$  ( $\text{CDCl}_3$ , 400 MHz)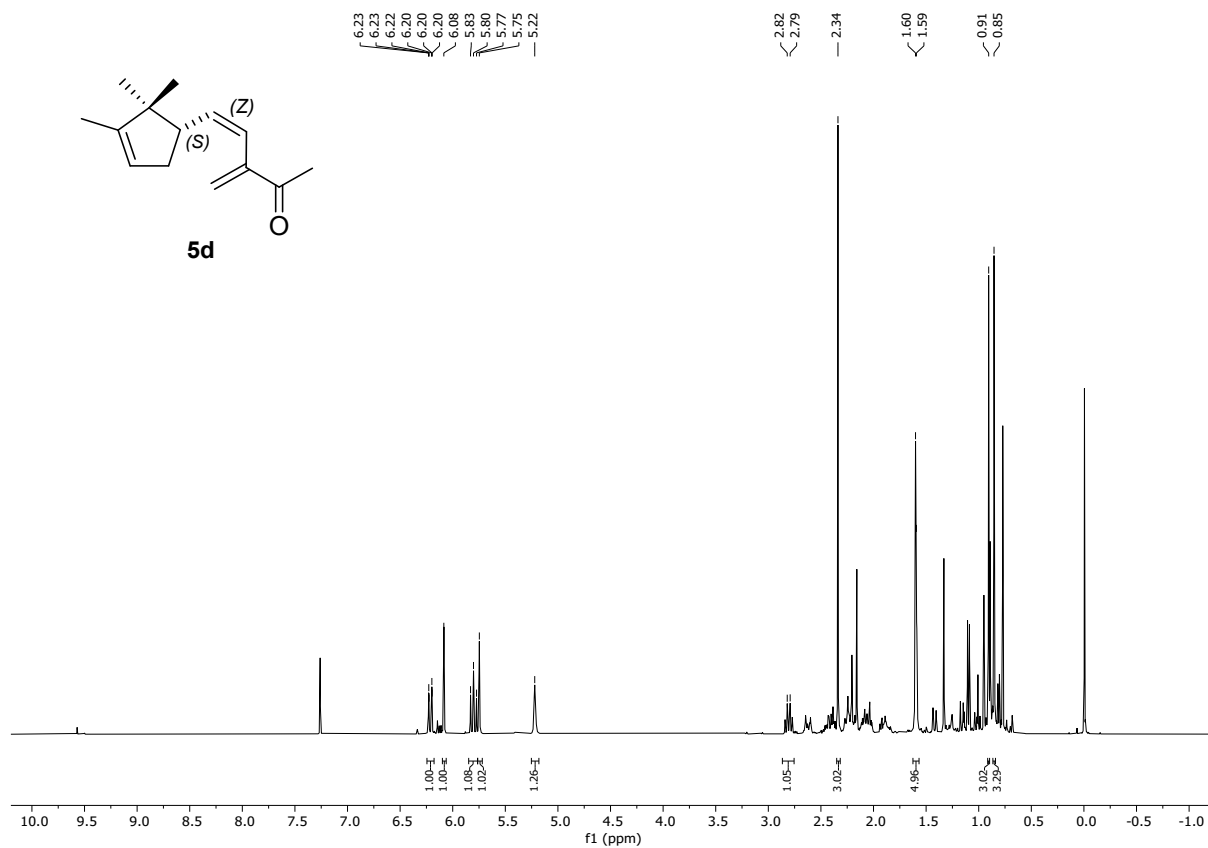 $^{13}\text{C}\{^1\text{H}\}$ -NMR ( $\text{CDCl}_3$ , 101 MHz)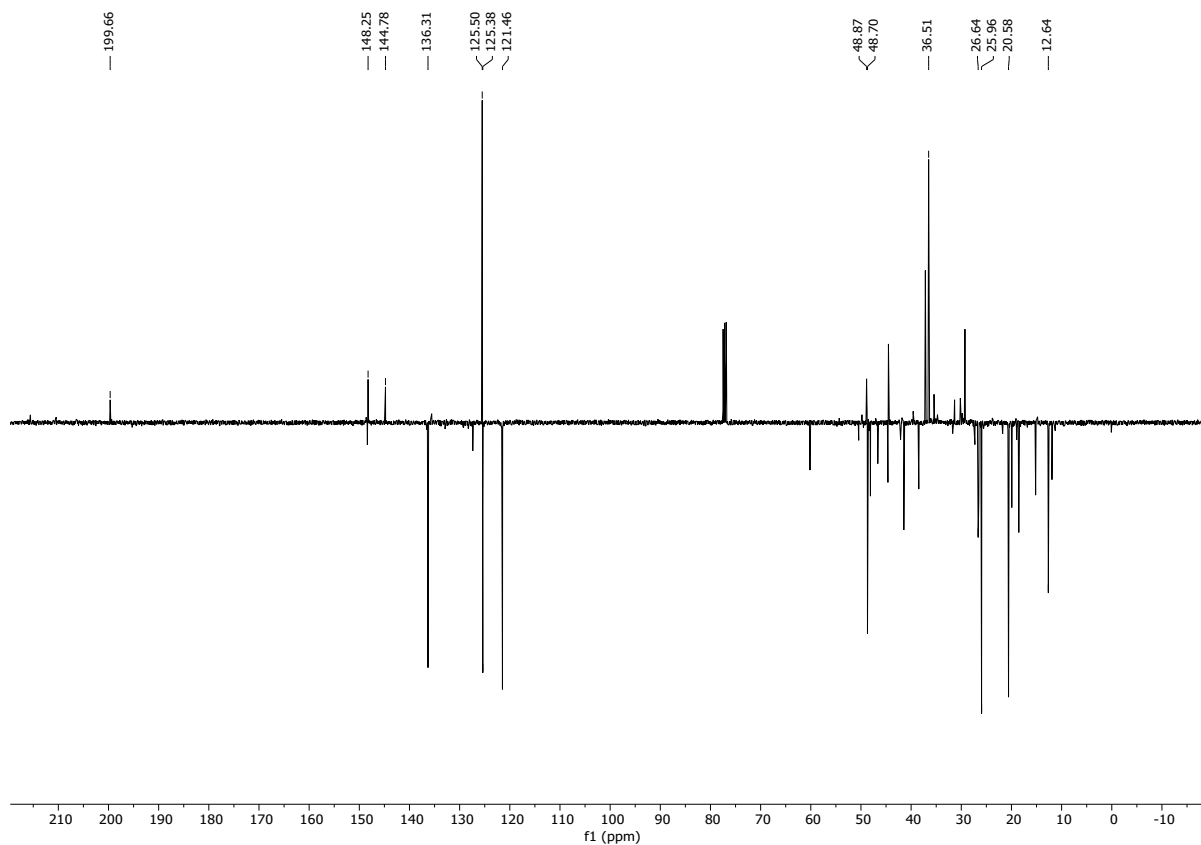

**(2*S*,*S'*)-1a**<sup>1</sup>H-NMR (CDCl<sub>3</sub>, 400 MHz)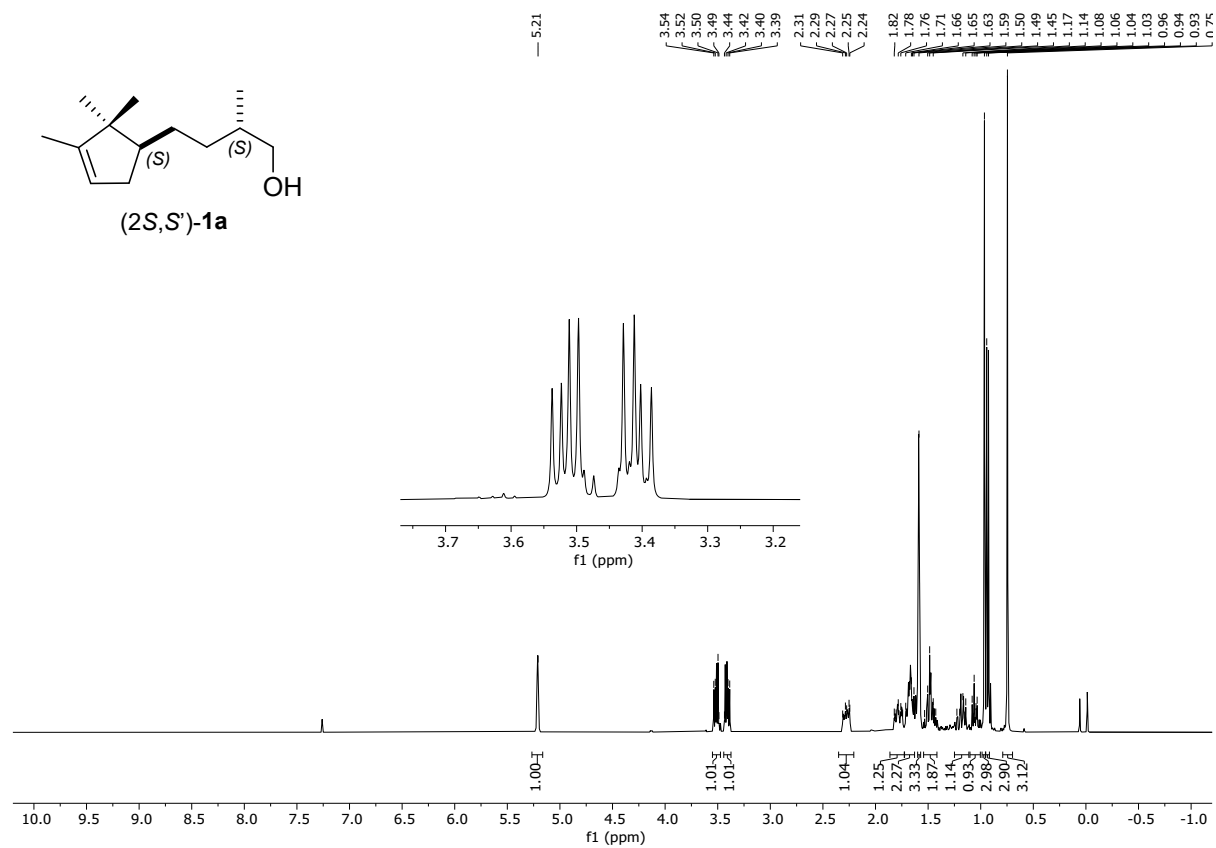<sup>13</sup>C{<sup>1</sup>H}-NMR (CDCl<sub>3</sub>, 101 MHz)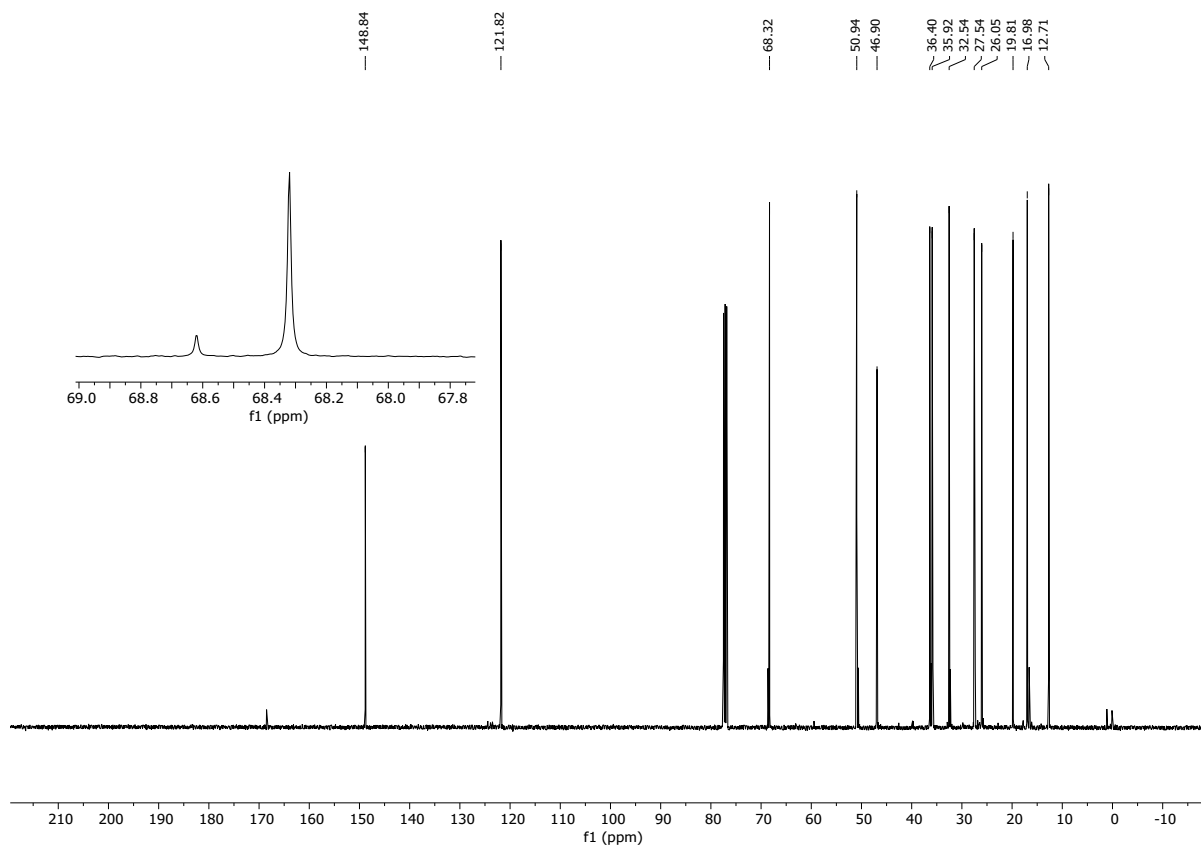

**(2*R*,*S'*)-1a**<sup>1</sup>H-NMR (CDCl<sub>3</sub>, 400 MHz)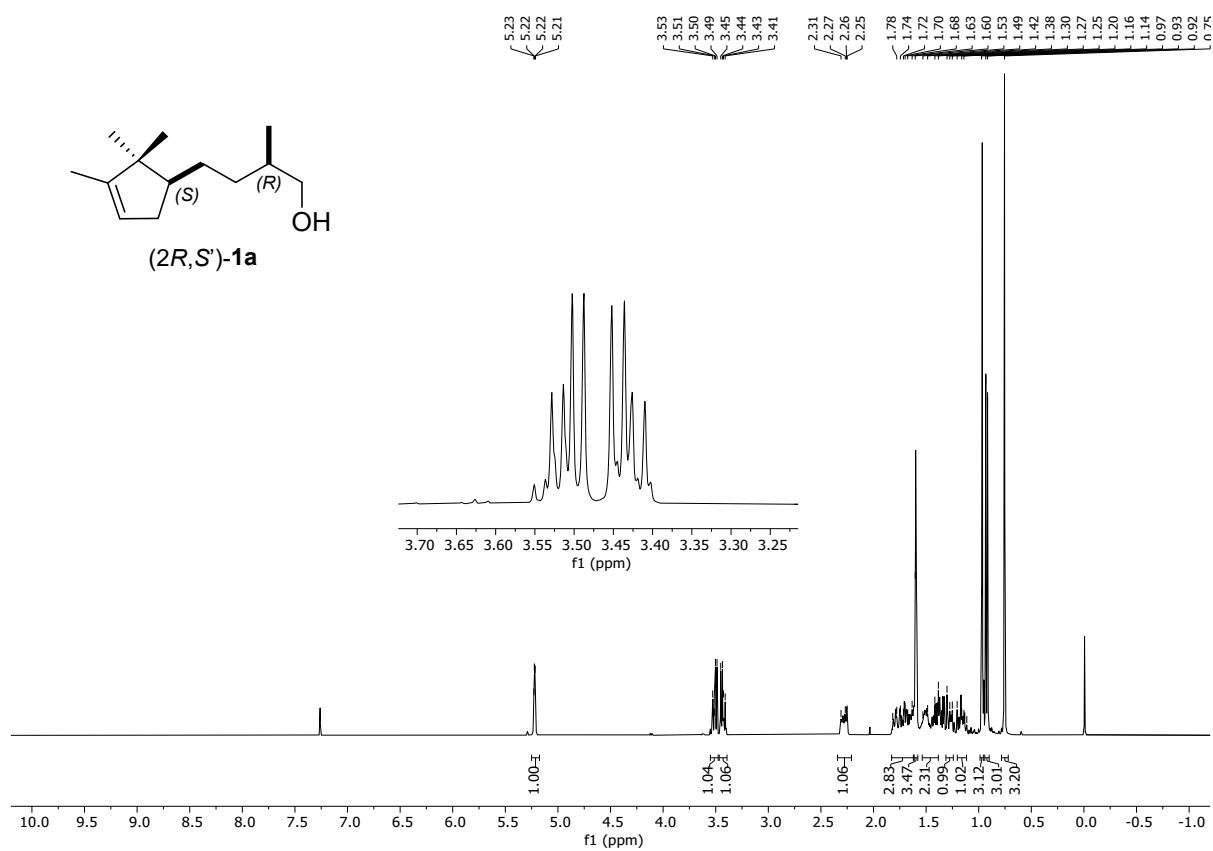<sup>13</sup>C{<sup>1</sup>H}-NMR (CDCl<sub>3</sub>, 101 MHz)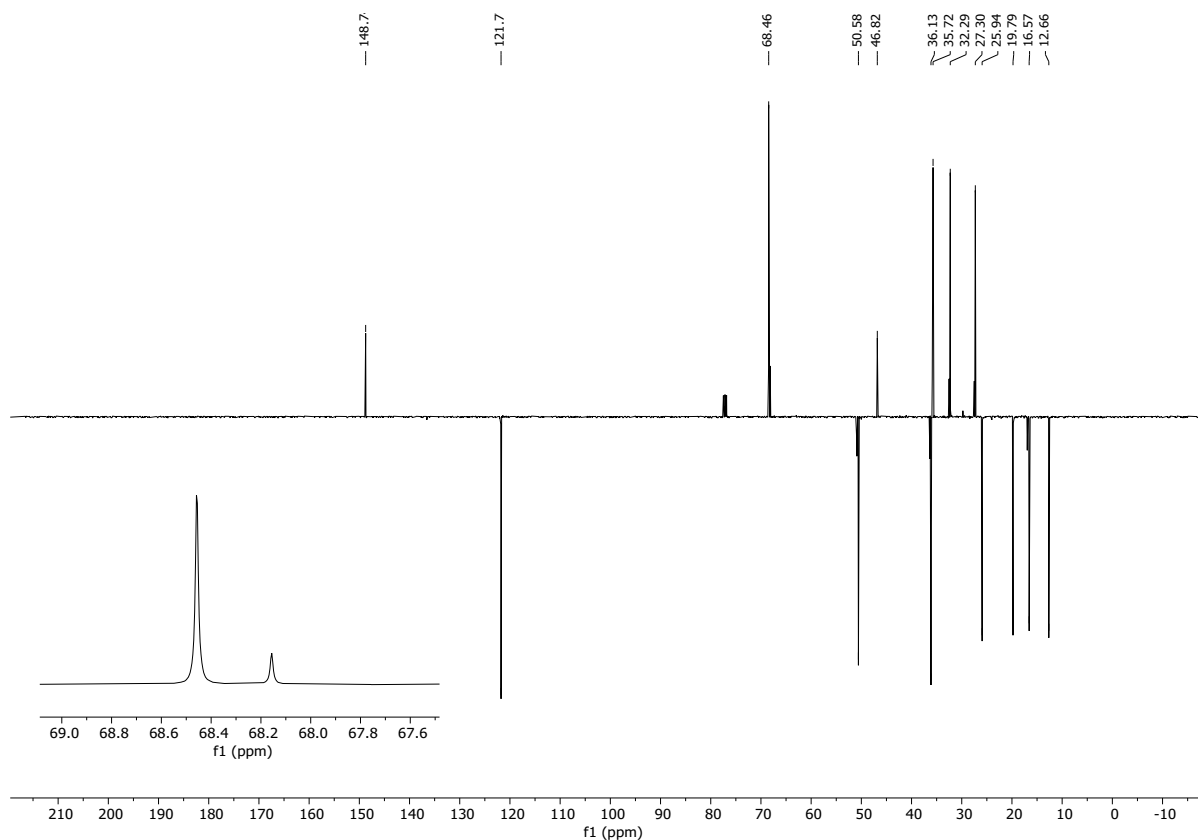

**(2*S*,*R'*)-1b**<sup>1</sup>H-NMR (CDCl<sub>3</sub>, 400 MHz)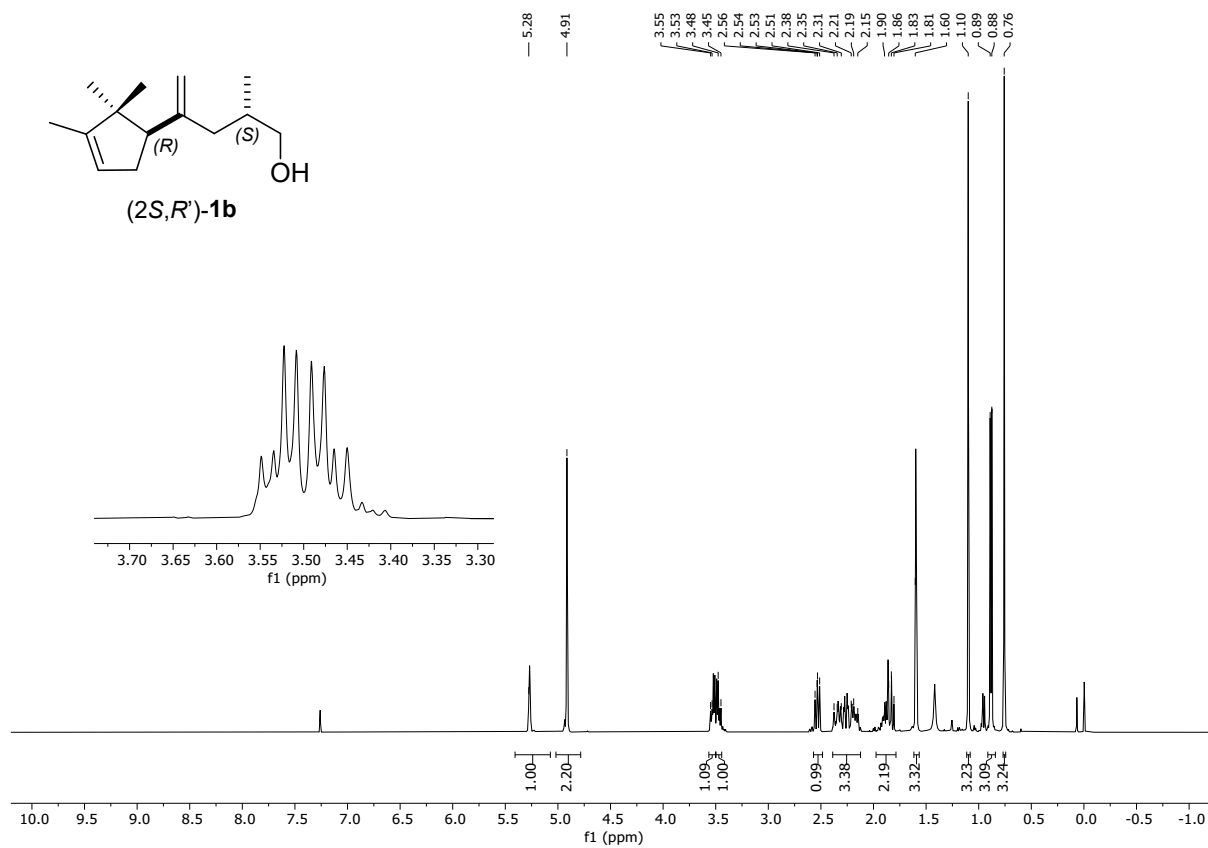<sup>13</sup>C{<sup>1</sup>H}-NMR (CDCl<sub>3</sub>, 101 MHz)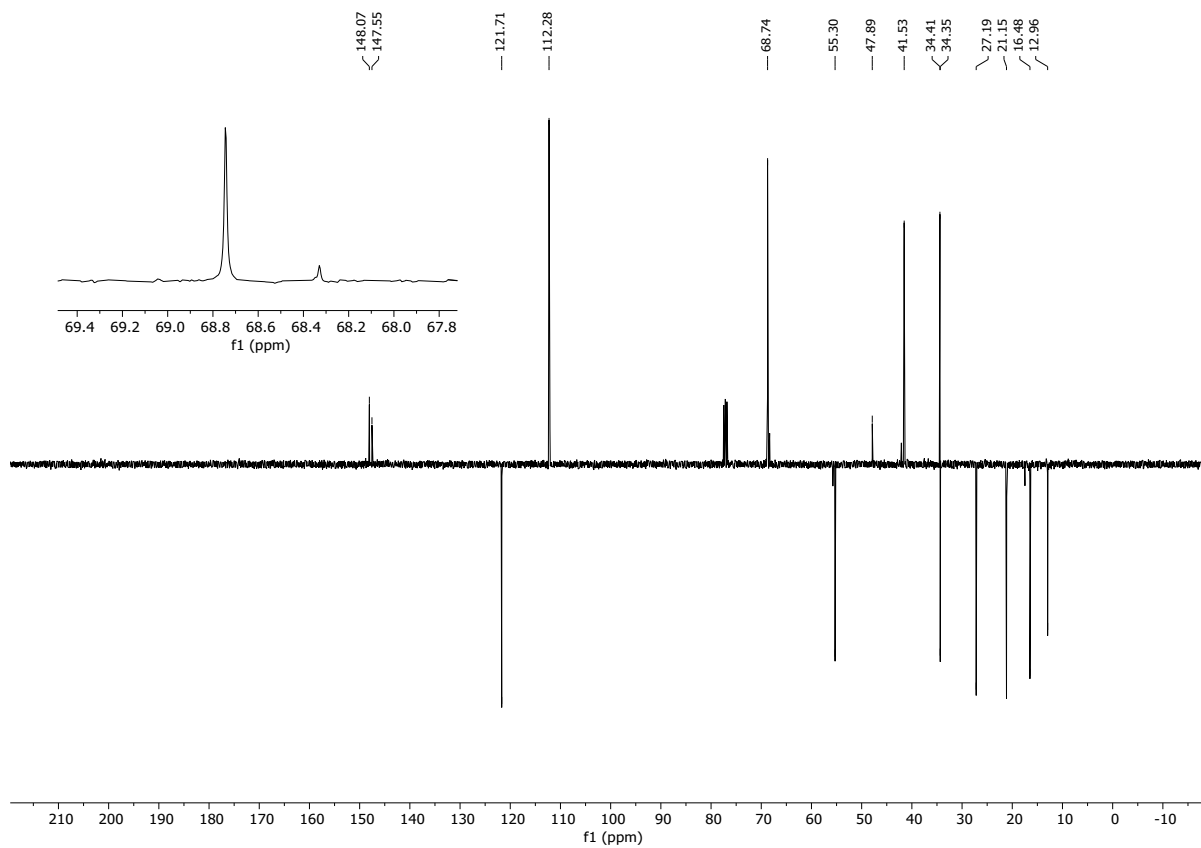

**(2*R*,*R'*)-1b**<sup>1</sup>H-NMR (CDCl<sub>3</sub>, 400 MHz)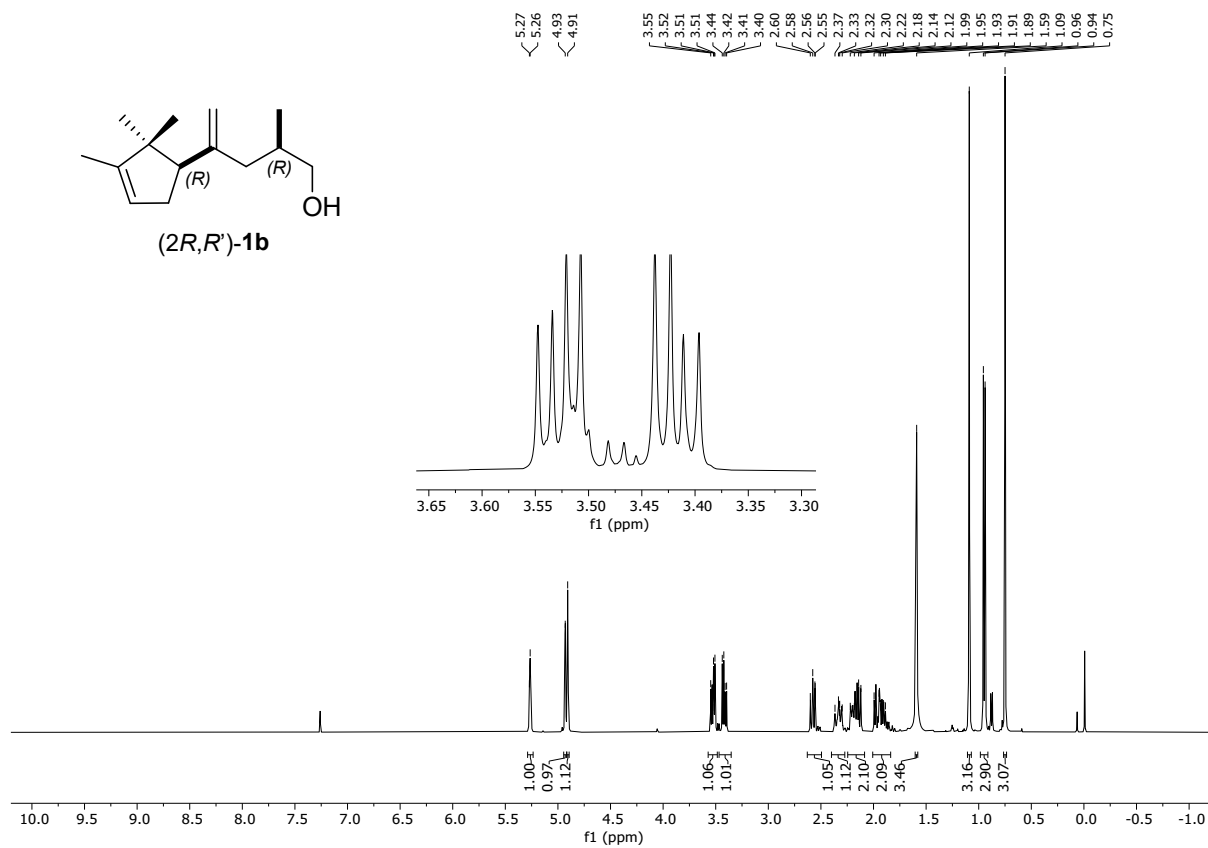<sup>13</sup>C{<sup>1</sup>H}-NMR (CDCl<sub>3</sub>, 101 MHz)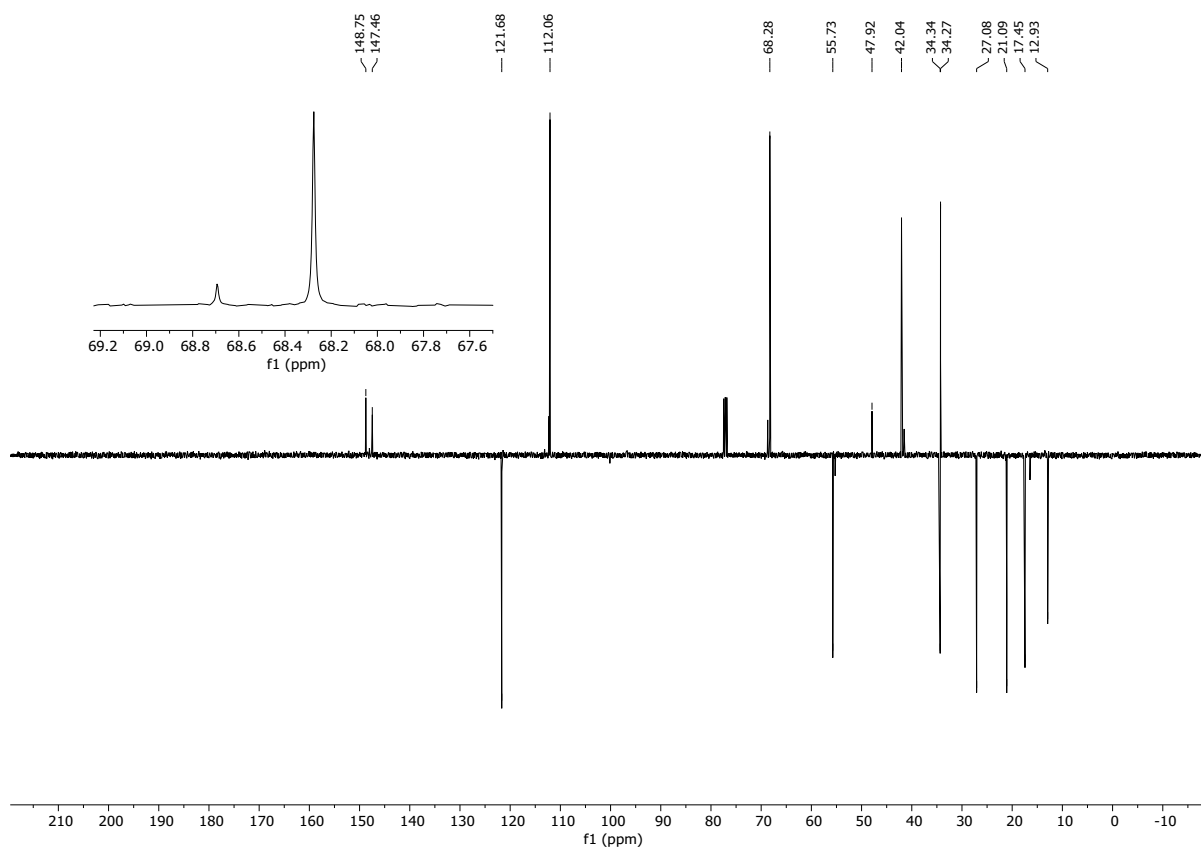

**(2*R*,3*S*,*S'*)-1c**<sup>1</sup>H-NMR (CDCl<sub>3</sub>, 400 MHz)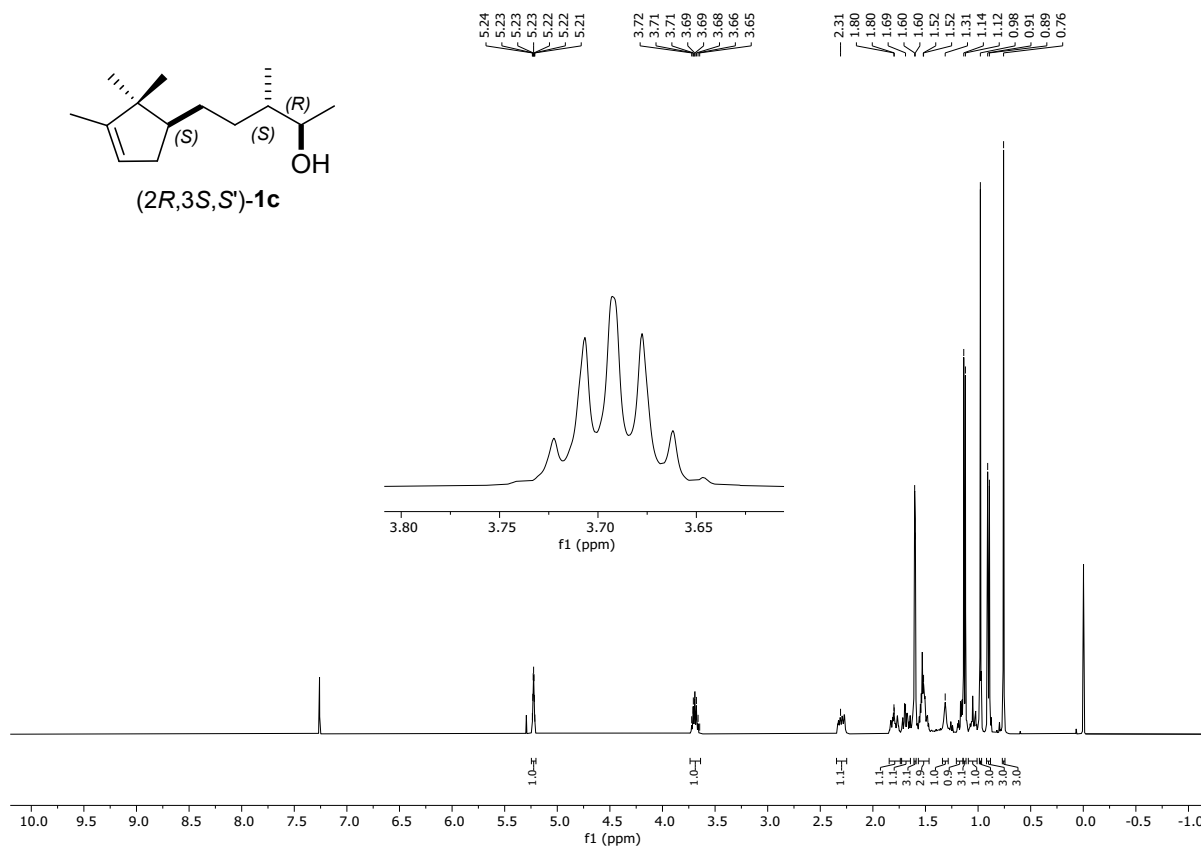<sup>13</sup>C{<sup>1</sup>H}-NMR (CDCl<sub>3</sub>, 101 MHz)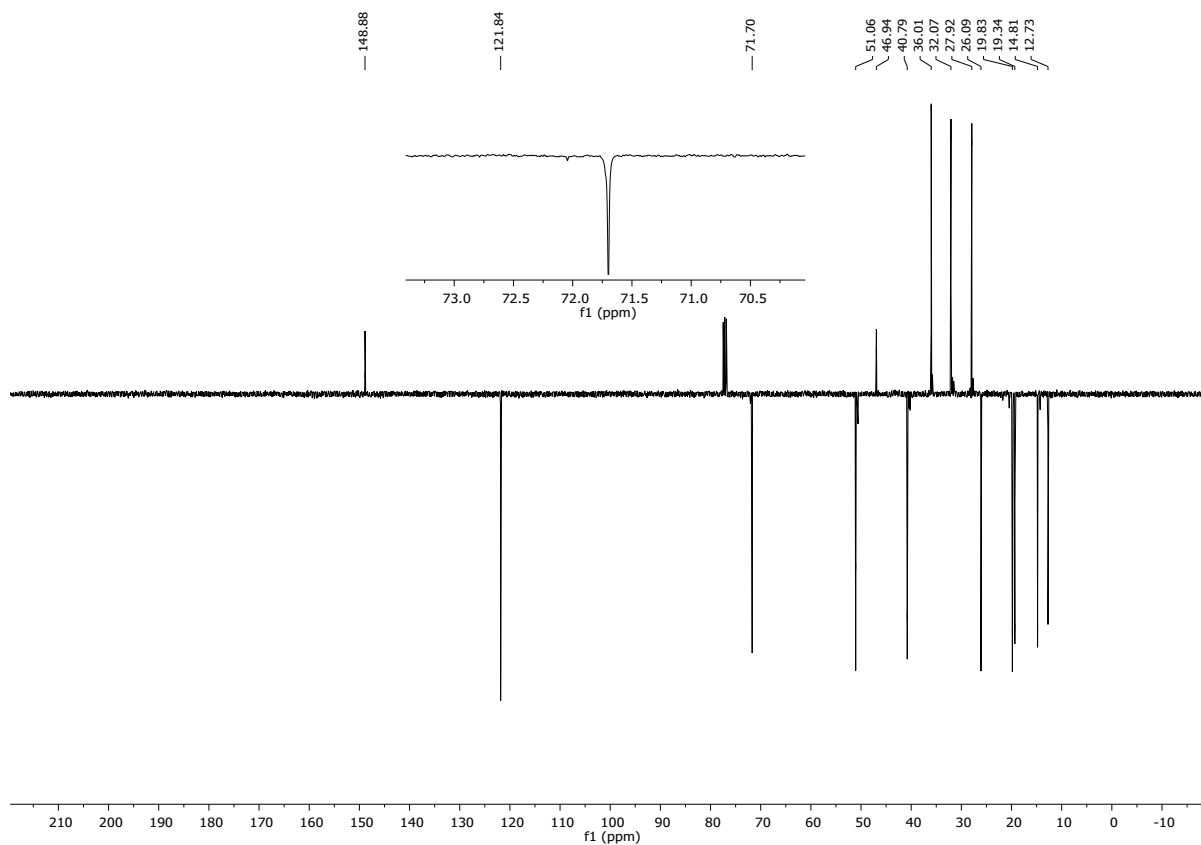

**(2*S*,3*S*,*S'*)-1c**<sup>1</sup>H-NMR (CDCl<sub>3</sub>, 400 MHz)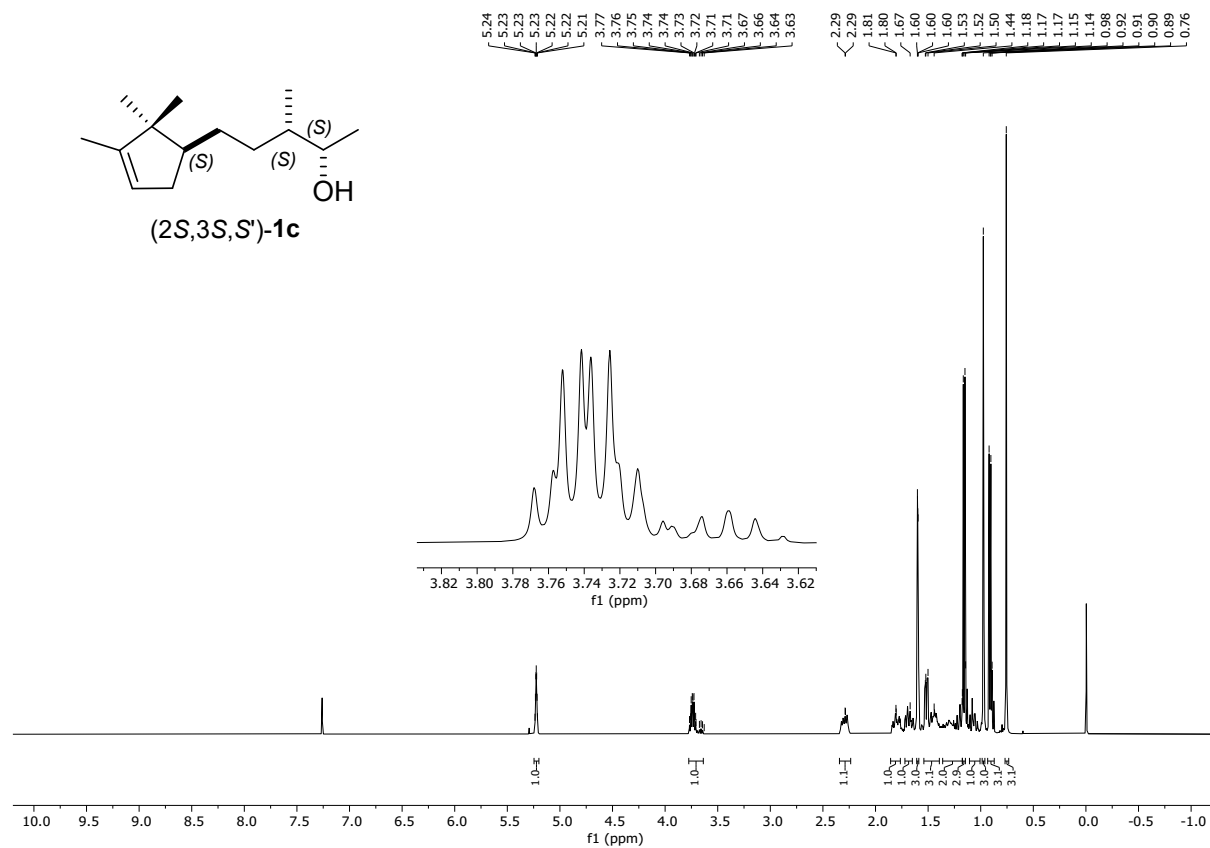<sup>13</sup>C{<sup>1</sup>H}-NMR (CDCl<sub>3</sub>, 101 MHz)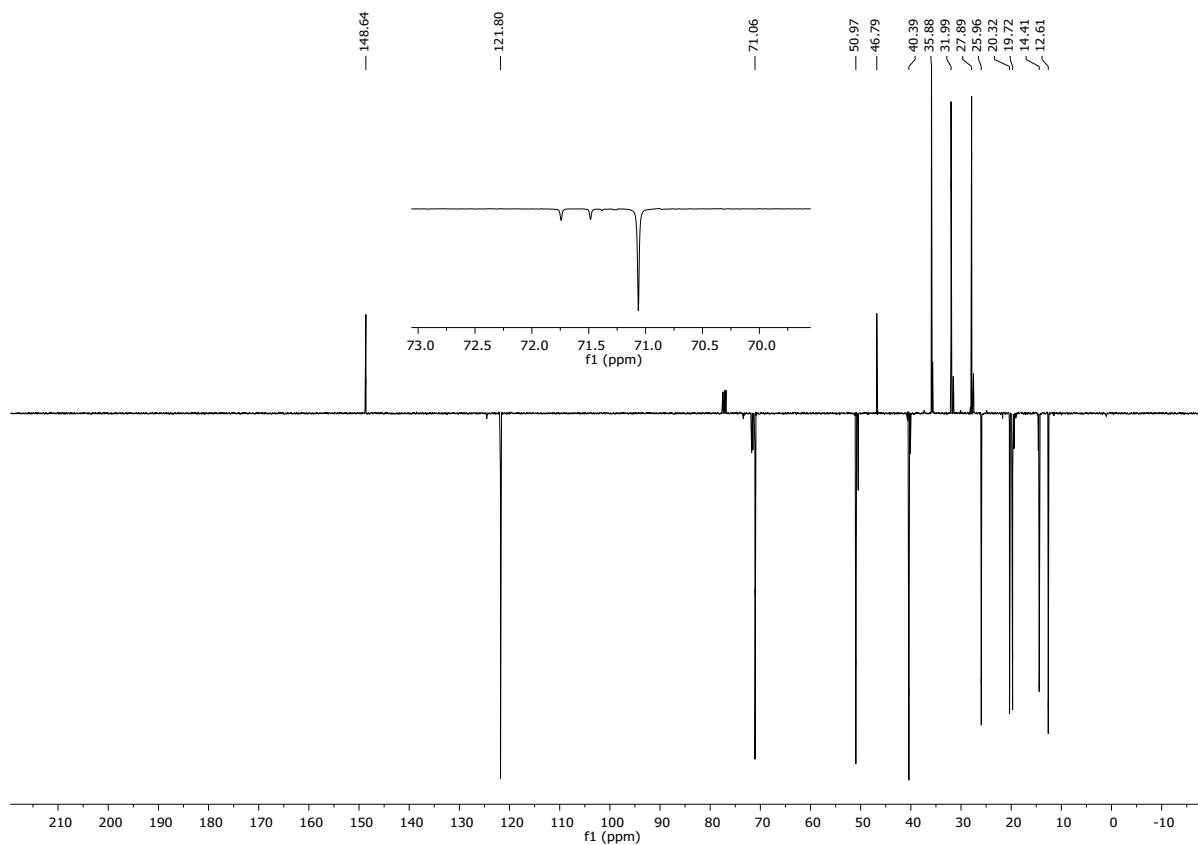



**(2*S*,3*R*,*S'*)-1c**<sup>1</sup>H-NMR (CDCl<sub>3</sub>, 400 MHz)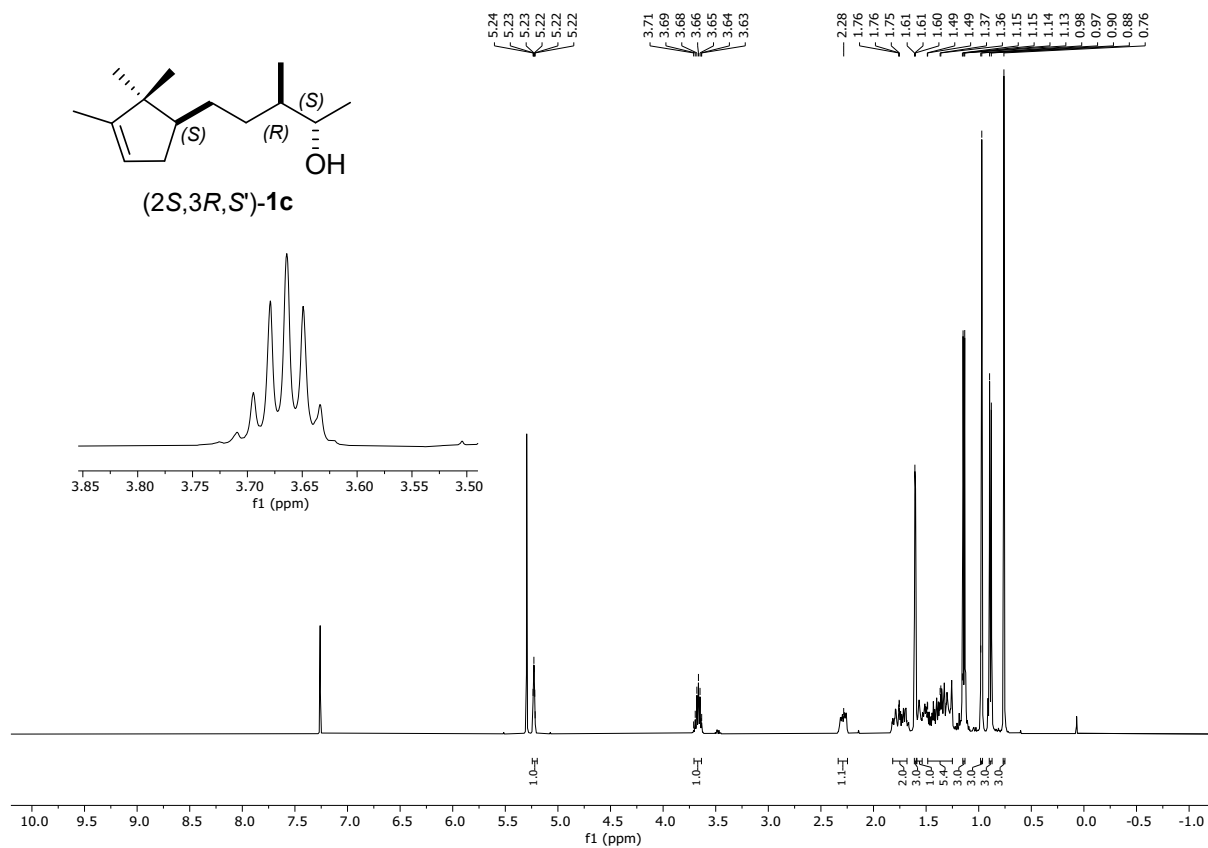<sup>13</sup>C{<sup>1</sup>H}-NMR (CDCl<sub>3</sub>, 101 MHz)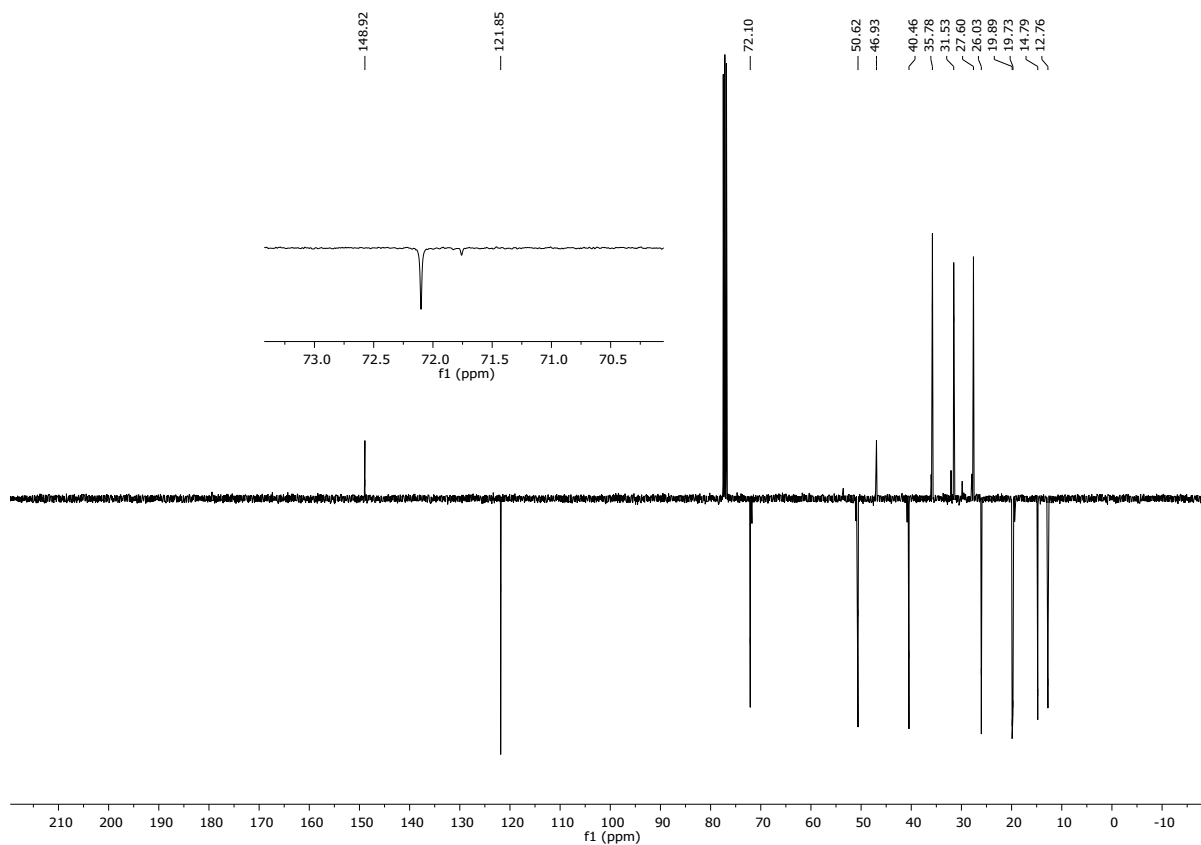

**(2*R*,3*R*,*S'*)-1c**<sup>1</sup>H-NMR (CDCl<sub>3</sub>, 400 MHz)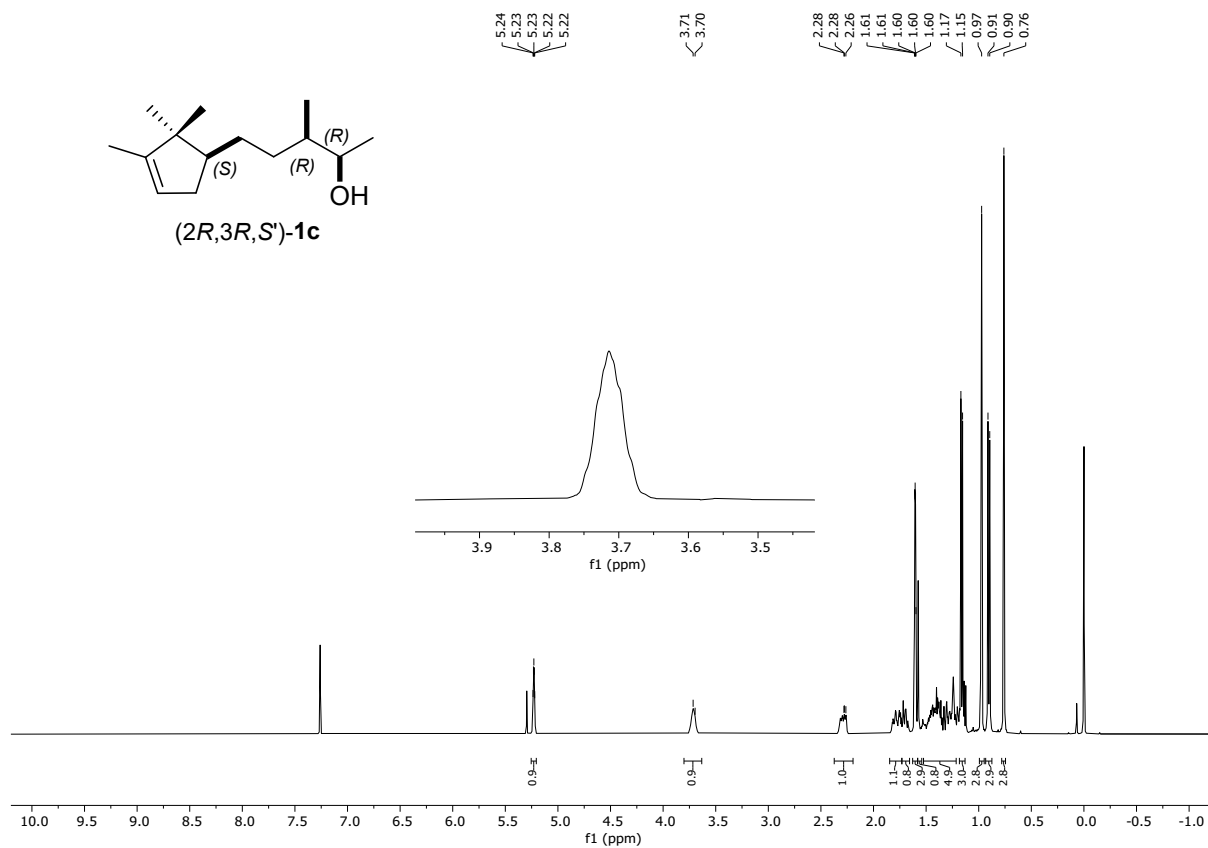<sup>13</sup>C{<sup>1</sup>H}-NMR (CDCl<sub>3</sub>, 101 MHz)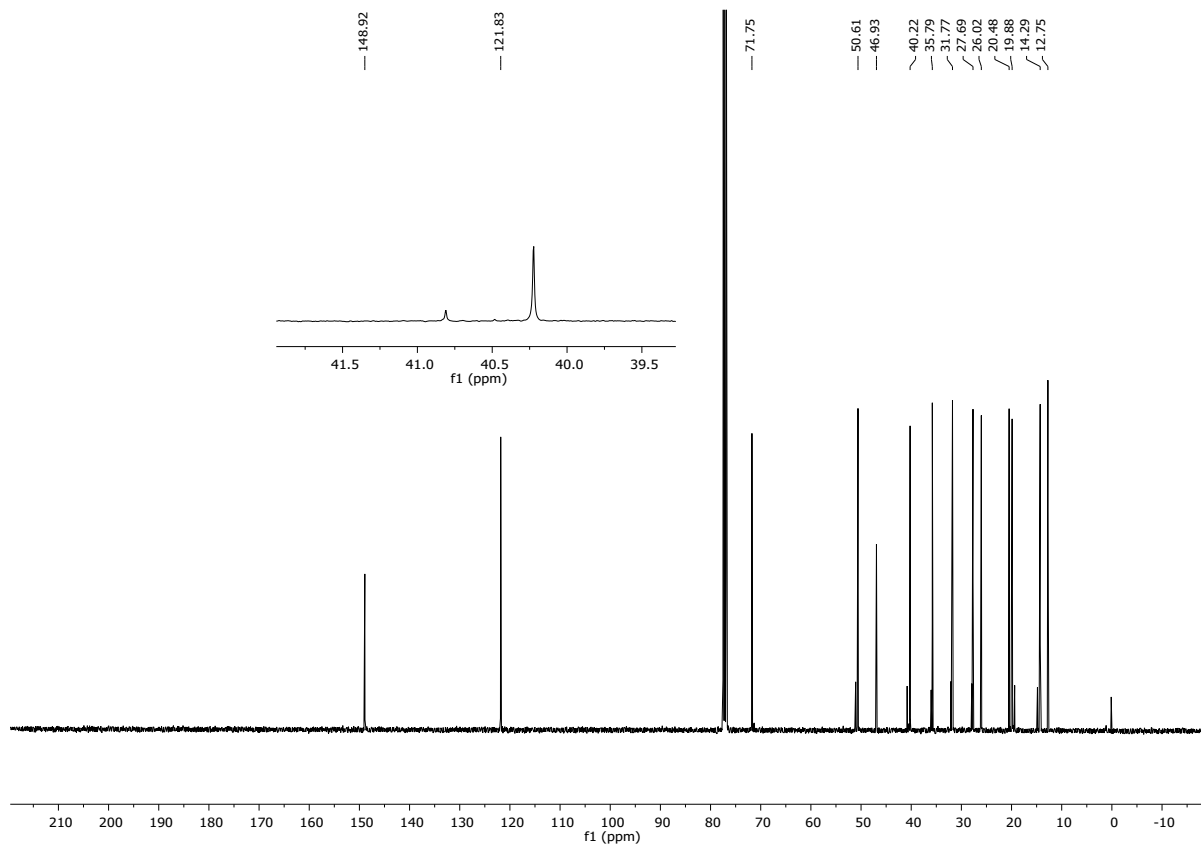

**(Z,2*S*,3*R*,*S'*)-1d**<sup>1</sup>H-NMR (CDCl<sub>3</sub>, 400 MHz)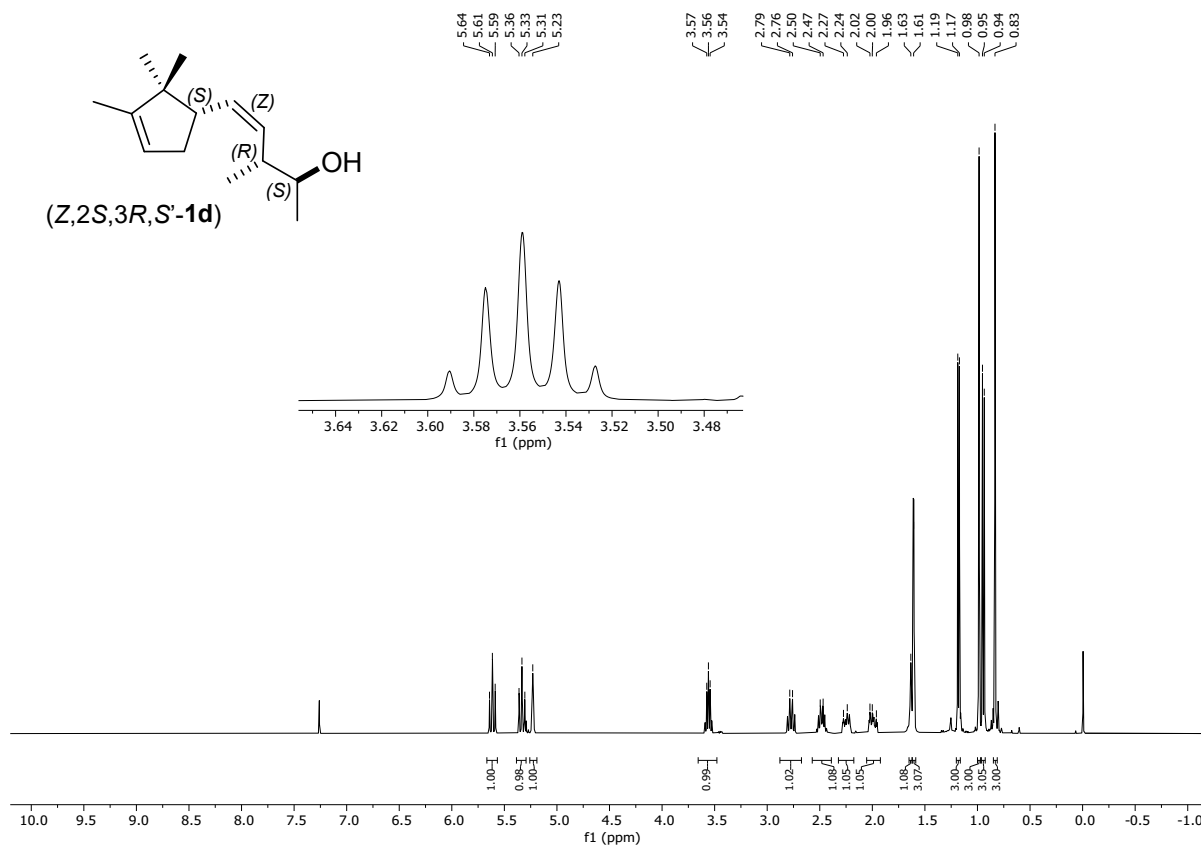<sup>13</sup>C{<sup>1</sup>H}-NMR (CDCl<sub>3</sub>, 101 MHz)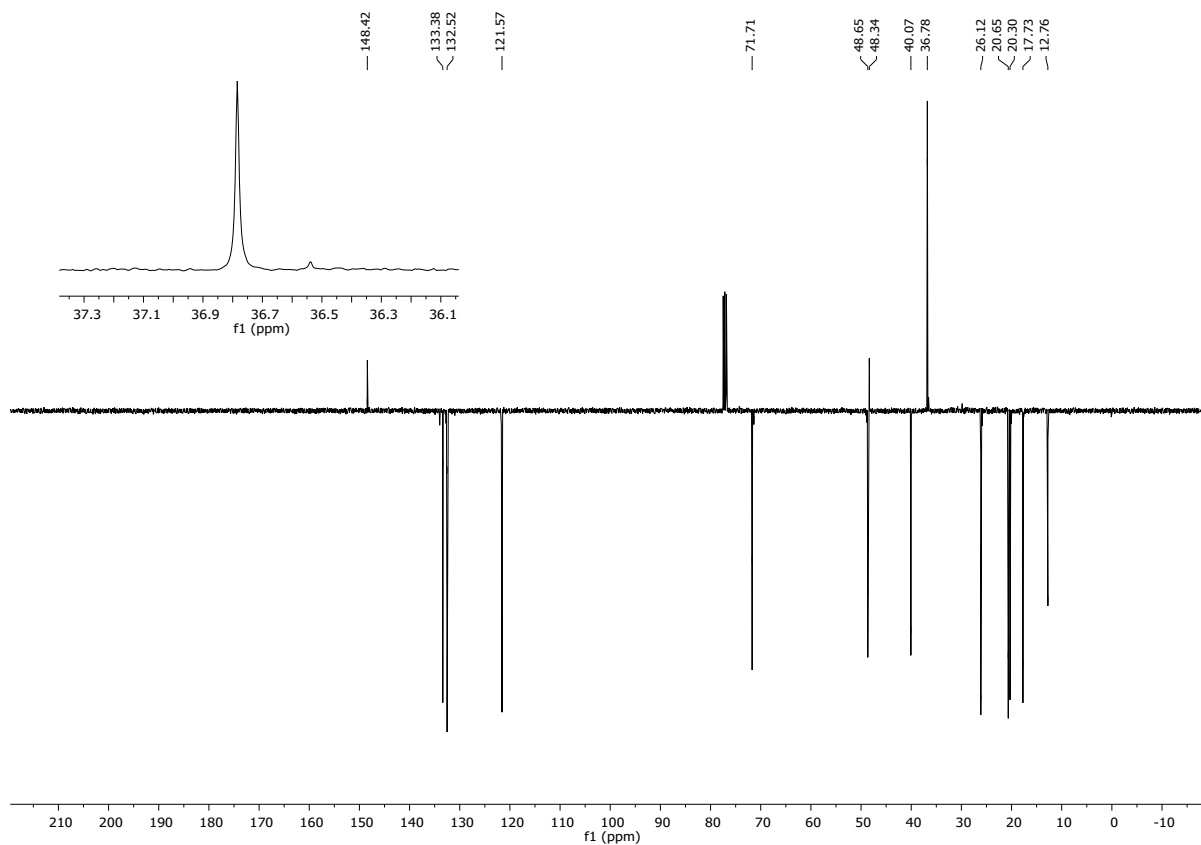

$^1\text{H}$ - $^1\text{H}$  COSY (phase sensitive) ( $\text{CDCl}_3$ , 400 MHz)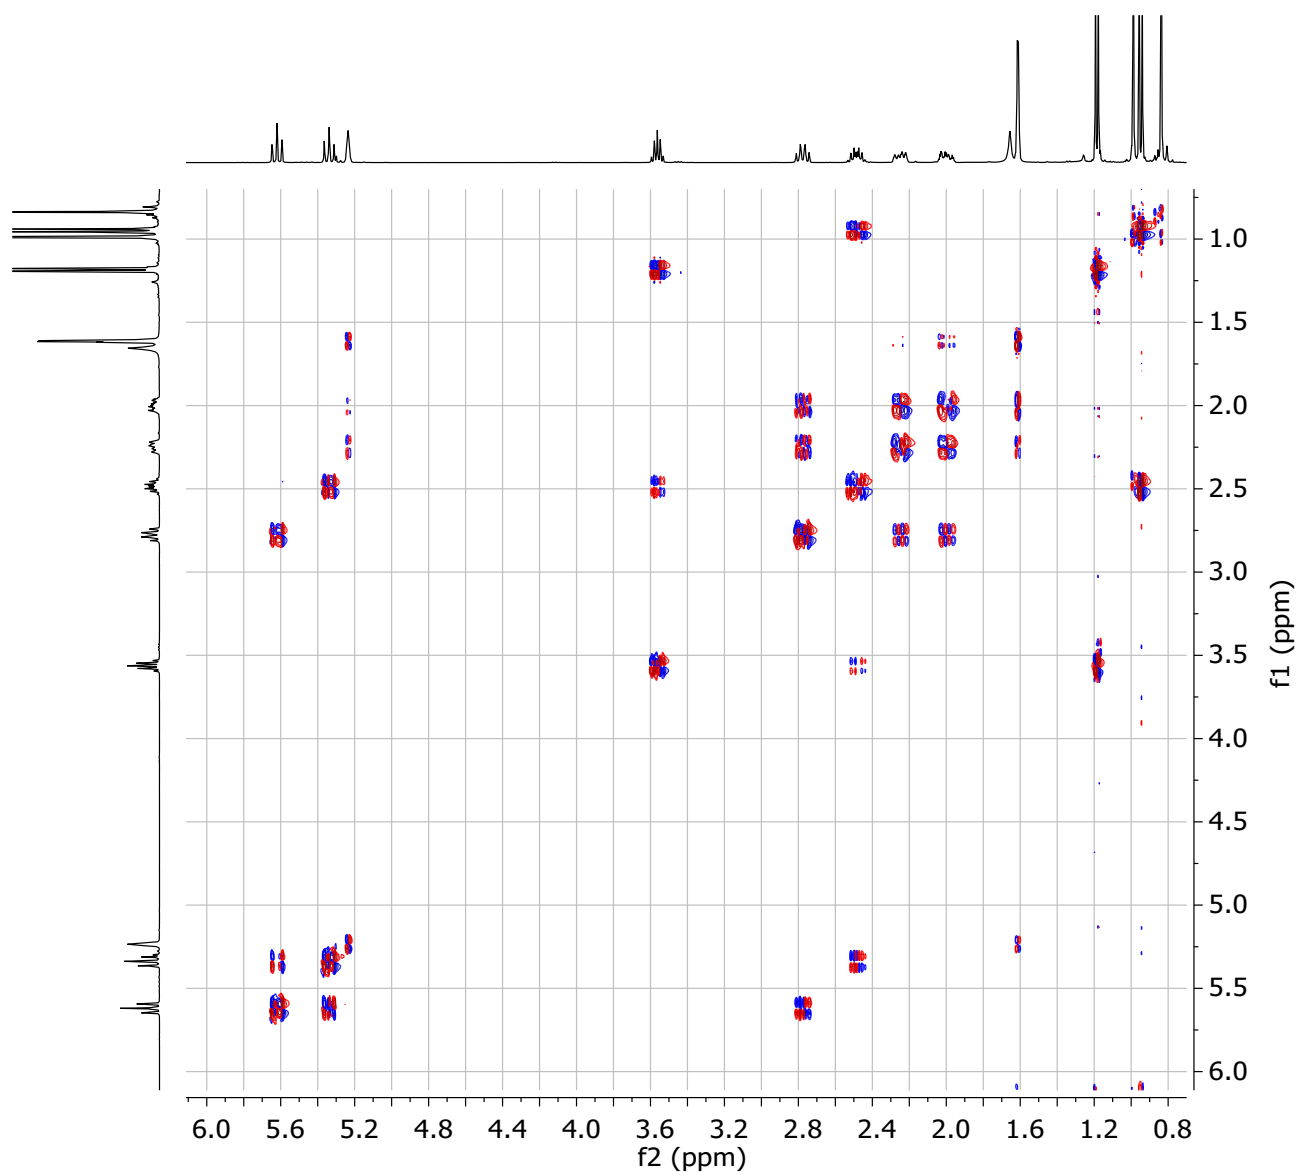

**(3*R*,5'*S*)-7c**<sup>1</sup>H-NMR (CDCl<sub>3</sub>, 400 MHz)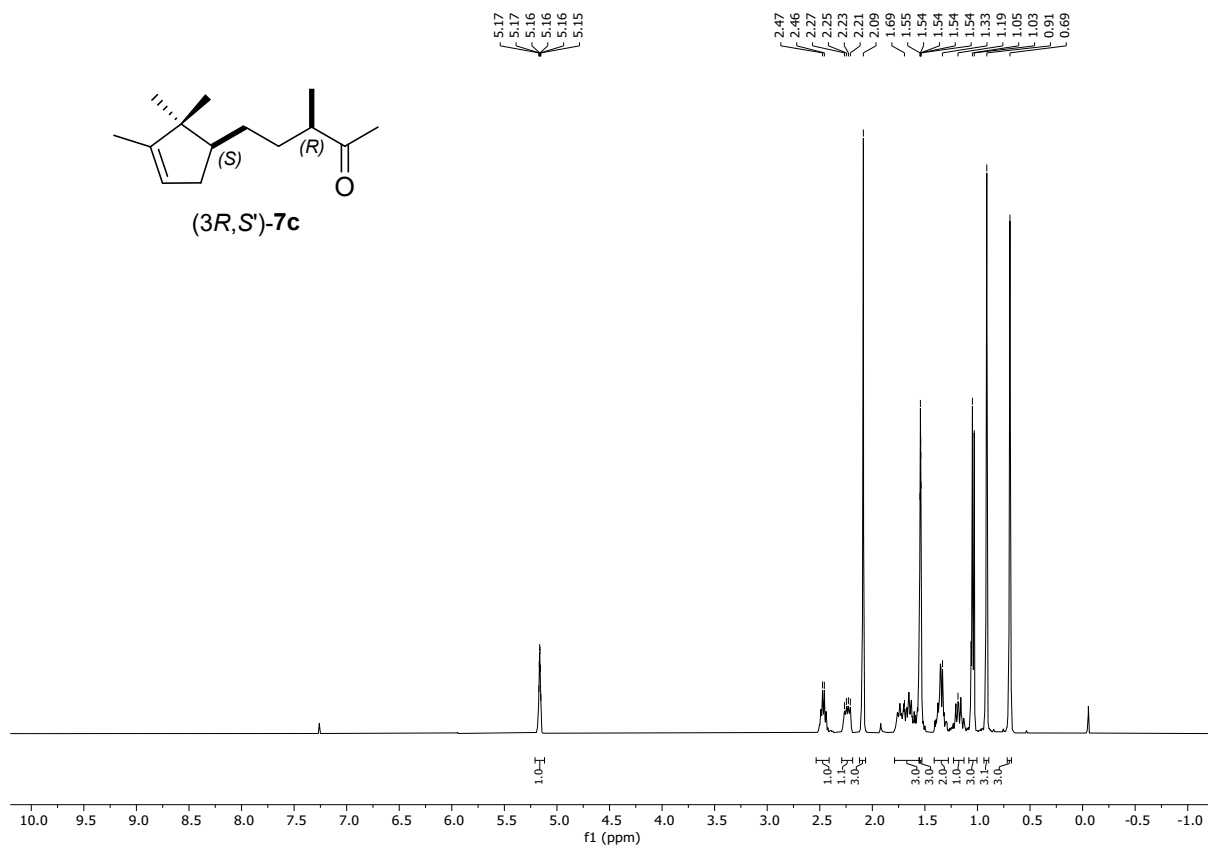<sup>13</sup>C{<sup>1</sup>H}-NMR (CDCl<sub>3</sub>, 101 MHz)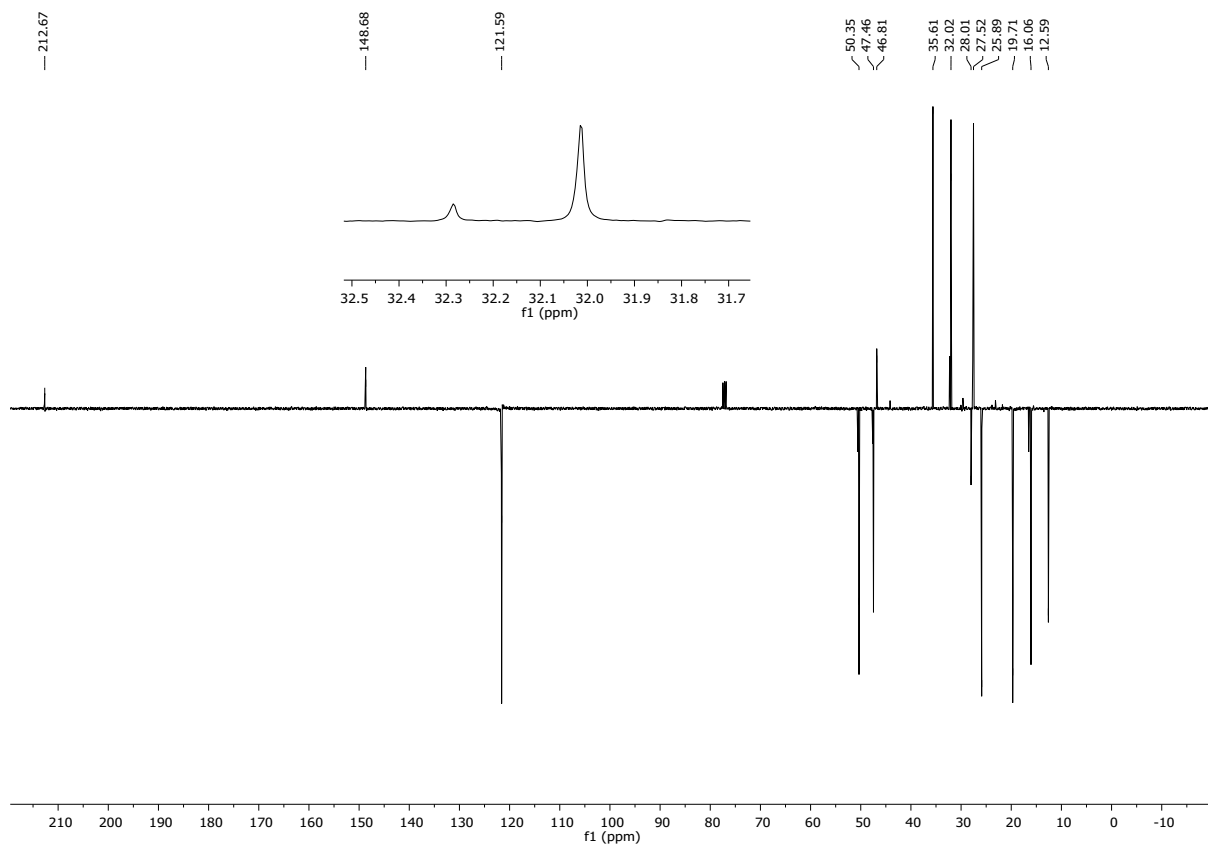

**(Z,3*R*,*S'*)-7d**<sup>1</sup>H-NMR (CDCl<sub>3</sub>, 400 MHz)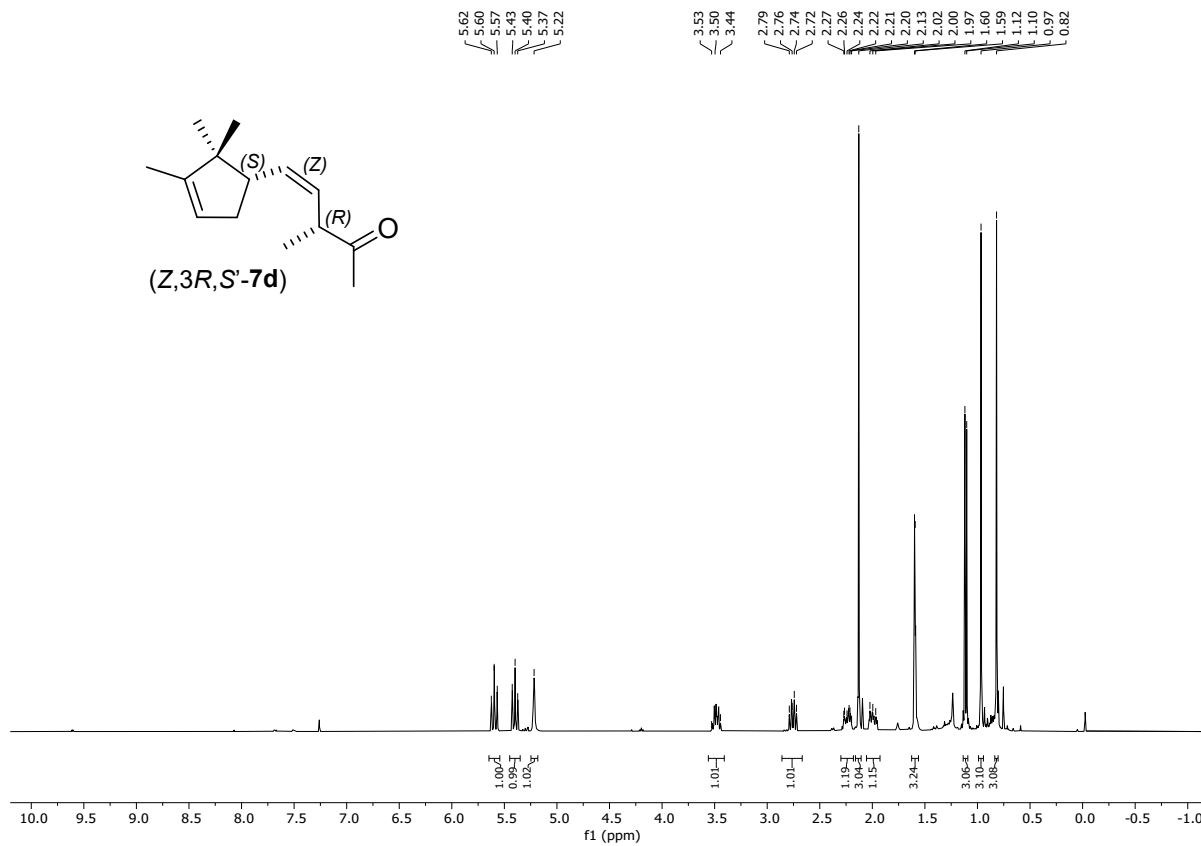<sup>13</sup>C{<sup>1</sup>H}-NMR (CDCl<sub>3</sub>, 101 MHz)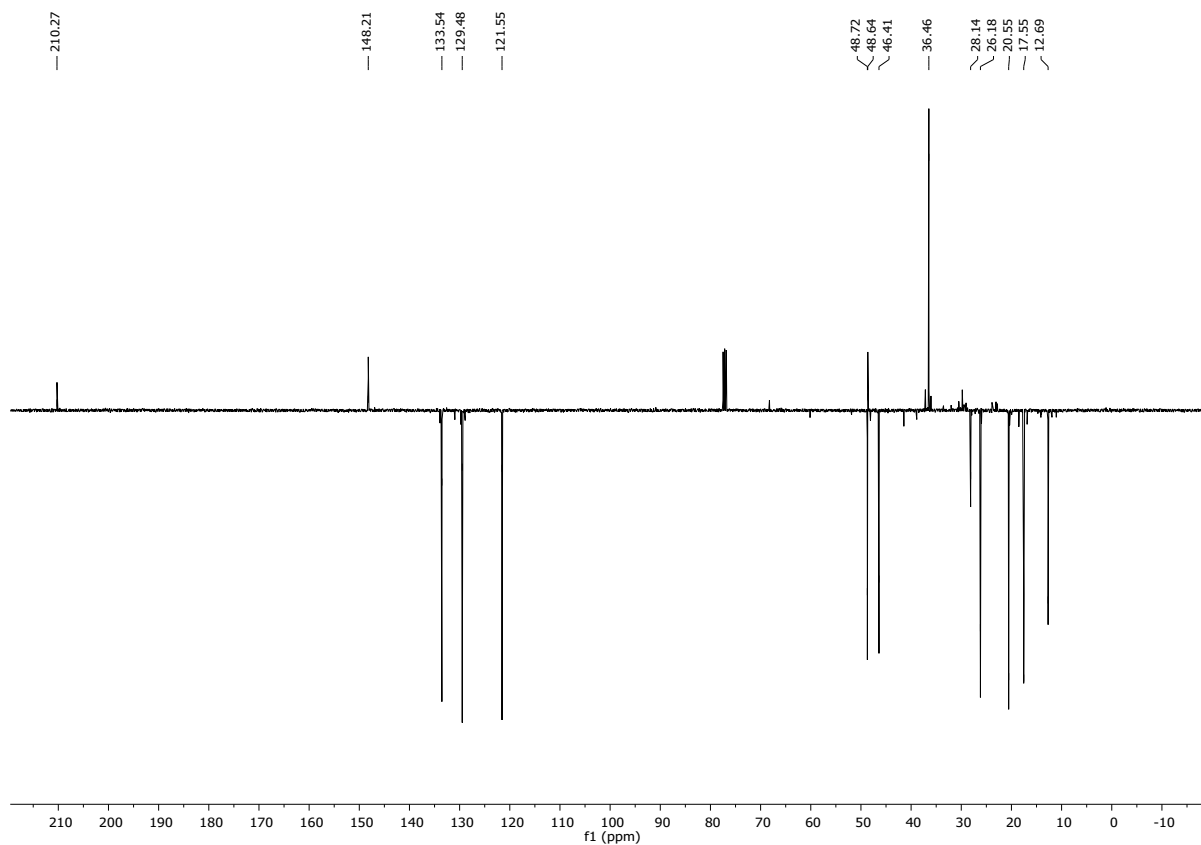

**1a, Brahmanol®** $^1\text{H-NMR}$  ( $\text{CDCl}_3$ , 400 MHz)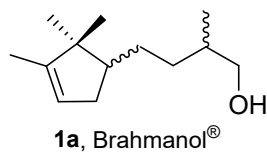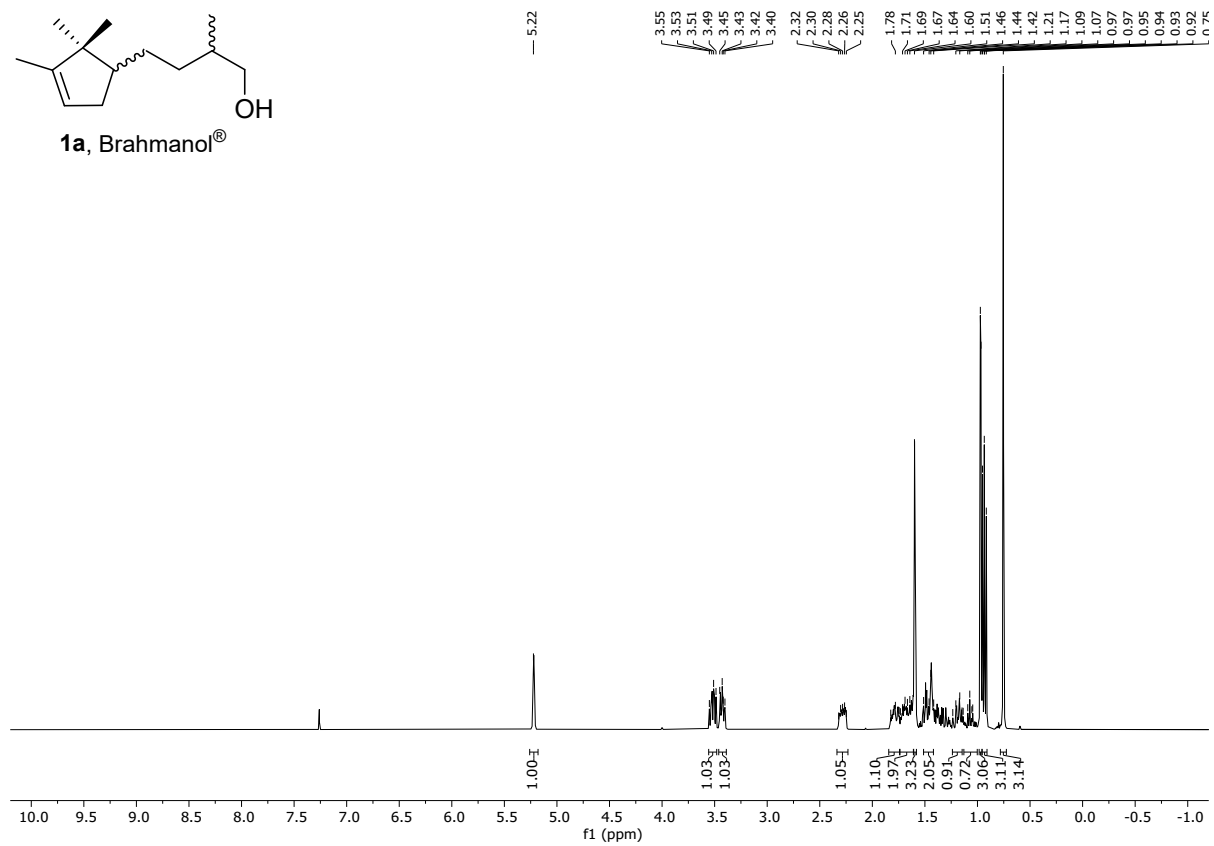 $^{13}\text{C}\{^1\text{H}\}$ -NMR ( $\text{CDCl}_3$ , 101 MHz)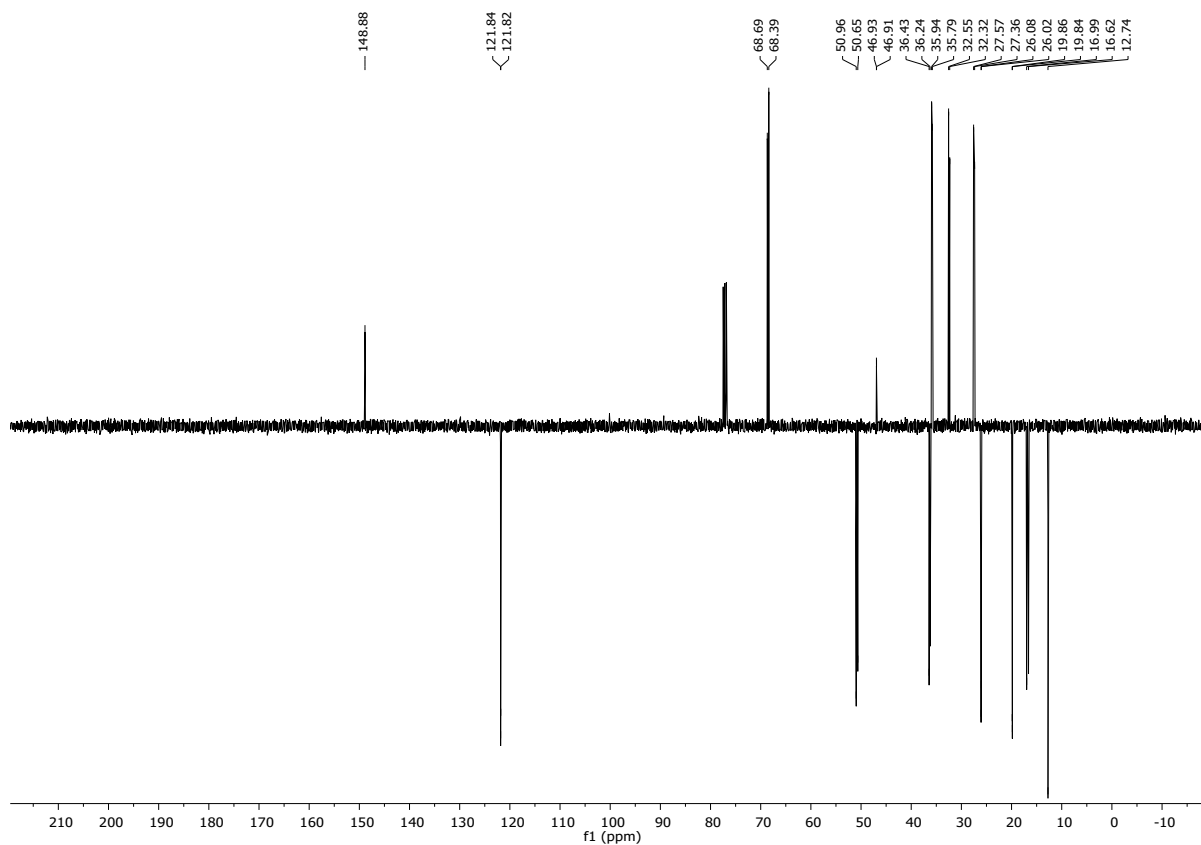

**1b, Firsantol®** $^1\text{H-NMR}$  ( $\text{CDCl}_3$ , 400 MHz)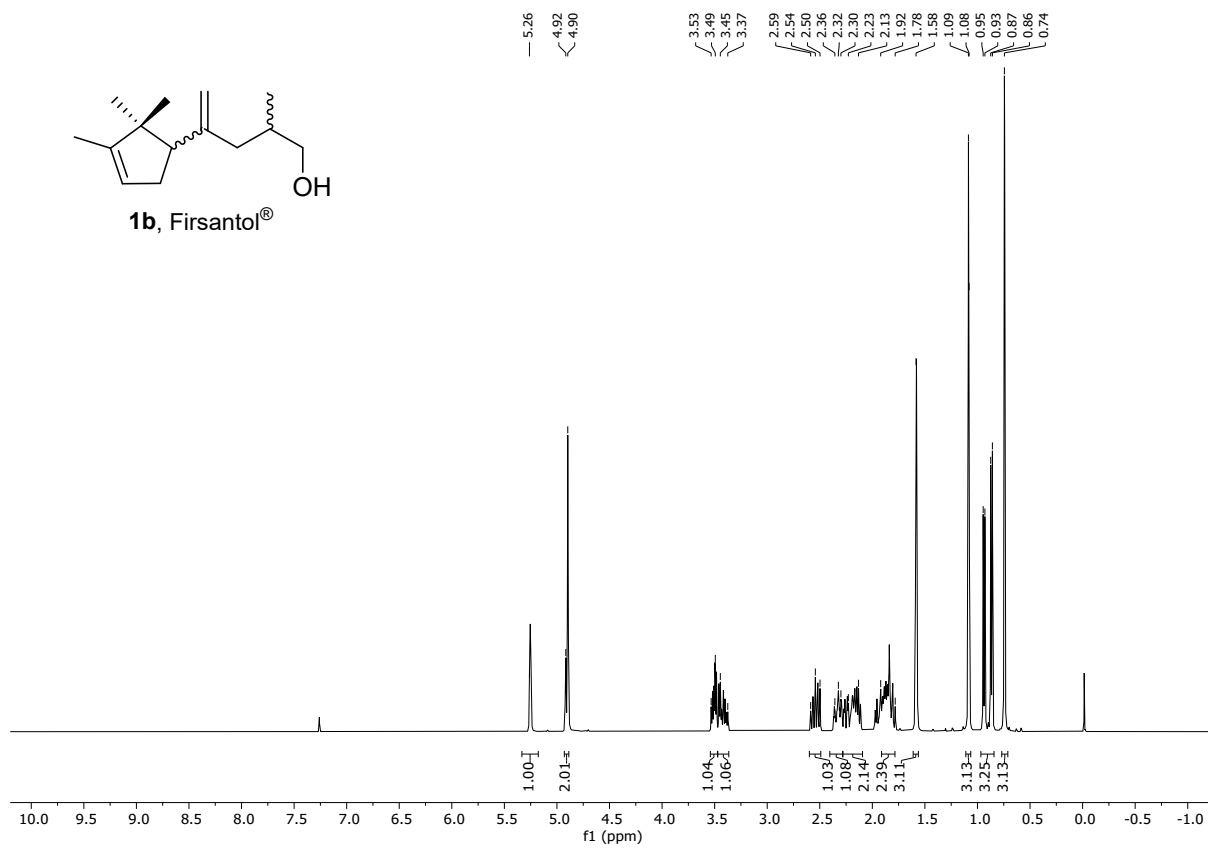 $^{13}\text{C}\{^1\text{H}\}$ -NMR ( $\text{CDCl}_3$ , 101 MHz)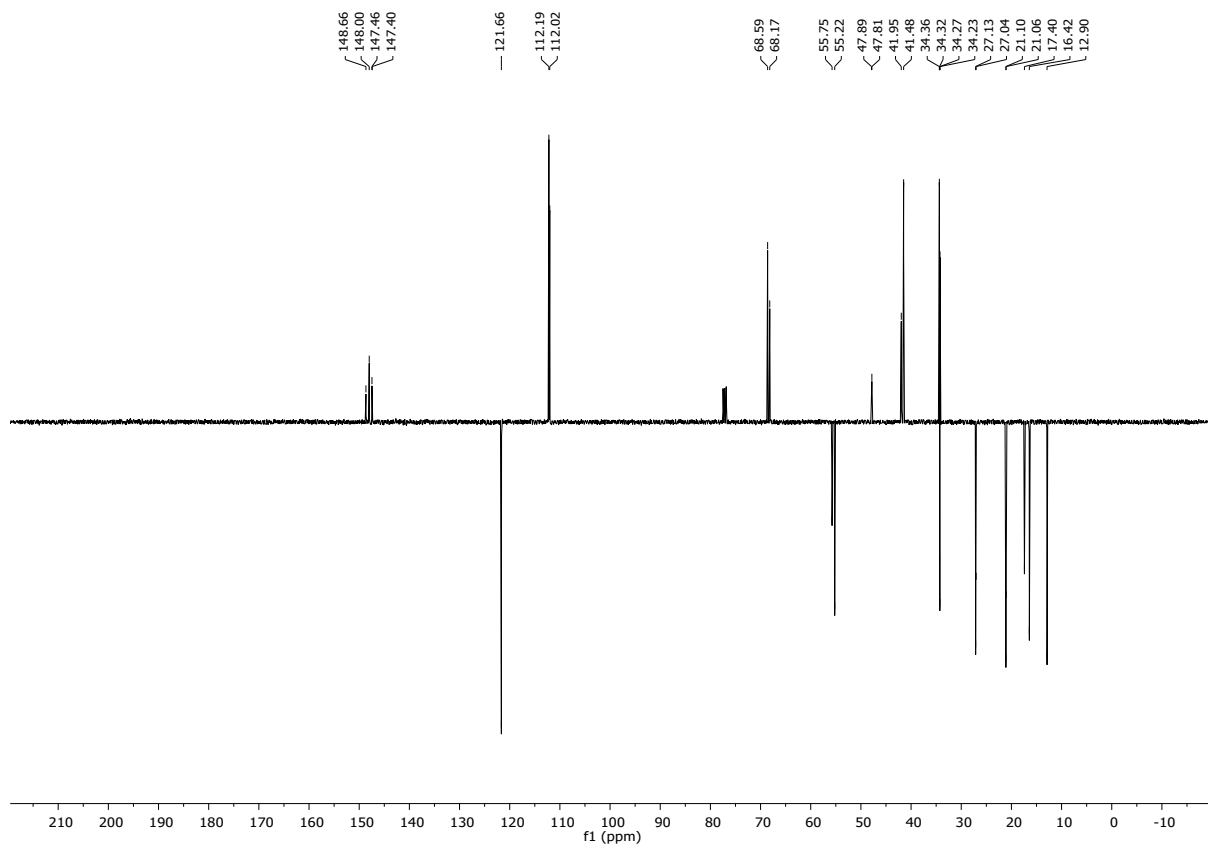





**1d, Ebanol®**<sup>1</sup>H-NMR (CDCl<sub>3</sub>, 400 MHz)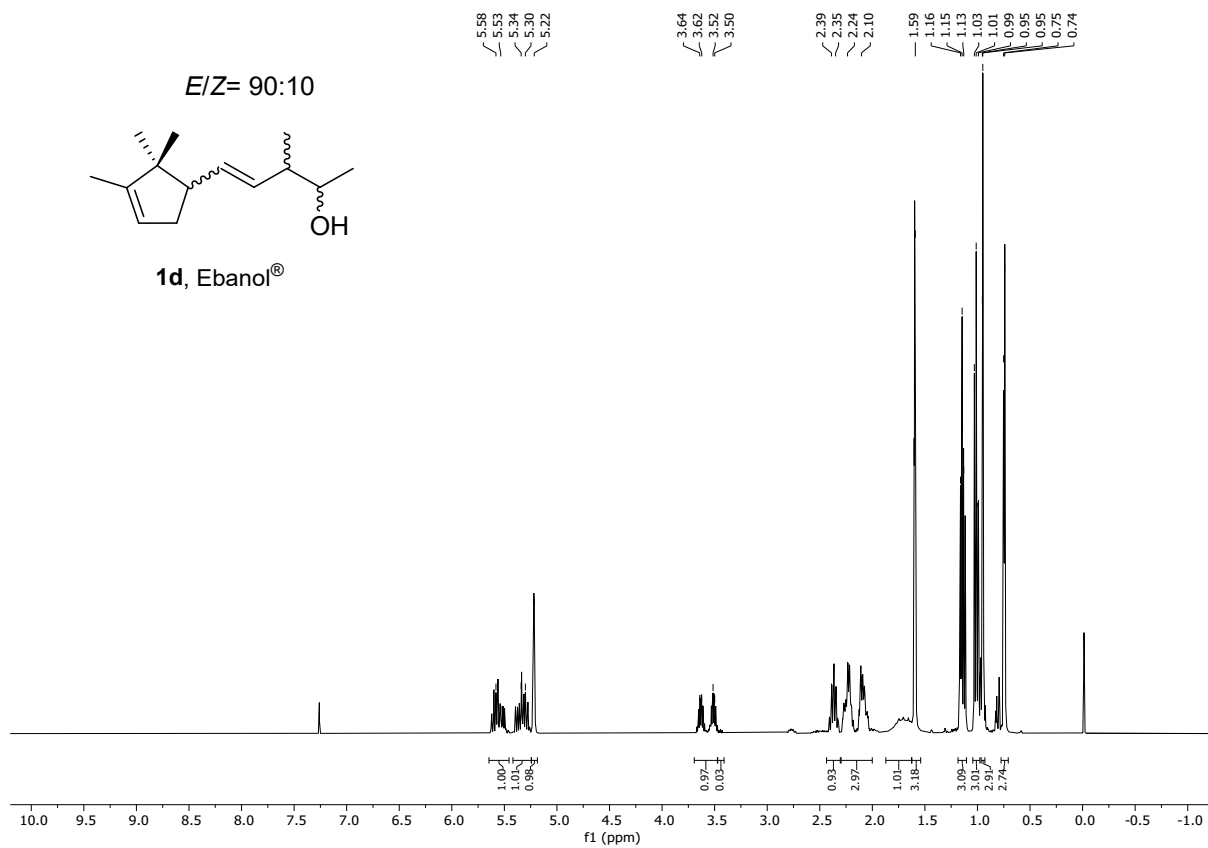<sup>13</sup>C{<sup>1</sup>H}-NMR (CDCl<sub>3</sub>, 101 MHz)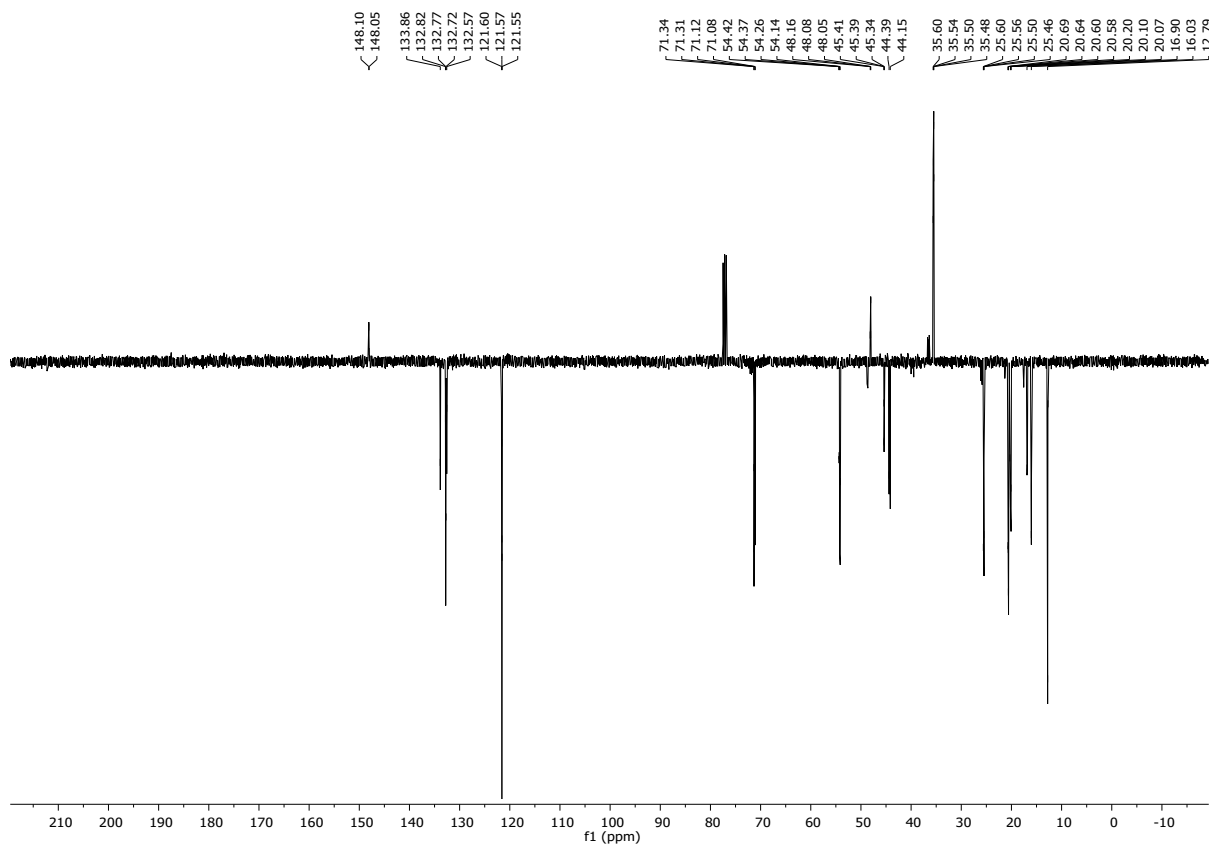

**(R)-MTPA-Evo440**<sup>1</sup>H-NMR (CDCl<sub>3</sub>, 400 MHz)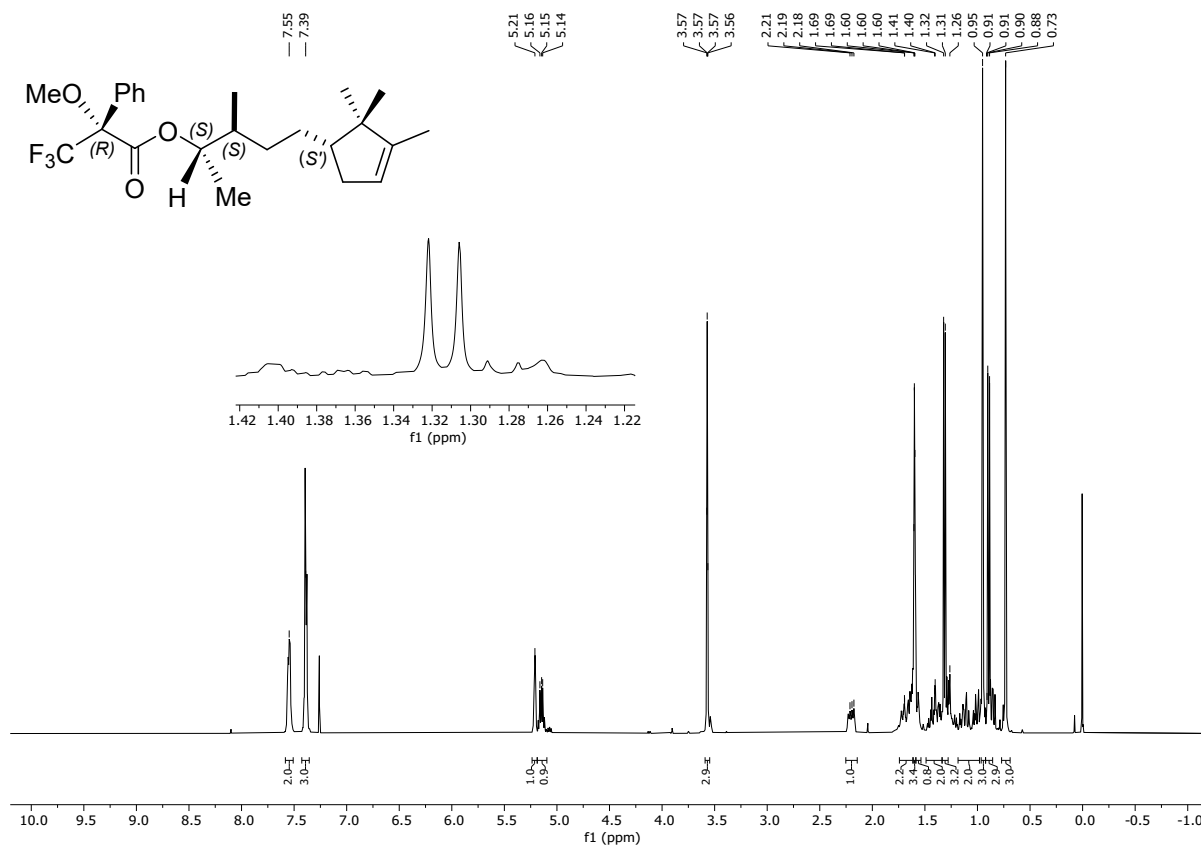<sup>13</sup>C{<sup>1</sup>H}-NMR (CDCl<sub>3</sub>, 101 MHz)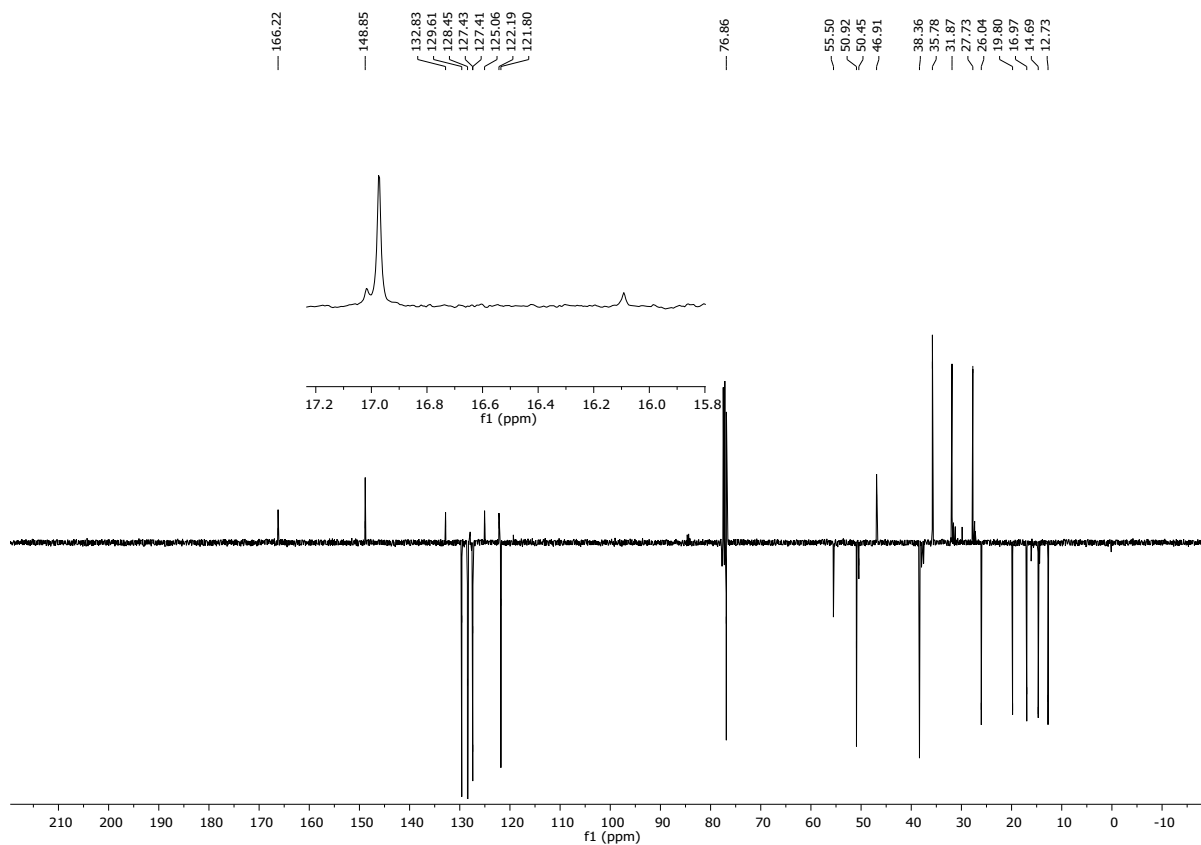

$^{19}\text{F}\{^1\text{H}\}$ -NMR ( $\text{CDCl}_3$ , 376.56 MHz)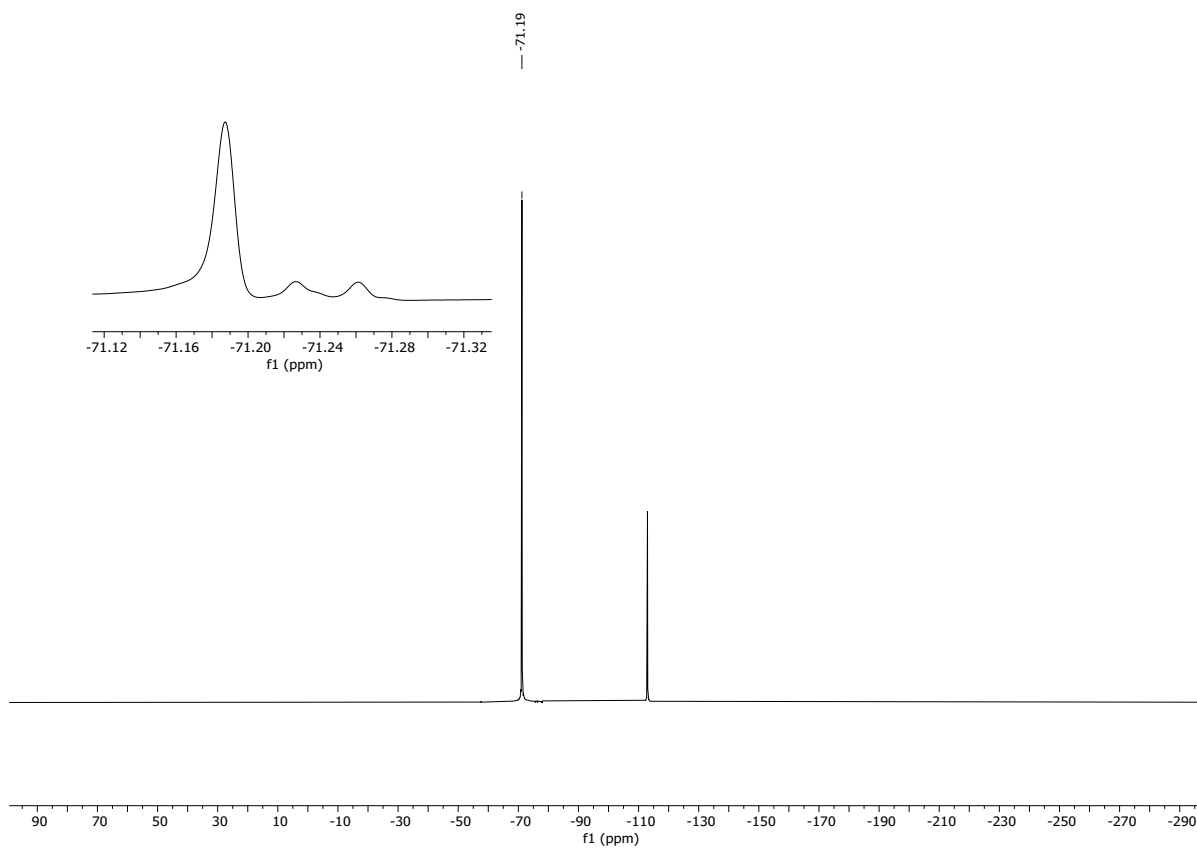HSQC- $(^1\text{H}-^{13}\text{C})$ -NMR ( $\text{CDCl}_3$ , 400 MHz)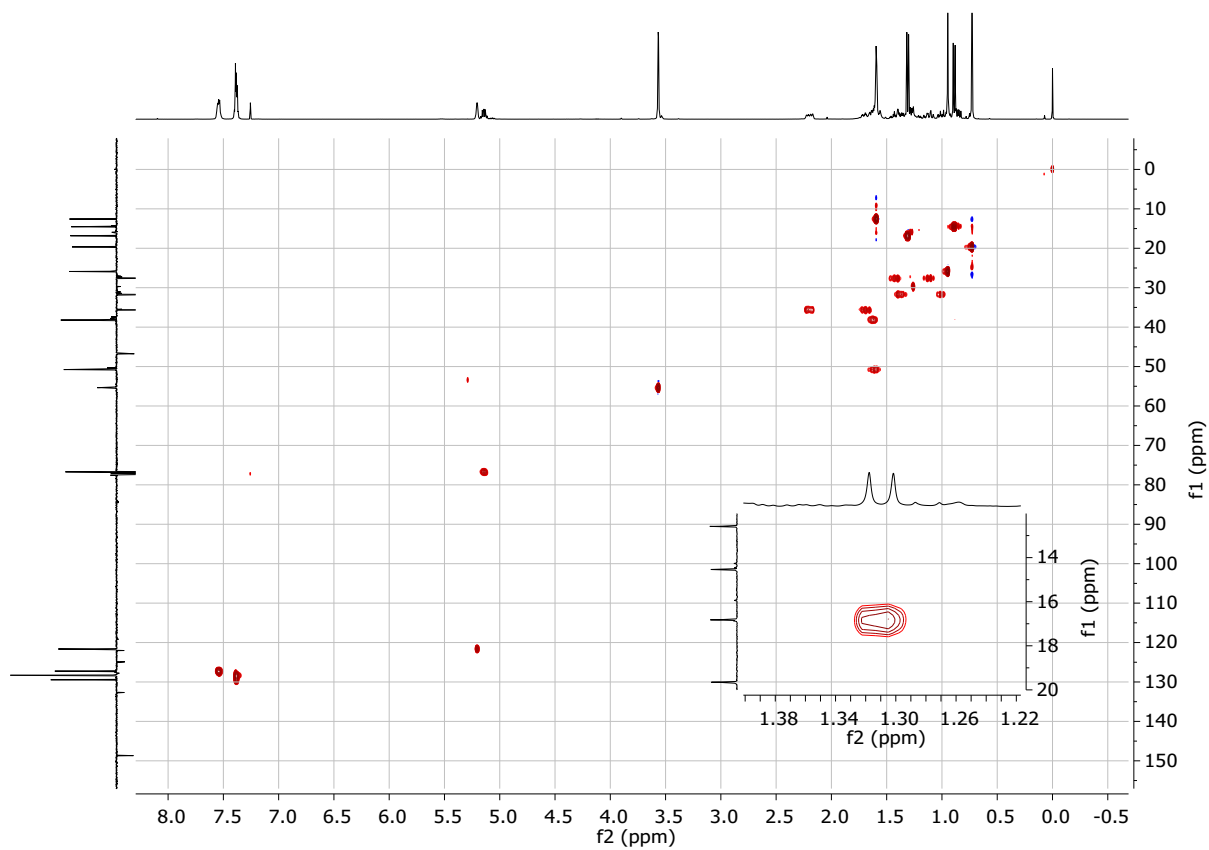

**(R)-MTPA-Evo270** $^1\text{H-NMR}$  ( $\text{CDCl}_3$ , 400 MHz)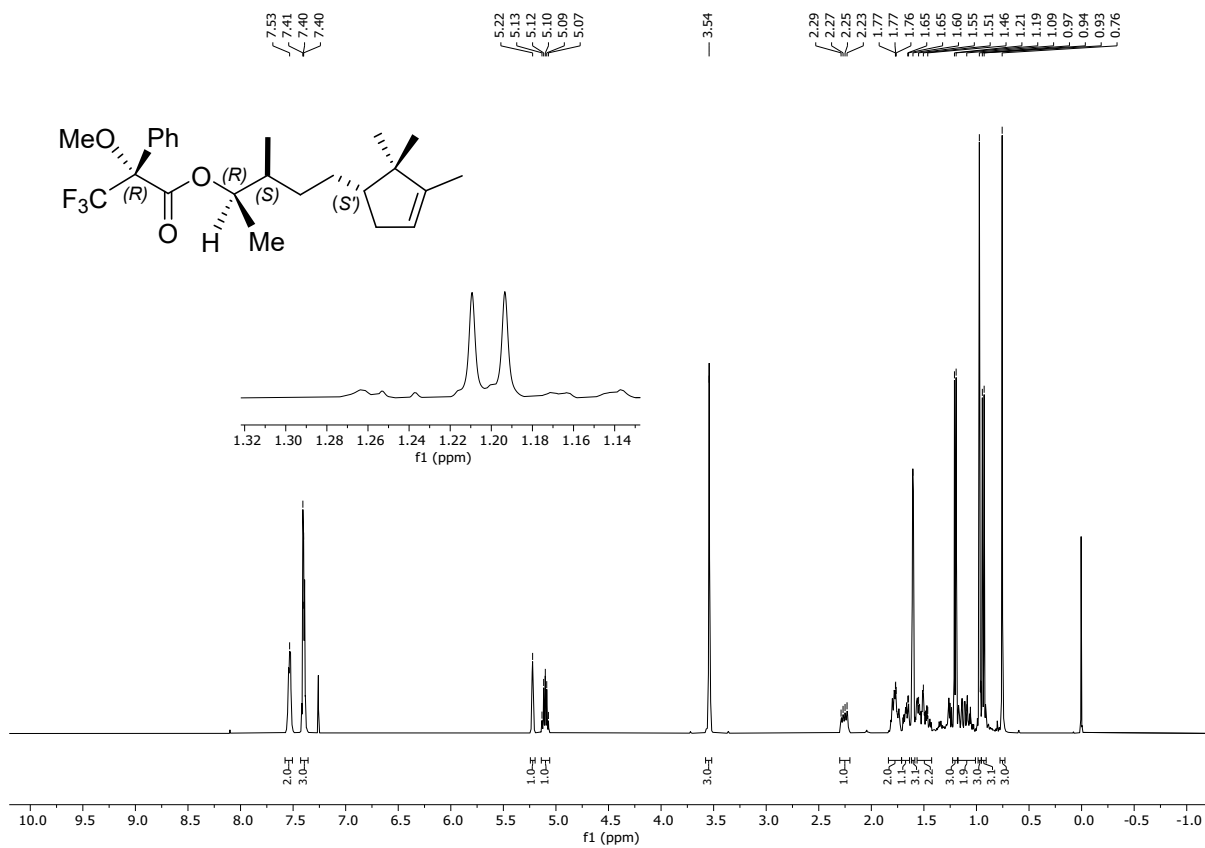 $^{13}\text{C}\{^1\text{H}\}$ -NMR ( $\text{CDCl}_3$ , 101 MHz)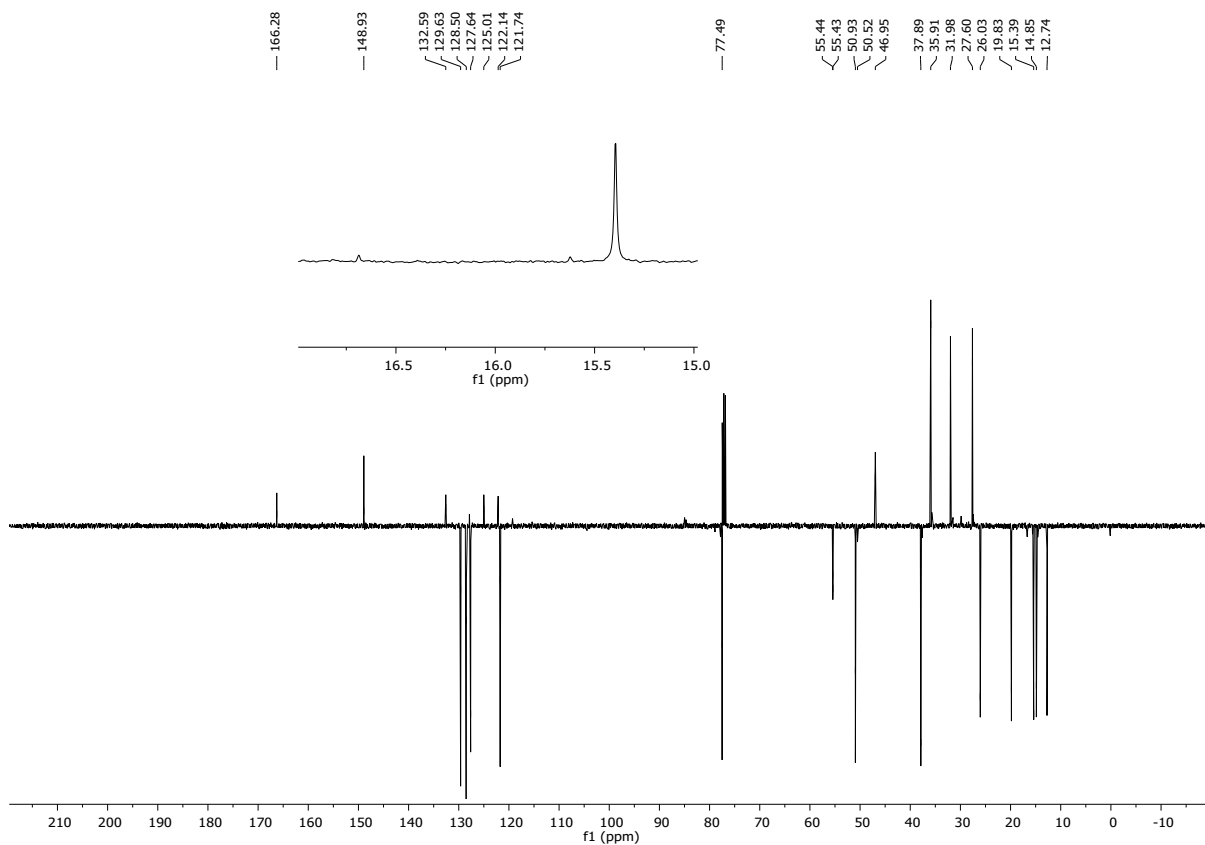

$^{19}\text{F}\{^1\text{H}\}$ -NMR ( $\text{CDCl}_3$ , 376.56 MHz)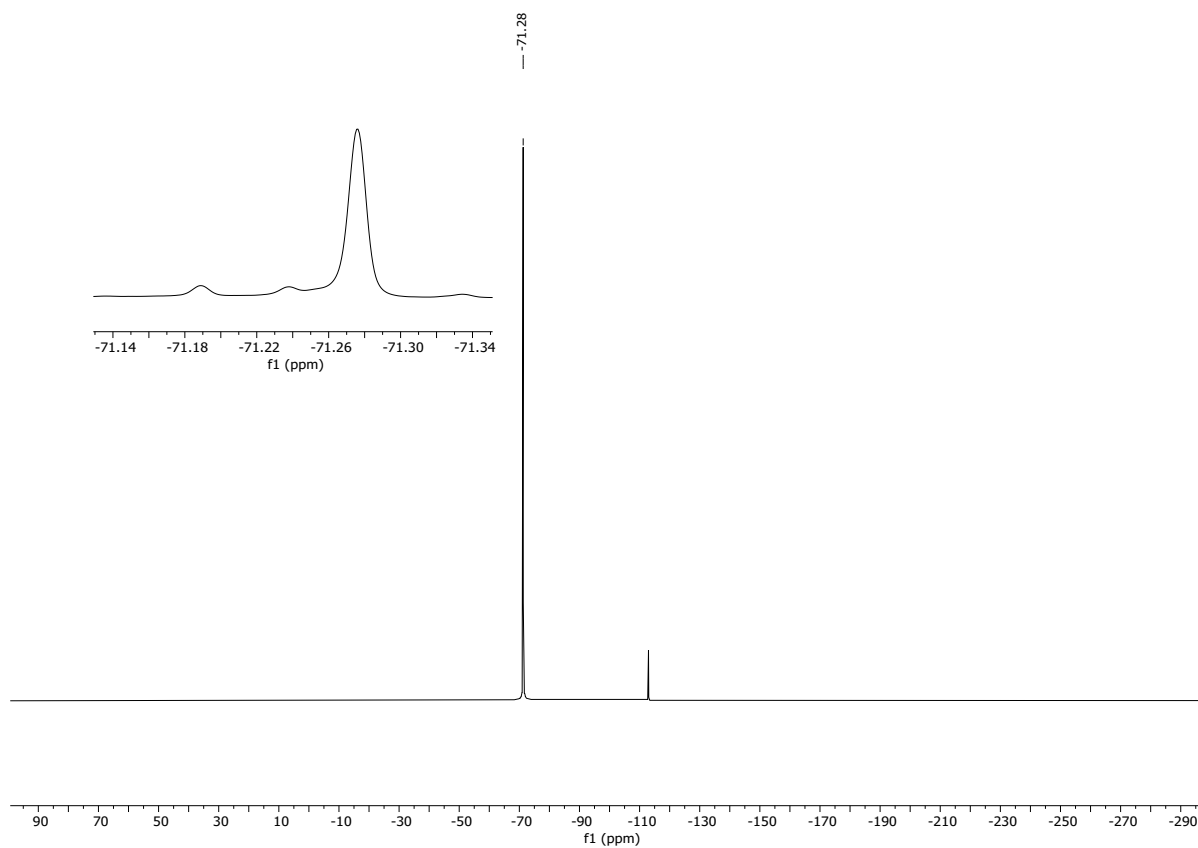HSQC- $(^1\text{H}-^{13}\text{C})$ -NMR ( $\text{CDCl}_3$ , 400 MHz)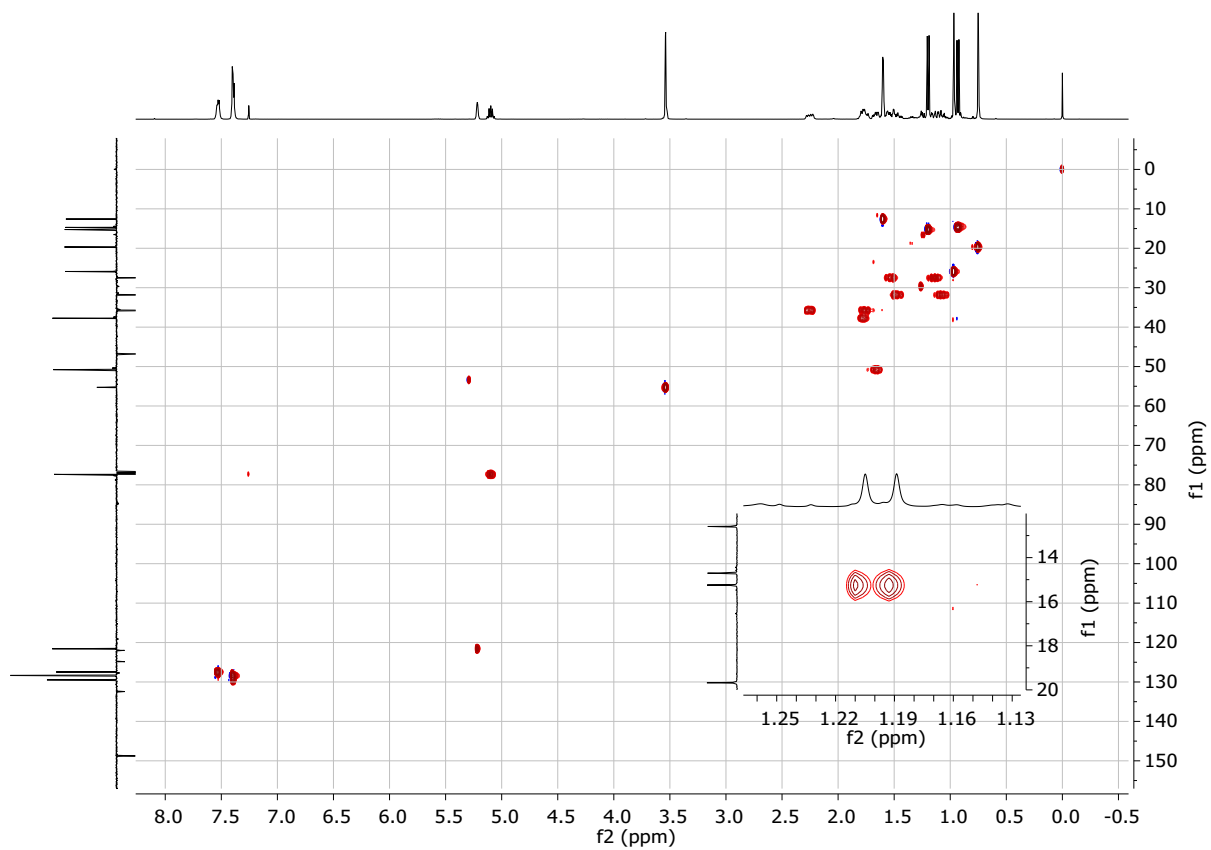



$^{19}\text{F}\{^1\text{H}\}$ -NMR ( $\text{CDCl}_3$ , 376.56 MHz)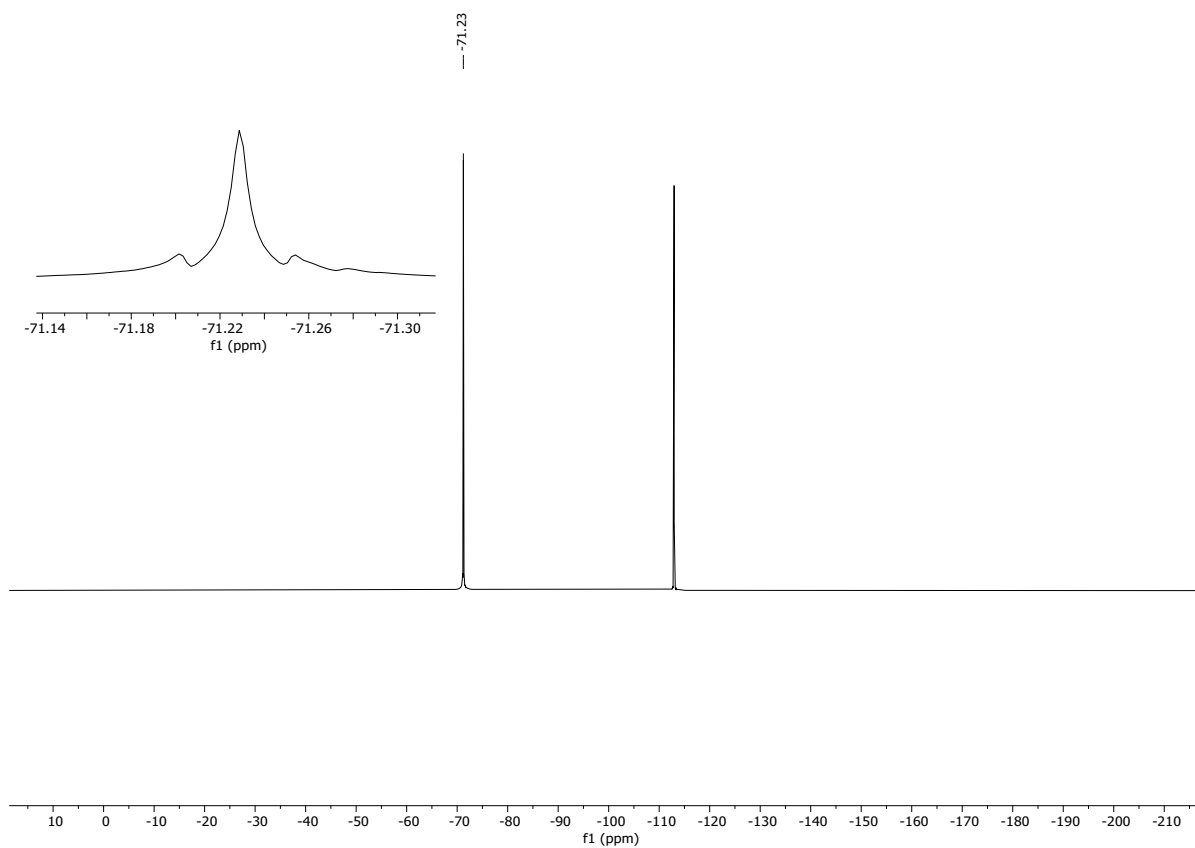HSQC- $(^1\text{H}-^{13}\text{C})$ -NMR ( $\text{CDCl}_3$ , 400 MHz)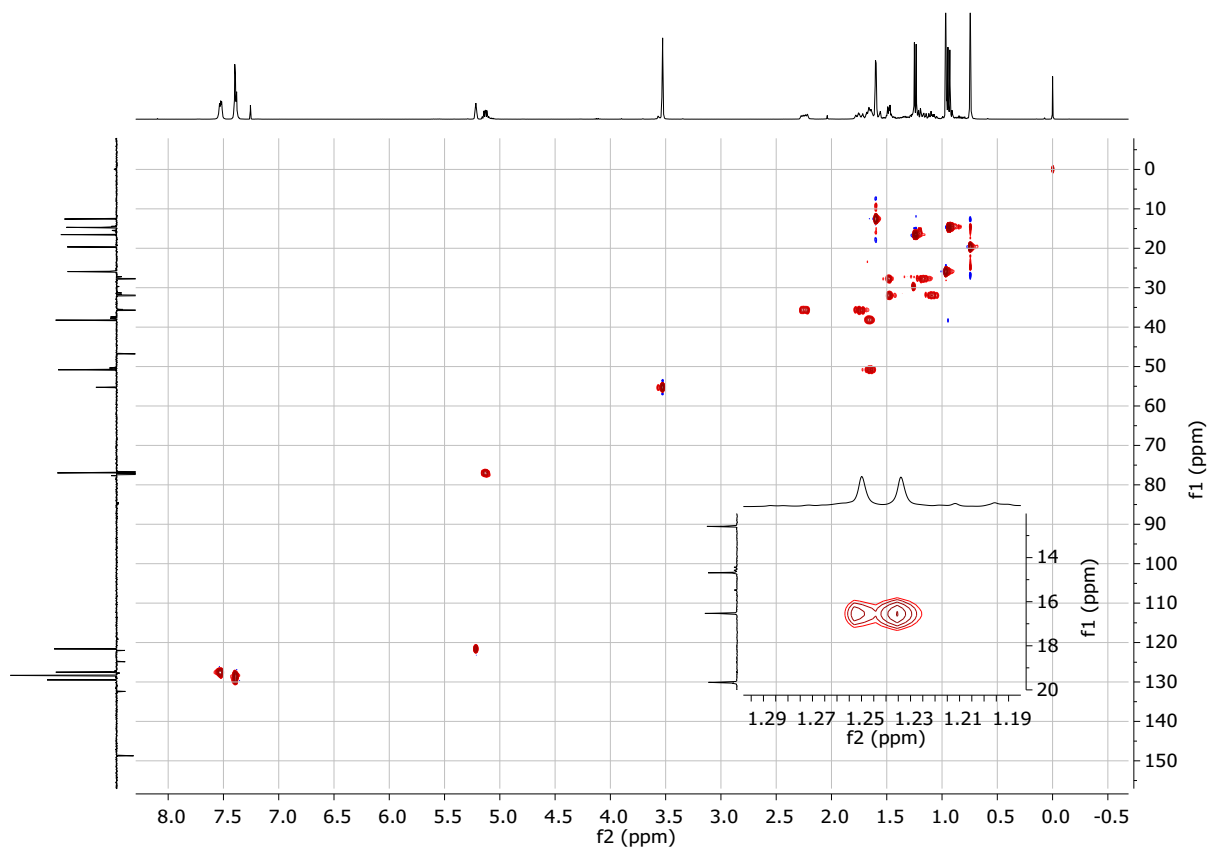



**(S)-MTPA-Evo270** $^1\text{H-NMR}$  ( $\text{CDCl}_3$ , 400 MHz)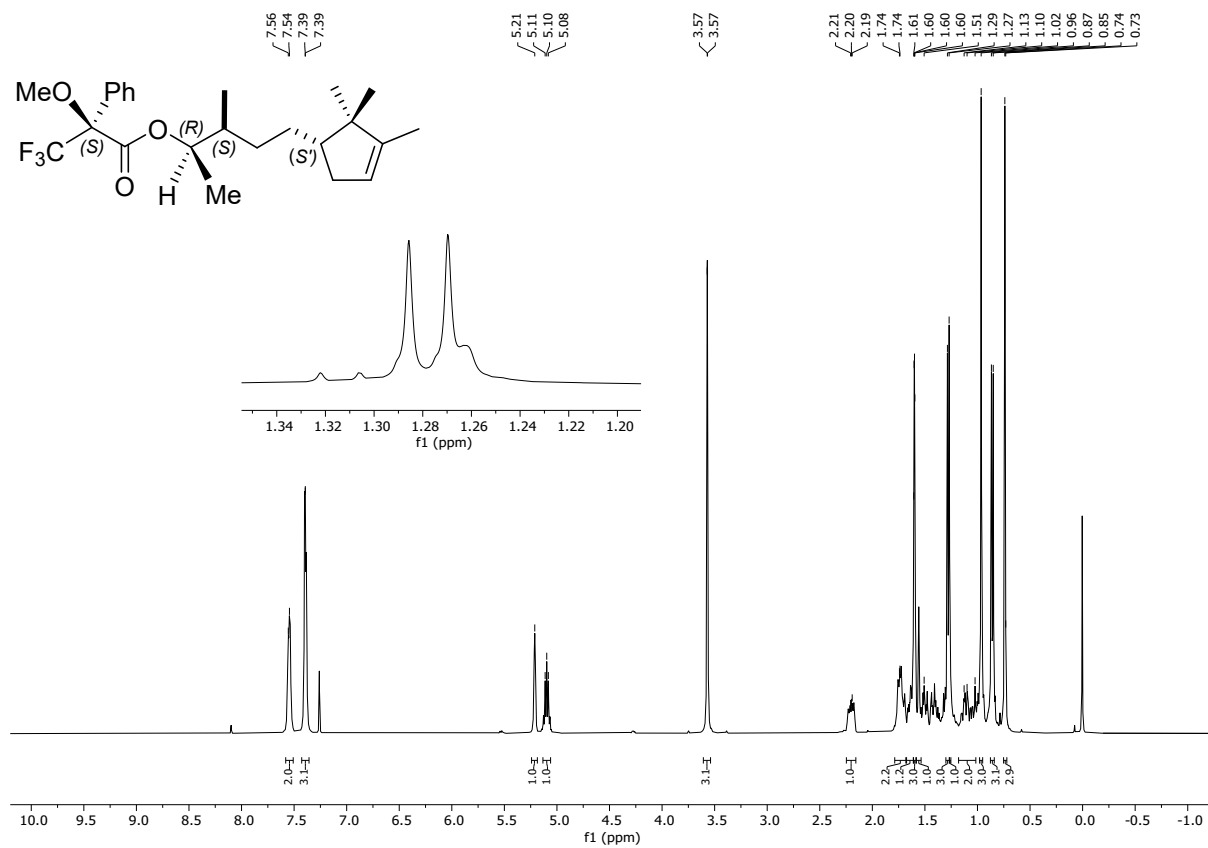 $^{13}\text{C}\{^1\text{H}\}$ -NMR ( $\text{CDCl}_3$ , 101 MHz)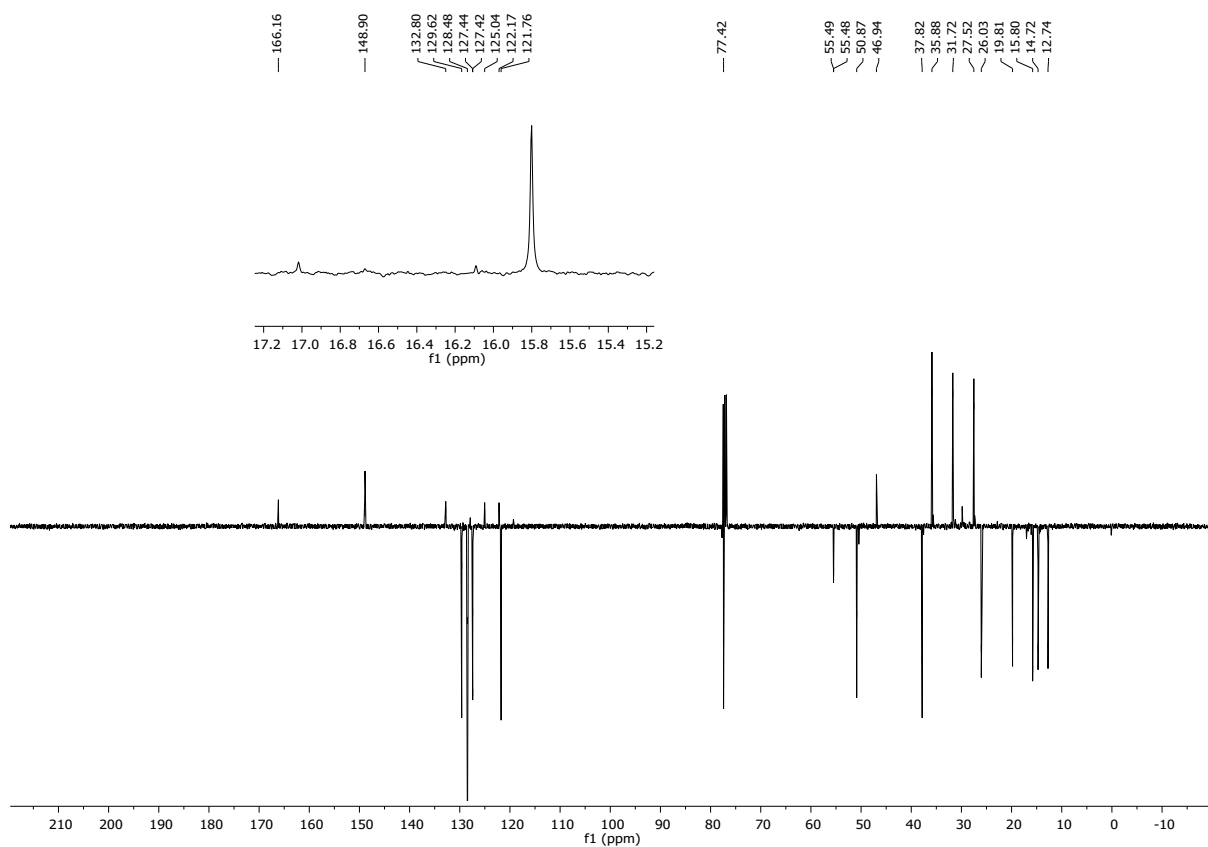

$^{19}\text{F}\{^1\text{H}\}$ -NMR ( $\text{CDCl}_3$ , 376.56 MHz)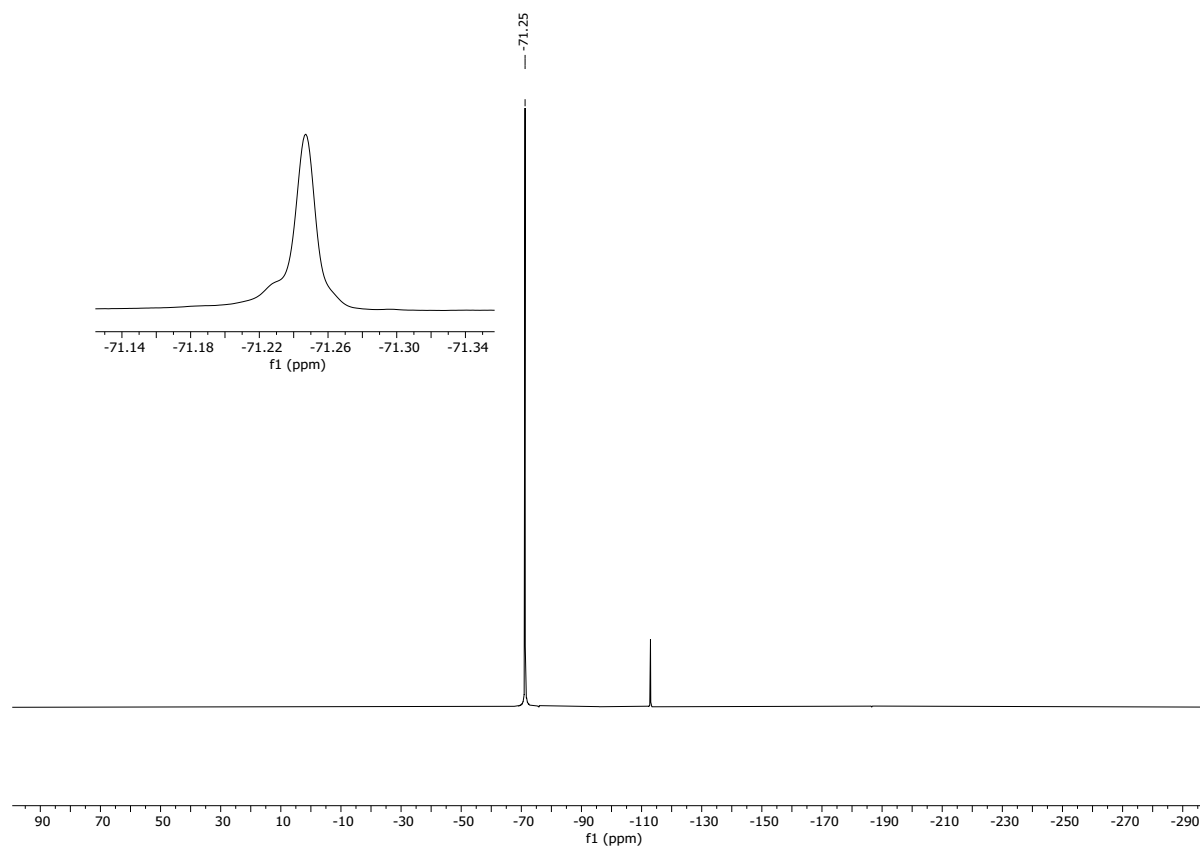HSQC- $(^1\text{H}-^{13}\text{C})$ -NMR ( $\text{CDCl}_3$ , 400 MHz)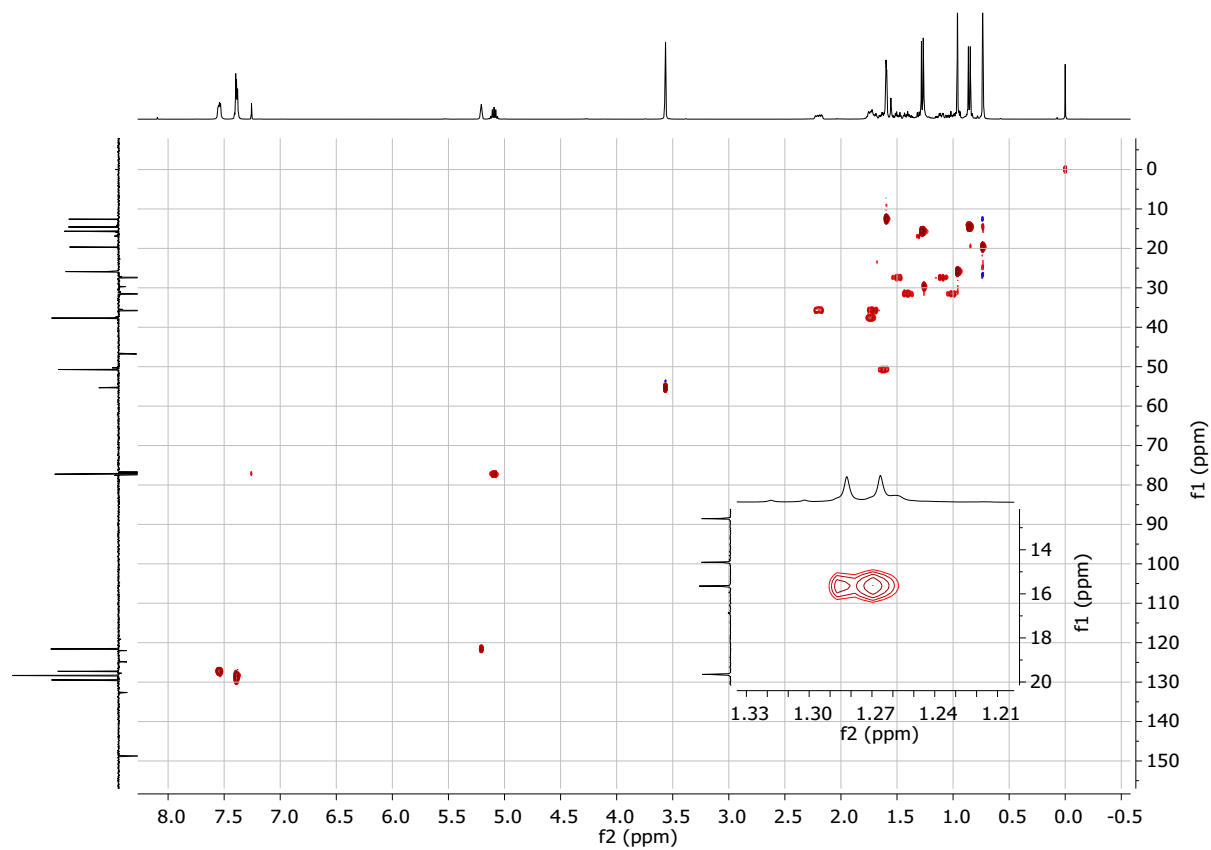

**(R,E)-2-methyl-4-(2,2,3-trimethylcyclopent-3-en-1-yl)but-2-en-1-ol**<sup>1</sup>H-NMR (CDCl<sub>3</sub>, 400 MHz)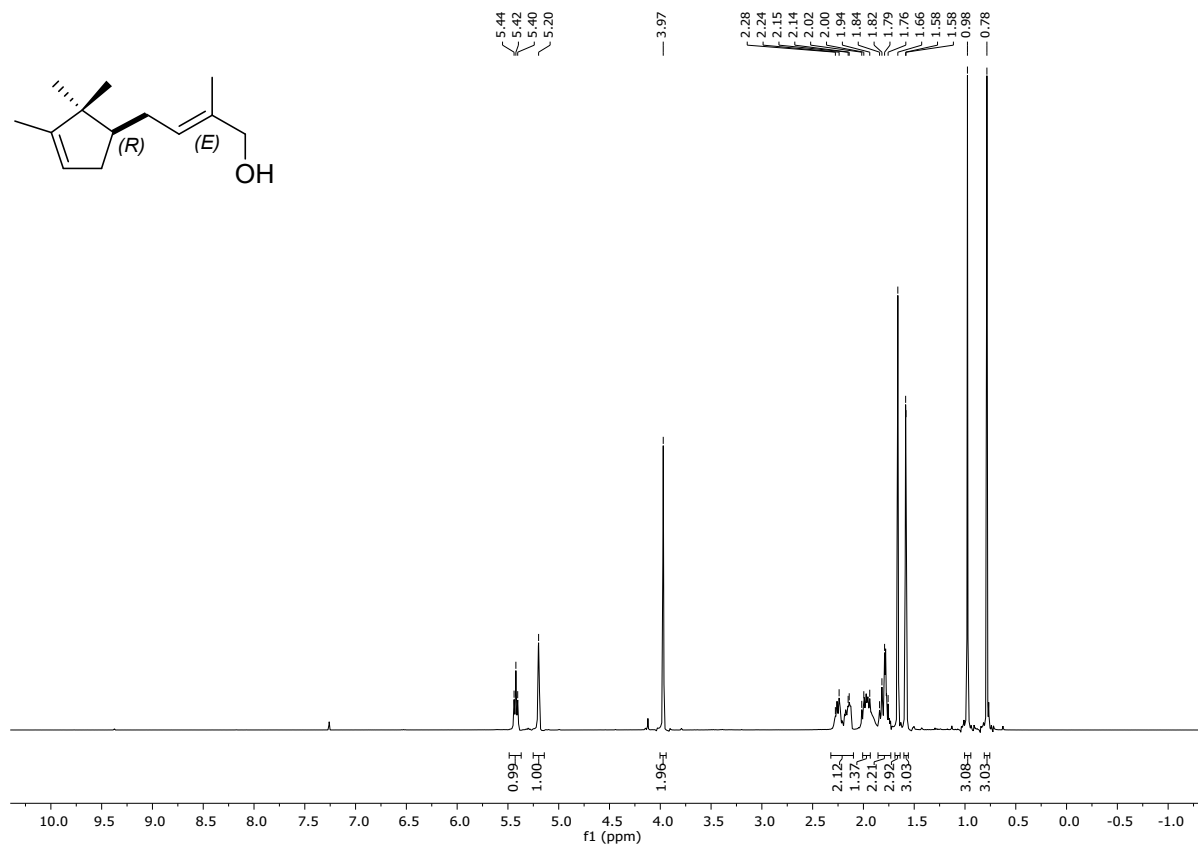<sup>13</sup>C{<sup>1</sup>H}-NMR (CDCl<sub>3</sub>, 101 MHz)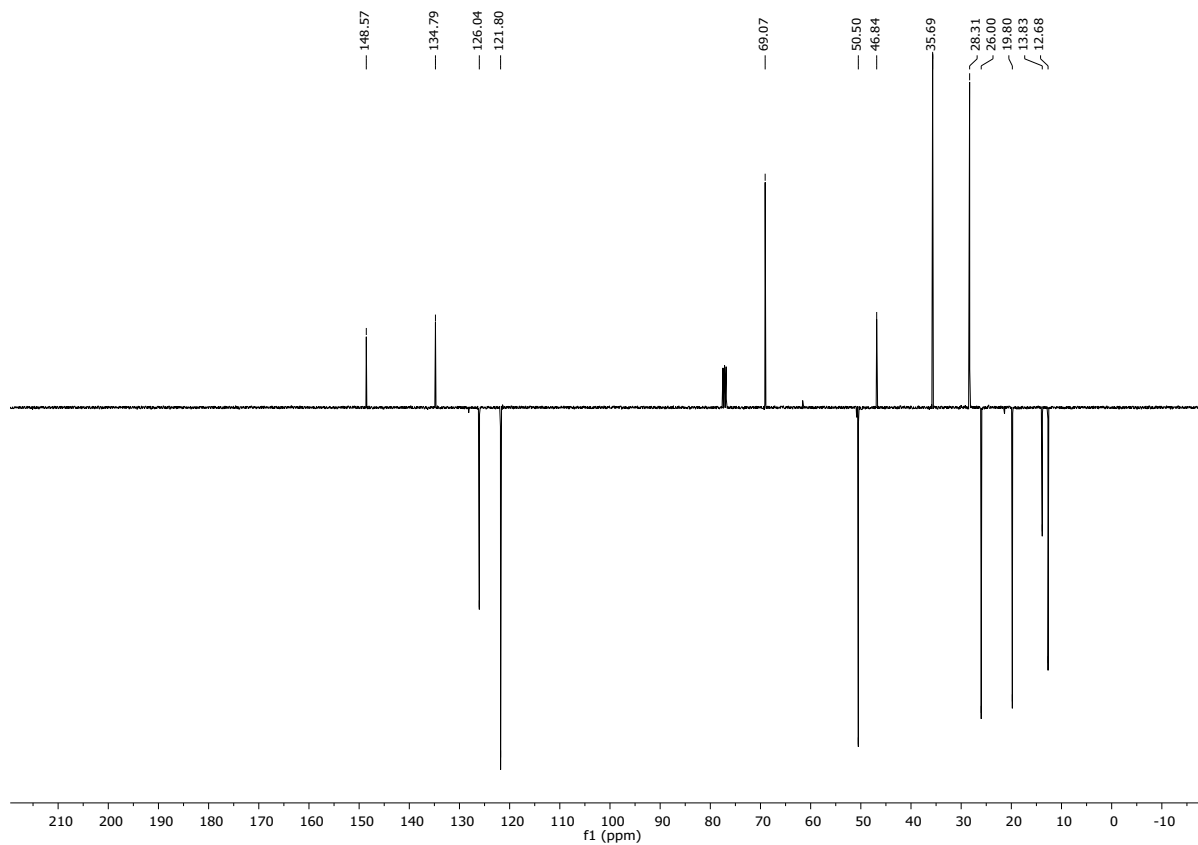

## References and Notes

1. M. Bechtold, E. Brenna, C. Femmer, F.G. Gatti, S. Panke, F. Parmeggiani and A. Sacchetti, *Org. Process. Res. Dev.*, 2012, **16**, 269-276.
2. N. Beyer, J. K. Kulig, A. Bartsch, M. A. Hayes, D. B. Janssen and M.W. Fraaije, *Appl. Microbiol. Biotechnol.*, 2017, **101**, 2319-2331.
3. R. Spaccini, L. Liguori, C. Punta, H.-R. Bjørsvik, *ChemSusChem*, 2012, **5**, 261-265.
4. J. K. Crandall and L. C. Crawley, *Org. Synth.*, 1973, **53**, 17.
5. G. B. Payne, P. H. Deming and P. H. Williams, *J. Org. Chem.*, 1961, **26**, 659-663.
6. C. Chapuis and R. Brauchli, *Helv. Chim. Acta*, 1992, **75**, 1527-1546.
7. P. H. Boyle, W. Cocker, D. H. Grayson and P. V. R. Shannon, *J. Chem. Soc. C*, 1971, 2136-2142.
8. D. B. Reisner and E. C. Horning, *Org. Synth.*, 1950, **30**, 22.
9. <sup>13</sup>C-NMR with inversion gate sequence, relaxation delay= 20 s, by adding Cr(acac)<sub>3</sub> as relaxing agent.
10. L. Lopez, G. Mele, V. Fiandanese, C. Cardellicchio and A. Nacci, *Tetrahedron*, 1994, **50**, 9097-9106.
11. Z.-B. Xu and J. Qu, *Chem. - Eur. J.*, 2013, **19**, 314-323.
12. J. B. Lewis and G. W. Hedrick, *J. Org. Chem.*, 1965, **30**, 4271-4275.
13. J. A. Bajgrowicz, I. Frank, G. Fráter and M. Hennig, *Helv. Chim. Acta*, 1998, **81**, 1349-1358.
14. G. G. Kolomeyer, J. Oylo and D. A. Ferone, US-7263329 B1, 2007.
15. K. Derdziński, C. Wawrzeńczyk and A. Zabza, *J. Prakt. Chem. (Leipzig)*, 1984, **326**, 196-212.
16. A. Erkkilä and P. M. Pihko, *J. Org. Chem.*, 2006, **71**, 2538-2541.
17. (a) C. Chapuis and P.A. Blanc, US-5696075, 1997 (to Firmenich SA). (b) C. Chapuis, C. Carole, P. Fankhauser, R. Challand and J. J. Riedhauser, *Helv. Chim. Acta*, 2009, **92**, 1782-1799.
18. L. F. Tietze, H. Geissler, J. Fennen, S. Brand and G. Schulz, *J. Org. Chem.*, 1994, **59**, 182-191.
19. G. E. Gream, D. Wege and M. Mular, *Aust. J. Chem.*, 1974, **27**, 567-587.
20. A. A. Munkuev, N. S. Dyrkheeva, T. E. Kornienko, E. S. Ilina, D. I. Ivankin, E. V. Suslov, D. V. Korchagina, Y. V. Gatilov, A. L. Zakharenko, A. A. Malakhova, J. Reynisson, K. P. Volcho, N. F. Salakhutdinov and O. I. Lavrik, *Molecules*, 2022, **27**, 3374.
21. O. Tsutsumi, M. Tamaru, H. Nakasato, S. Shimai, S. Panthai, Y. Kuroda, K. Yamaguchi, K. Fujisawa and K. Hisano, *Molecules*, 2019, **24**, 4606.
22. B. C. Ranu and A. Sarkar, *Tetrahedron Lett.*, 1994, **35**, 8649-8650.
23. A. Y. Hong, N. B. Bennett, M. R. Krout, T. Jensen, A. M. Harned and B. M. Stoltz, *Tetrahedron*, 2011, **67**, 10234-10248.
24. J. M. Khurana and P. Sharma, *Bull. Chem. Soc. Jpn.*, 2004, **77**, 549-552.
25. T. B. Aayed and H. Amri, *Synth. Commun.*, 1995, **25**, 3813-3819.
26. R. Manikandan, R. S. Phatake and N. G. Lemcoff, *Chem. - Eur. J.*, 2022, **28**, e202200634.
27. K. Hirota, Y. Monguchi, H. Sajiki, M. Sako and Y. Kitade, *J. Chem. Soc.*, 1998, **5**, 941-946.
28. M. J. Thrippleton and J. Keeler, *Angew. Chem. Int. Ed.*, 2003, **42**, 3938-3941.
29. Gaussian 16, Revision C.01, M. J. Frisch, G. W. Trucks, H. B. Schlegel, G. E. Scuseria, M. A. Robb, J. R. Cheeseman, G. Scalmani, V. Barone, G. A. Petersson, H. Nakatsuji, X. Li, M. Caricato, A. V. Marenich, J. Bloino, B. G. Janesko, R. Gomperts, B. Mennucci, H. P. Hratchian, J. V. Ortiz, A. F. Izmaylov, J. L. Sonnenberg, D. Williams-Young, F. Ding, F. Lipparini, F. Egidi, J. Goings, B. Peng, A. Petrone, T. Henderson, D. Ranasinghe, V. G. Zakrzewski, J. Gao, N. Rega, G. Zheng, W. Liang, M. Hada, M. Ehara, K. Toyota, R. Fukuda, J. Hasegawa, M. Ishida, T. Nakajima, Y. Honda, O. Kitao, H. Nakai, T. Vreven, K. Throssell, J. A., Jr. Montgomery, J. E. Peralta, F. Ogliaro, M. J. Bearpark, J. J. Heyd, E. N. Brothers, K. N. Kudin, V. N. Staroverov, T. A. Keith, R. Kobayashi, J. Normand, K. Raghavachari, A. P. Rendell, J. C. Burant, S. S. Iyengar, J. Tomasi, M. Cossi, J. M. Millam, M. Klene, C. Adamo, R. Cammi, J. W. Ochterski, R. L. Martin, K. Morokuma, O. Farkas, J. B. Foresman and D. J. Fox, Gaussian, Inc., Wallingford CT, 2016.
30. (a) A. D. Becke, *J. Chem. Phys.*, 1993, **98**, 5648-5652. (b) C. Lee, W. Yang and R. G. Parr, *Phys. Rev. Condens. Matter Mater. Phys.*, 1988, **37**, 785-789.
31. S. Grimme, J. Antony, S. Ehrlich and H. Krieg, *J. Chem. Phys.*, 2010, **132**, 154104.
32. M. Head-Gordon, J. A. People and M. Frisch, *J. Chem. Phys. Lett.*, 1988, **153**, 503-506.
33. A. V. Marenich, C. J. Cramer and D. G. Truhlar, *J. Phys. Chem. B*, 2009, **113**, 6378-6396.
34. CYLview, 1.0b; Legault, C. Y., Université de Sherbrooke, 2009 (<http://www.cylview.org>).
35. Steroid Urine Type Odorants & Sandalwood Type Odorants: ([http://www.leffingwell.com/chirality/steroid\\_%26\\_sandalwood.htm](http://www.leffingwell.com/chirality/steroid_%26_sandalwood.htm)).
36. A. Takaschi, M. Hiroyuki and Y. Takeshi, JP-8268940, 1996 (to Takasago Perfumery Co LTD).
37. K. Van Aken, L. Streckowski and L. Patiny, *Beilstein J. Org. Chem.*, 2006, **2**, DOI: 10.1186/1860-5397-2-3.
38. I. Kosaku, T. Shigeyoshi and A. Takahiro, WO2007063703A1, 2007 (to Kao Corporation).
